# Supplementary material for: Asp-containing actinomycin and tetracyclic chromophoric analogues from the Streptomyces sp. strain S22
Source: Royal Society of Chemistry journal article supplement (doi:10.1039/d2ob02247h), 2023-01-01

## Supporting Information

### **Asp-containing Actinomycin and Tetracyclic Chromophoric Analogues from *Streptomyces* sp. Strain S22.**

Wanzhu Zhao<sup>a†</sup>, Guangfei Wang<sup>b†</sup>, Lin Guo<sup>a</sup>, Jingmin Wang<sup>a</sup>, Congcong Jing<sup>a</sup>, Ben Liu<sup>a</sup>, Feng Zhao<sup>a</sup>, Shumin Zhang<sup>a,\*</sup> and Zeping Xie<sup>a,\*</sup>

<sup>a</sup>School of Pharmacy, Binzhou Medical University, Yantai 264003, China

<sup>b</sup>College of Life Sciences, Yantai University, Yantai 264003, China

\*Corresponding author: zepingxie@sina.com (Z. X.); shumín\_zhang@outlook.com (S. Z.)

# Contents

|                                                                                                                                                                                                                                                                                                        |     |
|--------------------------------------------------------------------------------------------------------------------------------------------------------------------------------------------------------------------------------------------------------------------------------------------------------|-----|
| Table S1. NMR data for compound <b>1</b> in CDCl <sub>3</sub> <sup>a</sup> .....                                                                                                                                                                                                                       | S5  |
| Table S2. NMR data for compound <b>2</b> in CDCl <sub>3</sub> <sup>a</sup> .....                                                                                                                                                                                                                       | S8  |
| Table S3. NMR data for compound <b>3</b> in CDCl <sub>3</sub> .....                                                                                                                                                                                                                                    | S11 |
| Table S4. NMR data for compound <b>4</b> in CDCl <sub>3</sub> <sup>a</sup> .....                                                                                                                                                                                                                       | S14 |
| Fig. S1 Neighbour-joining tree based on 16S rRNA gene sequences of strain S22 and related strains in the family Streptomycece. Numbers at nodes refer to percentage bootstrap values (based on 1000 replicates; only values. 50 % are shown). Bar, 5 substitutions per 1000 nucleotide positions. .... | S15 |
| Fig. S2 Chiral amino acid analysis of <b>1</b> . .....                                                                                                                                                                                                                                                 | S16 |
| Fig. S3 UV spectrum of compound <b>1</b> .....                                                                                                                                                                                                                                                         | S17 |
| Fig. S4 UV spectrum of compound <b>2</b> .....                                                                                                                                                                                                                                                         | S18 |
| Fig. S5 UV spectrum of compound <b>3</b> .....                                                                                                                                                                                                                                                         | S19 |
| Fig. S6 CD spectrum of compound <b>1</b> .....                                                                                                                                                                                                                                                         | S20 |
| Fig. S7 CD spectrum of compound <b>2</b> .....                                                                                                                                                                                                                                                         | S21 |
| Fig. S8 CD spectrum of compound <b>3</b> .....                                                                                                                                                                                                                                                         | S22 |
| Fig. S9 The dose-response curve of antibacterial activities for actinomycins <b>1–3</b> . ....                                                                                                                                                                                                         | S23 |
| Fig. S10 <sup>1</sup> H NMR spectrum (600 MHz) of compound <b>1</b> in CDCl <sub>3</sub> .....                                                                                                                                                                                                         | S28 |

|                                                                                                             |     |
|-------------------------------------------------------------------------------------------------------------|-----|
| Fig. S11 $^{13}\text{C}\{^1\text{H}\}$ NMR spectrum (150 MHz) of compound <b>1</b> in $\text{CDCl}_3$ ..... | S29 |
| Fig. S12 DEPT-135 spectrum (150 MHz) of compound <b>1</b> in $\text{CDCl}_3$ .....                          | S30 |
| Fig. S13 COSY spectrum (600 MHz) of compound <b>1</b> in $\text{CDCl}_3$ . ....                             | S31 |
| Fig. S14 HSQC spectrum (600 MHz) of compound <b>1</b> in $\text{CDCl}_3$ . ....                             | S32 |
| Fig. S15 HMBC spectrum (600 MHz) of compound <b>1</b> in $\text{CDCl}_3$ . ....                             | S33 |
| Fig. S16 NOESY spectrum (600 MHz) of compound <b>1</b> in $\text{CDCl}_3$ .....                             | S34 |
| Fig. S17 HRESIMS spectrum of compound <b>1</b> . ....                                                       | S35 |
| Fig. S18 $^1\text{H}$ NMR spectrum (600 MHz) of compound <b>2</b> in $\text{CDCl}_3$ .....                  | S36 |
| Fig. S19 $^{13}\text{C}\{^1\text{H}\}$ NMR spectrum (150 MHz) of compound <b>2</b> in $\text{CDCl}_3$ ..... | S37 |
| Fig. S20 DEPT-135 spectrum (150 MHz) of compound <b>2</b> in $\text{CDCl}_3$ .....                          | S38 |
| Fig. S21 COSY spectrum (600 MHz) of compound <b>2</b> in $\text{CDCl}_3$ . ....                             | S39 |
| Fig. S22 HSQC spectrum (600 MHz) of compound <b>2</b> in $\text{CDCl}_3$ . ....                             | S40 |
| Fig. S23 HMBC spectrum (600 MHz) of compound <b>2</b> in $\text{CDCl}_3$ . ....                             | S41 |
| Fig. S24 NOESY spectrum (600 MHz) of compound <b>2</b> in $\text{CDCl}_3$ .....                             | S42 |
| Fig. S25 HRESIMS spectrum of compound <b>2</b> . ....                                                       | S43 |
| Fig. S26 $^1\text{H}$ NMR spectrum (600 MHz) of compound <b>3</b> in $\text{CDCl}_3$ .....                  | S44 |
| Fig. S27 $^{13}\text{C}\{^1\text{H}\}$ NMR spectrum (150 MHz) of compound <b>3</b> in $\text{CDCl}_3$ ..... | S45 |
| Fig. S28 DEPT-135 spectrum (150 MHz) of compound <b>3</b> in $\text{CDCl}_3$ .....                          | S46 |

|                                                                                                                    |     |
|--------------------------------------------------------------------------------------------------------------------|-----|
| Fig. S29 COSY spectrum (600 MHz) of compound <b>3</b> in CDCl <sub>3</sub> . .....                                 | S47 |
| Fig. S30 HSQC spectrum (600 MHz) of compound <b>3</b> in CDCl <sub>3</sub> . .....                                 | S48 |
| Fig. S31 HMBC spectrum (600 MHz) of compound <b>3</b> in CDCl <sub>3</sub> . .....                                 | S49 |
| Fig. S32 NOESY spectrum (600 MHz) of compound <b>3</b> in CDCl <sub>3</sub> . .....                                | S50 |
| Fig. S33 HRESIMS spectrum of compound <b>3</b> . .....                                                             | S51 |
| Fig. S34 <sup>1</sup> H NMR spectrum (600 MHz) of compound <b>4</b> in CDCl <sub>3</sub> . .....                   | S52 |
| Fig. S35 <sup>13</sup> C{ <sup>1</sup> H} NMR spectrum (150 MHz) of compound <b>4</b> in CDCl <sub>3</sub> . ..... | S53 |
| Fig. S36 DEPT-135 spectrum (150 MHz) of compound <b>4</b> in CDCl <sub>3</sub> . .....                             | S54 |
| Fig. S37 COSY spectrum (600 MHz) of compound <b>4</b> in CDCl <sub>3</sub> . .....                                 | S55 |
| Fig. S38 HSQC spectrum (600 MHz) of compound <b>4</b> in CDCl <sub>3</sub> . .....                                 | S56 |
| Fig. S39 HMBC spectrum (600 MHz) of compound <b>4</b> in CDCl <sub>3</sub> . .....                                 | S57 |
| Fig. S40 ESIMS spectrum of compound <b>4</b> . .....                                                               | S58 |

**Table S1. NMR data for compound 1 in CDCl<sub>3</sub><sup>a</sup>**

| $\alpha$ -ring | no. | $\delta_C$ , type     | $\delta_H$ mult ( <i>J</i> , Hz)             | COSY                                                                   | HMBC                                                                                                              | NOESY                                     |
|----------------|-----|-----------------------|----------------------------------------------|------------------------------------------------------------------------|-------------------------------------------------------------------------------------------------------------------|-------------------------------------------|
| Thr            | 1   | 169.4, C              |                                              |                                                                        |                                                                                                                   |                                           |
|                | 2   | 56.0, CH              | 5.10, dd (6.6, 2.3)                          | NH <sub>Thr</sub> , H-3 <sub>Thr</sub>                                 | C-1 <sub>Thr</sub> , C-13                                                                                         | NH <sub>D-Val</sub>                       |
|                | 3   | 75.0, CH              | 5.31, qd (6.4, 2.3)                          | H-2 <sub>Thr</sub> , H-4 <sub>Thr</sub>                                | C-1 <sub>MeVal</sub> , C-4 <sub>Thr</sub>                                                                         | NH <sub>D-Val</sub>                       |
|                | 4   | 17.7, CH <sub>3</sub> | 1.35, d (6.4)                                | H-3 <sub>Thr</sub>                                                     | C-2 <sub>Thr</sub> , C-3 <sub>Thr</sub>                                                                           |                                           |
|                | NH  |                       | 7.03, d (6.6)                                | H-2 <sub>Thr</sub>                                                     | C-1 <sub>Thr</sub> , C-13                                                                                         |                                           |
| MeVal          | 1   | 167.7, C              |                                              |                                                                        |                                                                                                                   |                                           |
|                | 2   | 71.5, CH              | 2.68, d (8.6)                                | H-3 <sub>MeVal</sub>                                                   | C-1 <sub>MeVal</sub> , C-1 <sub>Sar</sub> , C-3 <sub>MeVal</sub> , C-4 <sub>MeVal</sub> ,<br>NMe <sub>MeVal</sub> | NMe <sub>MeVal</sub>                      |
|                | 3   | 26.8, CH              | 2.68, m                                      | H-2 <sub>MeVal</sub> , H-4 <sub>MeVal</sub> , H-<br>5 <sub>MeVal</sub> | C-1 <sub>MeVal</sub> , C-4 <sub>MeVal</sub> , NMe <sub>MeVal</sub>                                                |                                           |
|                | 4   | 21.7, CH <sub>3</sub> | 0.96, d (6.1)                                | H-3 <sub>MeVal</sub>                                                   | C-2 <sub>MeVal</sub> , C-3 <sub>MeVal</sub>                                                                       |                                           |
|                | 5   | 20.5, CH <sub>3</sub> | 0.73, d (6.4)                                | H-3 <sub>MeVal</sub>                                                   | C-1 <sub>MeVal</sub> , C-2 <sub>MeVal</sub> , C-3 <sub>MeVal</sub> , C-<br>4 <sub>MeVal</sub>                     |                                           |
| Sar            | NMe | 39.5, CH <sub>3</sub> | 2.94, s                                      |                                                                        | C-1 <sub>Sar</sub> , C-2 <sub>MeVal</sub>                                                                         | H-2 <sub>MeVal</sub> , H-2 <sub>Sar</sub> |
|                | 1   | 166.4, C              |                                              |                                                                        |                                                                                                                   |                                           |
| Pro            | 2   | 51.5, CH <sub>2</sub> | 4.67, d (17.2);<br>3.63, d (17.2)            |                                                                        | C-1 <sub>Sar</sub> , C-1 <sub>Pro</sub> , NMe <sub>Sar</sub>                                                      | NMe <sub>MeVal</sub> , H-2 <sub>Pro</sub> |
|                | NMe | 34.8, CH <sub>3</sub> | 2.86, s                                      |                                                                        | C-1 <sub>Pro</sub> , C-2 <sub>Sar</sub>                                                                           |                                           |
| Pro            | 1   | 173.3, C              |                                              |                                                                        |                                                                                                                   |                                           |
|                | 2   | 56.0, CH              | 6.25, d (8.2)                                | H-3 <sub>Pro</sub>                                                     | C-1 <sub>Pro</sub> , C-1 <sub>D-Val</sub> , C-3 <sub>Pro</sub> , C-4 <sub>Pro</sub> , C-<br>5 <sub>Pro</sub>      | H-2 <sub>Sar</sub> , H-2 <sub>D-Val</sub> |
|                | 3   | 30.7, CH <sub>2</sub> | 2.25, m;<br>1.74, dd (10.1, 5.2)             | H-2 <sub>Pro</sub> , H-4 <sub>Pro</sub>                                | C-1 <sub>Pro</sub> , C-2 <sub>Pro</sub> , C-4 <sub>Pro</sub>                                                      |                                           |
|                | 4   | 23.0, CH <sub>2</sub> | 2.25, m; 1.98, m                             | H-3 <sub>Pro</sub> , H-5 <sub>Pro</sub>                                | C-1 <sub>Pro</sub> , C-3 <sub>Pro</sub> , C-5 <sub>Pro</sub>                                                      |                                           |
|                | 5   | 47.1, CH <sub>2</sub> | 4.15, td (10.3, 7.0)<br>3.66, td (10.3, 1.6) | H-4 <sub>Pro</sub>                                                     | C-1 <sub>D-Val</sub> , C-2 <sub>Pro</sub> , C-3 <sub>Pro</sub> , C-4 <sub>Pro</sub>                               | H-2 <sub>D-Val</sub>                      |

|                |     |                       |                                   |                                                                       |                                                                                            |                                                                |
|----------------|-----|-----------------------|-----------------------------------|-----------------------------------------------------------------------|--------------------------------------------------------------------------------------------|----------------------------------------------------------------|
| D-Val          | 1   | 170.0, C              |                                   |                                                                       |                                                                                            |                                                                |
|                | 2   | 59.0, CH              | 3.55, dd (10.3, 6.3)              | NH <sub>D-Val</sub> , H-3 <sub>D-Val</sub>                            | C-1 <sub>D-Val</sub> , C-1 <sub>Thr</sub> , C-3 <sub>D-Val</sub> , C-5 <sub>D-Val</sub>    | H-2 <sub>Pro</sub> , H-5 <sub>Pro</sub>                        |
|                | 3   | 31.7, CH              | 2.08, m                           | H-2 <sub>D-Val</sub> , H-4 <sub>D-Val</sub> , H-5 <sub>D-Val</sub>    | C-2 <sub>D-Val</sub> , C-4 <sub>D-Val</sub>                                                |                                                                |
|                | 4   | 19.1, CH <sub>3</sub> | 0.85, d (6.7)                     | H-3 <sub>D-Val</sub>                                                  | C-2 <sub>D-Val</sub> , C-3 <sub>D-Val</sub> , C-5 <sub>D-Val</sub>                         |                                                                |
|                | 5   | 18.6, CH <sub>3</sub> | 1.08, d (6.7)                     | H-3 <sub>D-Val</sub>                                                  | C-2 <sub>D-Val</sub> , C-3 <sub>D-Val</sub> , C-4 <sub>D-Val</sub>                         |                                                                |
|                | NH  |                       | 8.52, d (6.3)                     | H-2 <sub>D-Val</sub>                                                  | C-1 <sub>Thr</sub> , C-2 <sub>D-Val</sub> , C-3 <sub>D-Val</sub>                           | H-2 <sub>Thr</sub> , H-3 <sub>Thr</sub>                        |
| <i>β</i> -ring | no. | $\delta_C$ , type     | $\delta_H$ mult ( <i>J</i> , Hz)  | COSY                                                                  | HMBC                                                                                       | NOESY                                                          |
| Thr            | 1   | 170.6, C              |                                   |                                                                       |                                                                                            |                                                                |
|                | 2   | 55.3, CH              | 4.95, dd (7.7, 1.5)               | NH <sub>Thr</sub> , H-3 <sub>Thr</sub>                                | C-1 <sub>Thr</sub> , 14                                                                    | NH <sub>D-Val</sub>                                            |
|                | 3   | 72.5, CH              | 5.40, qd (6.6, 1.5)               | H-2 <sub>Thr</sub> , H-4 <sub>Thr</sub>                               | C-1 <sub>Thr</sub> , C-1 <sub>Me-Val</sub> , C-2 <sub>Thr</sub> , C-4 <sub>Thr</sub>       | NH <sub>D-Val</sub>                                            |
|                | 4   | 18.5, CH <sub>3</sub> | 1.11, d (6.6)                     | H-3 <sub>Thr</sub>                                                    | C-2 <sub>Thr</sub> , C-3 <sub>Thr</sub>                                                    |                                                                |
|                | NH  |                       | 8.62, d (7.7)                     | H-2 <sub>Thr</sub>                                                    | C-1 <sub>Thr</sub> , C-2 <sub>Thr</sub> , C-14                                             | NMe <sub>MeVal</sub>                                           |
| MeVal          | 1   | 165.8, C              |                                   |                                                                       |                                                                                            |                                                                |
|                | 2   | 72.9, CH              | 2.58, d (11.0)                    | H-3 <sub>Me-Val</sub>                                                 | C-1 <sub>Me-Val</sub> , C-1 <sub>Sar</sub> , C-3 <sub>Me-Val</sub> , NMe <sub>Me-Val</sub> | NMe <sub>Me-Val</sub>                                          |
|                | 3   | 22.6, CH              | 2.96, m                           | H-2 <sub>Me-Val</sub> , H-4 <sub>Me-Val</sub> , H-5 <sub>Me-Val</sub> | C-1 <sub>Me-Val</sub> , C-2 <sub>Me-Val</sub> , C-4 <sub>Me-Val</sub>                      |                                                                |
|                | 4   | 18.4, CH <sub>3</sub> | 0.71, d (6.7)                     | H-3 <sub>Me-Val</sub>                                                 | C-2 <sub>Me-Val</sub> , C-3 <sub>Me-Val</sub>                                              |                                                                |
|                | 5   | 19.5, CH <sub>3</sub> | 0.75, d (6.5)                     | H-3 <sub>Me-Val</sub>                                                 | C-2 <sub>Me-Val</sub> , C-3 <sub>Me-Val</sub> , C-4 <sub>Me-Val</sub>                      |                                                                |
|                | NMe | 39.5, CH <sub>3</sub> | 2.73, s                           |                                                                       | C-1 <sub>Sar</sub> , C-2 <sub>Me-Val</sub>                                                 | NH <sub>Thr</sub> , H-2 <sub>Me-Val</sub> , H-2 <sub>Sar</sub> |
| Sar            | 1   | 174.4, C              |                                   |                                                                       |                                                                                            |                                                                |
|                | 2   | 53.3, CH <sub>2</sub> | 5.28, d (17.6);<br>3.87, d (17.6) |                                                                       | C-1 <sub>Sar</sub> , NMe <sub>Sar</sub>                                                    | NMe <sub>Me-Val</sub>                                          |
|                | NMe | 35.3, CH <sub>3</sub> | 2.85, s                           |                                                                       | C-1 <sub>Asp</sub> , C-2 <sub>Sar</sub>                                                    |                                                                |
| Asp            | 1   | 170.7, C              |                                   |                                                                       |                                                                                            |                                                                |
|                | 2   | 50.5, CH              | 5.23, dt (9.2, 3.0)               | NH <sub>Asp</sub> , H-3 <sub>Asp</sub>                                | C-1 <sub>Asp</sub> , C-1 <sub>D-Val</sub> , C-3 <sub>Asp</sub> , C-4 <sub>Asp</sub>        |                                                                |

|             |     |                       |                                  |                                                                        |                                                                                           |                      |
|-------------|-----|-----------------------|----------------------------------|------------------------------------------------------------------------|-------------------------------------------------------------------------------------------|----------------------|
| D-Val       | 3   | 34.6, CH <sub>2</sub> | 3.27, dd (15.7, 3.2);<br>2.97, m | H-2 <sub>Asp</sub>                                                     | C-1 <sub>Asp</sub> , C-1 <sub>D-Val</sub> , C-2 <sub>Asp</sub> , C-4 <sub>Asp</sub>       |                      |
|             | 4   | 172.7, C              |                                  |                                                                        |                                                                                           |                      |
|             | NH  |                       | 7.48, d (3.0)                    | H-2 <sub>Asp</sub>                                                     | C-1 <sub>D-Val</sub> , C-2 <sub>Asp</sub>                                                 | H-2 <sub>D-Val</sub> |
|             | 1   | 174.4, C              |                                  |                                                                        |                                                                                           |                      |
|             | 2   | 63.1, CH              | 2.99, dd (9.2, 2.5)              | NH <sub>D-Val</sub> , H-3 <sub>D-Val</sub>                             | C-3 <sub>D-Val</sub> , C-4 <sub>D-Val</sub>                                               | NH <sub>Asp</sub>    |
|             | 3   | 30.0, CH              | 1.96, m                          | H-2 <sub>D-Val</sub> , H-4 <sub>D-Val</sub> , H-<br>5 <sub>D-Val</sub> | C-1 <sub>D-Val</sub> , C-2 <sub>D-Val</sub> , C-4 <sub>D-Val</sub> , C-5 <sub>D-Val</sub> |                      |
|             | 4   | 19.9, CH <sub>3</sub> | 1.20, d (6.6)                    | H-3 <sub>D-Val</sub>                                                   | C-2 <sub>D-Val</sub> , C-3 <sub>D-Val</sub> , C-5 <sub>D-Val</sub>                        |                      |
|             | 5   | 19.1, CH <sub>3</sub> | 0.98, d (6.7)                    | H-3 <sub>D-Val</sub>                                                   | C-2 <sub>D-Val</sub> , C-3 <sub>D-Val</sub> , C-4 <sub>D-Val</sub>                        |                      |
| NH          |     | 7.52, d (2.5)         | H-2 <sub>D-Val</sub>             | C-1 <sub>Thr</sub> , C-2 <sub>D-Val</sub> , C-3 <sub>D-Val</sub>       | H-2 <sub>Thr</sub> , H-3 <sub>Thr</sub>                                                   |                      |
| chromophore | no. | $\delta_C$ , type     | $\delta_H$ mult ( <i>J</i> , Hz) | COSY                                                                   | HMBC                                                                                      | NOESY                |
|             | 1   | 98.3, C               |                                  |                                                                        |                                                                                           |                      |
|             | 2   | 150.3, C              |                                  |                                                                        |                                                                                           |                      |
|             | 3   | 179.1, C              |                                  |                                                                        |                                                                                           |                      |
|             | 4   | 113.9, C              |                                  |                                                                        |                                                                                           |                      |
|             | 4a  | 146.0, C              |                                  |                                                                        |                                                                                           |                      |
|             | 5a  | 140.3, C              |                                  |                                                                        |                                                                                           |                      |
|             | 6   | 127.6, C              |                                  |                                                                        |                                                                                           |                      |
|             | 7   | 130.4, CH             | 7.37, d (7.7)                    | H-8                                                                    | C-5a, C-9, C-11                                                                           | H-11                 |
|             | 8   | 125.8, CH             | 7.69, d (7.7)                    | H-7                                                                    | C-5a, C-6, C-9a, C-13                                                                     |                      |
|             | 9   | 132.1, C              |                                  |                                                                        |                                                                                           |                      |
|             | 9a  | 128.5, C              |                                  |                                                                        |                                                                                           |                      |
|             | 10a | 146.5, C              |                                  |                                                                        |                                                                                           |                      |
|             | 11  | 15.0, CH <sub>3</sub> | 2.53, s                          |                                                                        | C-5a, C-6, C-7                                                                            | H-7                  |
|             | 12  | 7.9, CH <sub>3</sub>  | 2.25, s                          |                                                                        | C-3, C-4, C-4a                                                                            |                      |
|             | 13  | 166.4, C              |                                  |                                                                        |                                                                                           |                      |
|             | 14  | 167.5, C              |                                  |                                                                        |                                                                                           |                      |

NH<sub>2</sub> 9.93, d (8.0);  
6.96, d (8.0) C-1, C-3

<sup>a</sup>600 MHz for <sup>1</sup>H NMR and 150 MHz for <sup>13</sup>C NMR. <sup>b</sup>Numbers of attached protons were determined by analysis of 2D spectra.

**Table S2. NMR data for compound 2 in CDCl<sub>3</sub><sup>a</sup>**

| $\alpha$ -ring | no. | $\delta_C$ , type     | $\delta_H$ mult (J, Hz)           | COSY                                                               | HMBC                                                                                                             | NOESY                |
|----------------|-----|-----------------------|-----------------------------------|--------------------------------------------------------------------|------------------------------------------------------------------------------------------------------------------|----------------------|
| Thr            | 1   | 168.8, C              |                                   |                                                                    |                                                                                                                  |                      |
|                | 2   | 55.1, CH              | 5.12, d (9.3)                     | NH <sub>Thr</sub>                                                  | C-1 <sub>Thr</sub>                                                                                               | H-4 <sub>Thr</sub>   |
|                | 3   | 70.5, CH              | 5.75, d (5.3)                     | H-4 <sub>Thr</sub>                                                 |                                                                                                                  |                      |
|                | 4   | 17.3, CH <sub>3</sub> | 1.13, d (6.4)                     | H-3 <sub>Thr</sub>                                                 | C-2 <sub>Thr</sub> , C-3 <sub>Thr</sub>                                                                          |                      |
|                | NH  |                       | 8.83, d (8.4)                     | H-2 <sub>Thr</sub>                                                 | C-13                                                                                                             | H-8                  |
| MeVal          | 1   | 169.0, C              |                                   |                                                                    |                                                                                                                  |                      |
|                | 2   | 60.4, CH              | 4.70, d (12.1)                    | H-3 <sub>MeVal</sub>                                               | C-1 <sub>MeVal</sub> , C-3 <sub>MeVal</sub> , C-4 <sub>MeVal</sub> , C-5 <sub>MeVal</sub> , NMe <sub>MeVal</sub> | H-4 <sub>MeVal</sub> |
|                | 3   | 27.8, CH              | 2.12, m                           | H-2 <sub>MeVal</sub> , H-4 <sub>MeVal</sub> , H-5 <sub>MeVal</sub> | C-2 <sub>MeVal</sub>                                                                                             |                      |
|                | 4   | 19.3, CH <sub>3</sub> | 0.80, d (6.7)                     | H-3 <sub>MeVal</sub>                                               | C-2 <sub>MeVal</sub> , C-3 <sub>MeVal</sub>                                                                      | H-2 <sub>MeVal</sub> |
|                | 5   | 18.2, CH <sub>3</sub> | 0.73, d (6.6)                     | H-3 <sub>MeVal</sub>                                               | C-2 <sub>MeVal</sub> , C-3 <sub>MeVal</sub>                                                                      |                      |
|                | NMe | 30.6, CH <sub>3</sub> | 3.16, s                           |                                                                    | C-1 <sub>Sar</sub> , C-2 <sub>MeVal</sub>                                                                        |                      |
| Sar            | 1   | 170.6, C              |                                   |                                                                    |                                                                                                                  |                      |
|                | 2   | 49.6, CH <sub>2</sub> | 4.72, d (14.7);<br>3.01, d (14.7) |                                                                    | C-1 <sub>Sar</sub> , C-1 <sub>Pro</sub> , NMe <sub>Sar</sub>                                                     |                      |
|                | NMe | 38.8, CH <sub>3</sub> | 3.37, s                           |                                                                    | C-1 <sub>Pro</sub> , C-2 <sub>Sar</sub>                                                                          |                      |
| Pro            | 1   | 172.9, C              |                                   |                                                                    |                                                                                                                  |                      |
|                | 2   | 55.7, CH              | 4.82, d (6.9)                     | H-3 <sub>Pro</sub>                                                 | C-3 <sub>Pro</sub> , C-4 <sub>Pro</sub> , C-5 <sub>Pro</sub>                                                     |                      |
|                | 3   | 28.6, CH <sub>2</sub> | 1.99, m; 1.87, m                  | H-2 <sub>Pro</sub> , H-4 <sub>Pro</sub>                            | C-1 <sub>Pro</sub> , C-2 <sub>Pro</sub> , C-4 <sub>Pro</sub> , C-5 <sub>Pro</sub>                                |                      |
|                | 4   | 24.8, CH <sub>2</sub> | 2.31, m; 1.99, m                  | H-3 <sub>Pro</sub> , H-5 <sub>Pro</sub>                            | C-1 <sub>Pro</sub> , C-2 <sub>Pro</sub> , C-5 <sub>Pro</sub>                                                     |                      |
|                | 5   | 47.1, CH <sub>2</sub> | 4.05, m<br>3.47, td (7.1, 8.9)    | H-4 <sub>Pro</sub>                                                 | C-2 <sub>Pro</sub> , C-3 <sub>Pro</sub> , C-4 <sub>Pro</sub>                                                     |                      |



|                |     |                       |                                   |                                                                       |                                                                                         |                                                |
|----------------|-----|-----------------------|-----------------------------------|-----------------------------------------------------------------------|-----------------------------------------------------------------------------------------|------------------------------------------------|
| D-Val          | 1   | 171.4, C              |                                   |                                                                       |                                                                                         |                                                |
|                | 2   | 56.2, CH              | 4.30, t (7.5)                     | NH <sub>D-Val</sub> , H-3 <sub>D-Val</sub>                            | C-1 <sub>D-Val</sub> , C-1 <sub>Thr</sub> , C-3 <sub>D-Val</sub> , C-5 <sub>D-Val</sub> | H-5 <sub>D-Val</sub>                           |
|                | 3   | 29.8, CH              | 1.86, m                           | H-2 <sub>D-Val</sub> , H-4 <sub>D-Val</sub> , H-5 <sub>D-Val</sub>    |                                                                                         |                                                |
|                | 4   | 19.4, CH <sub>3</sub> | 0.86, d (6.8)                     | H-3 <sub>D-Val</sub>                                                  | C-2 <sub>D-Val</sub> , C-3 <sub>D-Val</sub>                                             |                                                |
|                | 5   | 18.3, CH <sub>3</sub> | 0.82, d (6.6)                     | H-3 <sub>D-Val</sub>                                                  | C-2 <sub>D-Val</sub> , C-3 <sub>D-Val</sub>                                             | H-2 <sub>D-Val</sub> , NH <sub>D-Val</sub>     |
|                | NH  |                       | 6.37, d (7.1)                     | H-2 <sub>D-Val</sub>                                                  | C-1 <sub>Thr</sub>                                                                      | H-5 <sub>D-Val</sub>                           |
| <i>β</i> -ring | no. | $\delta_C$ , type     | $\delta_H$ mult ( <i>J</i> , Hz)  | COSY                                                                  | HMBC                                                                                    | NOESY                                          |
| Thr            | 1   | 169.5, C              |                                   |                                                                       |                                                                                         |                                                |
|                | 2   | 56.1, CH              | 4.90, d (6.7)                     | NH <sub>Thr</sub>                                                     | C-3 <sub>Thr</sub> , C-4 <sub>Thr</sub> , 14                                            | H-4 <sub>Thr</sub>                             |
|                | 3   | 70.2, CH              | 5.64, q (6.2)                     | H-4 <sub>Thr</sub>                                                    | C-1 <sub>Me-Val</sub> , C-4 <sub>Thr</sub>                                              |                                                |
|                | 4   | 17.4, CH <sub>3</sub> | 1.22, d (6.4)                     | H-3 <sub>Thr</sub>                                                    | C-2 <sub>Thr</sub> , C-3 <sub>Thr</sub>                                                 | H-2 <sub>Thr</sub>                             |
|                |     | NH                    |                                   | 9.89, d (8.4)                                                         | H-2 <sub>Thr</sub>                                                                      | C-2 <sub>Thr</sub> , C-3 <sub>Thr</sub> , C-14 |
| MeVal          | 1   | 169.4, C              |                                   |                                                                       |                                                                                         |                                                |
|                | 2   | 60.9, CH              | 4.91, d (11.0)                    | H-3 <sub>Me-Val</sub>                                                 | C-1 <sub>Me-Val</sub> , C-3 <sub>Me-Val</sub> , NMe <sub>Me-Val</sub>                   |                                                |
|                | 3   | 27.7, CH              | 2.17, m                           | H-2 <sub>Me-Val</sub> , H-4 <sub>Me-Val</sub> , H-5 <sub>Me-Val</sub> | C-1 <sub>Me-Val</sub> , C-2 <sub>Me-Val</sub>                                           |                                                |
|                | 4   | 19.4, CH <sub>3</sub> | 0.88, d (6.5)                     | H-3 <sub>Me-Val</sub>                                                 | C-2 <sub>Me-Val</sub> , C-3 <sub>Me-Val</sub> , C-5 <sub>Me-Val</sub>                   |                                                |
|                | 5   | 18.2, CH <sub>3</sub> | 0.77, d (6.7)                     | H-3 <sub>Me-Val</sub>                                                 | C-2 <sub>Me-Val</sub> , C-3 <sub>Me-Val</sub> , C-4 <sub>Me-Val</sub>                   |                                                |
|                | NMe | 30.6, CH <sub>3</sub> | 3.04, s                           |                                                                       | C-1 <sub>Sar</sub> , C-2 <sub>Me-Val</sub>                                              | H-2 <sub>Sar</sub>                             |
| Sar            | 1   | 169.0, C              |                                   |                                                                       |                                                                                         |                                                |
|                | 2   | 49.2, CH <sub>2</sub> | 4.98, d (14.2);<br>3.05, d (14.2) |                                                                       | C-1 <sub>OPro</sub> , C-1 <sub>Sar</sub> , NMe <sub>Sar</sub>                           | NMe <sub>Me-Val</sub>                          |
|                | NMe | 37.5, CH <sub>3</sub> | 3.34, s                           |                                                                       | C-1 <sub>OPro</sub> , C-2 <sub>Sar</sub>                                                |                                                |
| OPro           | 1   | 171.4, C              |                                   |                                                                       |                                                                                         |                                                |
|                | 2   | 51.5, CH              | 5.37, dd (7.1, 1.9)               | H-3 <sub>OPro</sub>                                                   | C-3 <sub>OPro</sub> , C-4 <sub>OPro</sub>                                               |                                                |
|                | 3   | 40.6, CH <sub>2</sub> | 2.51, d (7.7);<br>2.50, d (2.7)   | H-2 <sub>OPro</sub>                                                   | C-1 <sub>OPro</sub> , C-2 <sub>OPro</sub> , C-4 <sub>OPro</sub>                         |                                                |
|                | 4   | 207.1, C              |                                   |                                                                       |                                                                                         |                                                |

|             |       |                       |                                   |                                                                    |                                                                                         |                      |
|-------------|-------|-----------------------|-----------------------------------|--------------------------------------------------------------------|-----------------------------------------------------------------------------------------|----------------------|
|             | 5     | 52.8, CH <sub>2</sub> | 4.37, d (17.2);<br>3.89, d (17.2) |                                                                    | C-2 <sub>OPro</sub> , C-3 <sub>OPro</sub> , C-4 <sub>OPro</sub>                         |                      |
| D-Val       | 1     | 171.4, C              |                                   |                                                                    |                                                                                         |                      |
|             | 2     | 56.7, CH              | 4.20, t (8.4)                     | NH <sub>D-Val</sub> , H-3 <sub>D-Val</sub>                         | C-1 <sub>Thr</sub> , C-1 <sub>D-Val</sub> , C-3 <sub>D-Val</sub> , C-5 <sub>D-Val</sub> | H-4 <sub>D-Val</sub> |
|             | 3     | 30.2, CH              | 1.86, m                           | H-2 <sub>D-Val</sub> , H-4 <sub>D-Val</sub> , H-5 <sub>D-Val</sub> | C-2 <sub>D-Val</sub> , C-4 <sub>D-Val</sub>                                             |                      |
|             | 4     | 18.9, CH <sub>3</sub> | 0.81, d (6.6)                     | H-3 <sub>D-Val</sub>                                               | C-2 <sub>D-Val</sub> , C-3 <sub>D-Val</sub>                                             | H-2 <sub>D-Val</sub> |
|             | 5     | 18.5, CH <sub>3</sub> | 0.79, d (6.7)                     | H-3 <sub>D-Val</sub>                                               | C-2 <sub>D-Val</sub> , C-3 <sub>D-Val</sub>                                             |                      |
|             | NH    |                       | 7.05, d (8.6)                     | H-2 <sub>D-Val</sub>                                               | C-1 <sub>Thr</sub> , C-2 <sub>D-Val</sub> , C-3 <sub>D-Val</sub>                        | NH <sub>Thr</sub>    |
| chromophore | no.   | $\delta_C$ , type     | $\delta_H$ mult ( <i>J</i> , Hz)  | COSY                                                               | HMBC                                                                                    | NOESY                |
|             | 1     | 100.5, C              |                                   |                                                                    |                                                                                         |                      |
|             | 2     | 133.9, C              |                                   |                                                                    |                                                                                         |                      |
|             | 3     | 144.3, C              |                                   |                                                                    |                                                                                         |                      |
|             | 4     | 112.0, C              |                                   |                                                                    |                                                                                         |                      |
|             | 4a    | 140.4, C              |                                   |                                                                    |                                                                                         |                      |
|             | 5a    | 141.6, C              |                                   |                                                                    |                                                                                         |                      |
|             | 6     | 127.9, C              |                                   |                                                                    |                                                                                         |                      |
|             | 7     | 122.3, CH             | 6.54, d (8.2)                     | H-8                                                                | C-5a, C-9, C-9a, C-11                                                                   | H-11                 |
|             | 8     | 122.4, CH             | 7.57, d (7.7)                     | H-7                                                                | C-6, C-9a, C-13                                                                         | NH <sub>Thr</sub>    |
|             | 9     | 112.9, C              |                                   |                                                                    |                                                                                         |                      |
|             | 9a    | 132.9, C              |                                   |                                                                    |                                                                                         |                      |
|             | 10a   | 132.9, C              |                                   |                                                                    |                                                                                         |                      |
|             | 11    | 15.3, CH <sub>3</sub> | 2.13, s                           |                                                                    | C-5a, C-6, C-7                                                                          | H-7                  |
|             | 12    | 9.1, CH <sub>3</sub>  | 2.26, s                           |                                                                    | C-3, C-4, C-4a                                                                          |                      |
|             | 13    | 168.3, C              |                                   |                                                                    |                                                                                         |                      |
|             | 14    | 167.4, C              |                                   |                                                                    |                                                                                         |                      |
|             | 15    | 163.1, C              |                                   |                                                                    |                                                                                         |                      |
|             | 16    | 14.6, CH <sub>3</sub> | 2.67, s                           |                                                                    | C-2, C-3, C-15                                                                          |                      |
|             | 10-NH |                       | 11.95, s                          |                                                                    | C-1, C-4a, C-5a, C-9, C-9a, C-10a                                                       |                      |

<sup>a</sup>600 MHz for <sup>1</sup>H NMR and 150 MHz for <sup>13</sup>C NMR. <sup>b</sup>Numbers of attached protons were determined by analysis of 2D spectra.

**Table S3. NMR data for compound 3 in CDCl<sub>3</sub>**

| $\alpha$ -ring | no. | $\delta_C$ , type     | $\delta_H$ mult ( <i>J</i> , Hz)  | COSY                                                               | HMBC                                                                                                             |
|----------------|-----|-----------------------|-----------------------------------|--------------------------------------------------------------------|------------------------------------------------------------------------------------------------------------------|
| Thr            | 1   | 168.8, C              |                                   |                                                                    |                                                                                                                  |
|                | 2   | 55.1, CH              | 5.11, d (9.8)                     | NH <sub>Thr</sub>                                                  | C-1 <sub>Thr</sub> , C-3 <sub>Thr</sub> , C-4 <sub>Thr</sub>                                                     |
|                | 3   | 70.5, CH              | 5.75, d (6.2)                     | H-4 <sub>Thr</sub>                                                 | C-1 <sub>MeVal</sub> , C-4 <sub>Thr</sub>                                                                        |
|                | 4   | 17.3, CH <sub>3</sub> | 1.13, d (6.5)                     | H-3 <sub>Thr</sub>                                                 | C-2 <sub>Thr</sub> , C-3 <sub>Thr</sub>                                                                          |
|                | NH  |                       | 8.90, d (10.1)                    | H-2 <sub>Thr</sub>                                                 | C-13                                                                                                             |
| MeVal          | 1   | 169.0, C              |                                   |                                                                    |                                                                                                                  |
|                | 2   | 60.4, CH              | 4.69, d (10.8)                    | H-3 <sub>MeVal</sub>                                               | C-1 <sub>MeVal</sub> , C-3 <sub>MeVal</sub> , C-4 <sub>MeVal</sub> , C-5 <sub>MeVal</sub> , NMe <sub>MeVal</sub> |
|                | 3   | 27.9, CH              | 2.12, m                           | H-2 <sub>MeVal</sub> , H-4 <sub>MeVal</sub> , H-5 <sub>MeVal</sub> | C-2 <sub>MeVal</sub> , C-4 <sub>MeVal</sub>                                                                      |
|                | 4   | 18.9, CH <sub>3</sub> | 0.82, d (6.5)                     | H-3 <sub>MeVal</sub>                                               | C-2 <sub>MeVal</sub> , C-3 <sub>MeVal</sub>                                                                      |
|                | 5   | 18.3, CH <sub>3</sub> | 0.73, d (6.6)                     | H-3 <sub>MeVal</sub>                                               | C-2 <sub>MeVal</sub> , C-3 <sub>MeVal</sub> , C-4 <sub>MeVal</sub>                                               |
|                | NMe | 30.5, CH <sub>3</sub> | 3.16, s                           |                                                                    | C-1 <sub>Sar</sub> , C-2 <sub>Sar</sub> , C-2 <sub>MeVal</sub>                                                   |
| Sar            | 1   | 170.6, C              |                                   |                                                                    |                                                                                                                  |
|                | 2   | 49.6, CH <sub>2</sub> | 4.71, d (14.0);<br>3.01, d (14.0) |                                                                    | C-1 <sub>Sar</sub> , C-1 <sub>Pro</sub> , NMe <sub>Sar</sub>                                                     |
|                | NMe | 38.8, CH <sub>3</sub> | 3.37, s                           |                                                                    | C-1 <sub>Pro</sub> , C-2 <sub>Sar</sub>                                                                          |
| Pro            | 1   | 173.0, C              |                                   |                                                                    |                                                                                                                  |
|                | 2   | 55.7, CH              | 4.81, d (6.7)                     | H-3 <sub>Pro</sub>                                                 | C-1 <sub>Pro</sub> , C-3 <sub>Pro</sub> , C-4 <sub>Pro</sub> , C-5 <sub>Pro</sub>                                |
|                | 3   | 28.5, CH <sub>2</sub> | 1.99, m; 1.86, m                  | H-2 <sub>Pro</sub> , H-4 <sub>Pro</sub>                            | C-1 <sub>Pro</sub> , C-2 <sub>Pro</sub> , C-4 <sub>Pro</sub> , C-5 <sub>Pro</sub>                                |
|                | 4   | 24.8, CH <sub>2</sub> | 2.30, m; 1.90, m                  | H-3 <sub>Pro</sub> , H-5 <sub>Pro</sub>                            | C-3 <sub>Pro</sub> , C-5 <sub>Pro</sub>                                                                          |
|                | 5   | 47.1, CH <sub>2</sub> | 4.05, m<br>3.46, td (7.1, 9.6)    | H-4 <sub>Pro</sub>                                                 | C-2 <sub>Pro</sub> , C-3 <sub>Pro</sub> , C-4 <sub>Pro</sub>                                                     |
| D-Val          | 1   | 171.3, C              |                                   |                                                                    |                                                                                                                  |
|                | 2   | 56.2, CH              | 4.30, t (7.6)                     | NH <sub>D-Val</sub> , H-3 <sub>D-Val</sub>                         | C-1 <sub>D-Val</sub> , C-1 <sub>Thr</sub> , C-4 <sub>D-Val</sub> , C-5 <sub>D-Val</sub>                          |
|                | 3   | 29.8, CH              | 1.84, m                           | H-2 <sub>D-Val</sub> , H-4 <sub>D-Val</sub> , H-5 <sub>D-Val</sub> | C-2 <sub>D-Val</sub> , C-4 <sub>D-Val</sub> , C-5 <sub>D-Val</sub>                                               |

|                |     |                       |                                   |                                                                       |                                                                                                                       |
|----------------|-----|-----------------------|-----------------------------------|-----------------------------------------------------------------------|-----------------------------------------------------------------------------------------------------------------------|
|                | 4   | 19.4, CH <sub>3</sub> | 0.86, d (6.7)                     | H-3 <sub>D-Val</sub>                                                  | C-2 <sub>D-Val</sub> , C-3 <sub>D-Val</sub>                                                                           |
|                | 5   | 18.2, CH <sub>3</sub> | 0.80, d (6.3)                     | H-3 <sub>D-Val</sub>                                                  | C-2 <sub>D-Val</sub> , C-3 <sub>D-Val</sub> , C-4 <sub>D-Val</sub>                                                    |
|                | NH  |                       | 6.37, d (8.2)                     | H-2 <sub>D-Val</sub>                                                  | C-1 <sub>Thr</sub>                                                                                                    |
| <i>β</i> -ring | no. | $\delta_C$ , type     | $\delta_H$ mult ( <i>J</i> , Hz)  | COSY                                                                  | HMBC                                                                                                                  |
| Thr            | 1   | 169.5, C              |                                   |                                                                       |                                                                                                                       |
|                | 2   | 55.8, CH              | 4.93, d (8.6)                     | NH <sub>Thr</sub>                                                     | C-1 <sub>Thr</sub> , C-3 <sub>Thr</sub> , C-4 <sub>Thr</sub> , 14                                                     |
|                | 3   | 70.1, CH              | 5.66, q (6.7)                     | H-4 <sub>Thr</sub>                                                    | C-1 <sub>Me-Val</sub>                                                                                                 |
|                | 4   | 17.3, CH <sub>3</sub> | 1.22, d (6.5)                     | H-3 <sub>Thr</sub>                                                    | C-2 <sub>Thr</sub> , C-3 <sub>Thr</sub>                                                                               |
|                | NH  |                       | 9.84, d (8.6)                     | H-2 <sub>Thr</sub>                                                    | C-2 <sub>Thr</sub> , C-3 <sub>Thr</sub> , C-14                                                                        |
| MeVal          | 1   | 169.3, C              |                                   |                                                                       |                                                                                                                       |
|                | 2   | 61.0, CH              | 4.89, d (11.1)                    | H-3 <sub>Me-Val</sub>                                                 | C-1 <sub>Me-Val</sub> , C-3 <sub>Me-Val</sub> , C-4 <sub>Me-Val</sub> , C-5 <sub>Me-Val</sub> , NMe <sub>Me-Val</sub> |
|                | 3   | 27.5, CH              | 2.15, m                           | H-2 <sub>Me-Val</sub> , H-4 <sub>Me-Val</sub> , H-5 <sub>Me-Val</sub> | C-2 <sub>Me-Val</sub>                                                                                                 |
|                | 4   | 19.4, CH <sub>3</sub> | 0.80, d (6.3)                     | H-3 <sub>Me-Val</sub>                                                 | C-2 <sub>Me-Val</sub> , C-3 <sub>Me-Val</sub> , C-5 <sub>Me-Val</sub>                                                 |
|                | 5   | 18.4, CH <sub>3</sub> | 0.68, d (6.7)                     | H-3 <sub>Me-Val</sub>                                                 | C-2 <sub>Me-Val</sub> , C-3 <sub>Me-Val</sub> , C-4 <sub>Me-Val</sub>                                                 |
|                | NMe | 30.6, CH <sub>3</sub> | 3.04, s                           |                                                                       | C-1 <sub>Sar</sub> , C-2 <sub>Me-Val</sub>                                                                            |
| Sar            | 1   | 169.0, C              |                                   |                                                                       |                                                                                                                       |
|                | 2   | 49.2, CH <sub>2</sub> | 4.99, d (14.3);<br>3.04, d (14.3) |                                                                       | C-1 <sub>OPro</sub> , C-1 <sub>Sar</sub> , NMe <sub>Sar</sub>                                                         |
|                | NMe | 37.4, CH <sub>3</sub> | 3.30, s                           |                                                                       | C-1 <sub>OPro</sub> , C-2 <sub>Sar</sub>                                                                              |
| OPro           | 1   | 171.3, C              |                                   |                                                                       |                                                                                                                       |
|                | 2   | 51.5, CH              | 5.40, d (6.3)                     | H-3 <sub>OPro</sub>                                                   | C-3 <sub>OPro</sub> , C-4 <sub>OPro</sub>                                                                             |
|                | 3   | 40.6, CH <sub>2</sub> | 2.51, d (8.0);<br>2.50, d (2.6)   | H-2 <sub>OPro</sub>                                                   | C-1 <sub>OPro</sub> , C-2 <sub>OPro</sub> , C-4 <sub>OPro</sub>                                                       |
|                | 4   | 207.1, C              |                                   |                                                                       |                                                                                                                       |
|                | 5   | 52.7, CH <sub>2</sub> | 4.34, d (17.1);<br>3.88, d (17.1) |                                                                       | C-2 <sub>OPro</sub> , C-3 <sub>OPro</sub> , C-4 <sub>OPro</sub>                                                       |
| D-Val          | 1   | 171.3, C              |                                   |                                                                       |                                                                                                                       |
|                | 2   | 56.7, CH              | 4.22, t (8.3)                     | NH <sub>D-Val</sub> , H-3 <sub>D-Val</sub>                            | C-1 <sub>Thr</sub> , C-1 <sub>D-Val</sub> , C-3 <sub>D-Val</sub> , C-4 <sub>D-Val</sub> , C-5 <sub>D-Val</sub>        |

|             |     |                       |                                   |                                                                     |                                                                   |
|-------------|-----|-----------------------|-----------------------------------|---------------------------------------------------------------------|-------------------------------------------------------------------|
|             | 3   | 30.2, CH              | 1.89, m                           | H-2 <sub>D</sub> -Val, H-4 <sub>D</sub> -Val, H-5 <sub>D</sub> -Val | C-1 <sub>D</sub> -Val, C-2 <sub>D</sub> -Val                      |
|             | 4   | 19.3, CH <sub>3</sub> | 0.84, d (6.7)                     | H-3 <sub>D</sub> -Val                                               | C-2 <sub>D</sub> -Val, C-3 <sub>D</sub> -Val                      |
|             | 5   | 18.2, CH <sub>3</sub> | 0.83, d (6.4)                     | H-3 <sub>D</sub> -Val                                               | C-2 <sub>D</sub> -Val, C-3 <sub>D</sub> -Val                      |
|             | NH  |                       | 7.15, d (8.3)                     | H-2 <sub>D</sub> -Val                                               | C-1 <sub>Thr</sub> , C-2 <sub>D</sub> -Val, C-3 <sub>D</sub> -Val |
| chromophore | no. | $\delta_C$ , type     | $\delta_H$ mult ( <i>J</i> , Hz)  | COSY                                                                | HMBC                                                              |
|             | 1   | 100.6, C              |                                   |                                                                     |                                                                   |
|             | 2   | 133.2, C              |                                   |                                                                     |                                                                   |
|             | 3   | 144.6, C              |                                   |                                                                     |                                                                   |
|             | 4   | 112.1, C              |                                   |                                                                     |                                                                   |
|             | 4a  | 140.8, C              |                                   |                                                                     |                                                                   |
|             | 5a  | 141.5, C              |                                   |                                                                     |                                                                   |
|             | 6   | 127.9, C              |                                   |                                                                     |                                                                   |
|             | 7   | 122.4, CH             | 6.54, d (8.3)                     | H-8                                                                 | C-5a, C-6, C-8, C-9, C-9a, C-11                                   |
|             | 8   | 122.5, CH             | 7.55, d (8.2)                     | H-7                                                                 | C-6, C-9, C-9a, C-13                                              |
|             | 9   | 113.0, C              |                                   |                                                                     |                                                                   |
|             | 9a  | 132.7, C              |                                   |                                                                     |                                                                   |
|             | 10a | 133.6, C              |                                   |                                                                     |                                                                   |
|             | 11  | 15.3, CH <sub>3</sub> | 2.11, s                           |                                                                     | C-5a, C-6, C-7                                                    |
|             | 12  | 9.2, CH <sub>3</sub>  | 2.21, s                           |                                                                     | C-3, C-4, C-4a                                                    |
|             | 13  | 168.3, C              |                                   |                                                                     |                                                                   |
|             | 14  | 167.1, C              |                                   |                                                                     |                                                                   |
|             | 15  | 163.9, C              |                                   |                                                                     |                                                                   |
|             | 16  | 34.1, CH <sub>2</sub> | 4.47, d (15.3);<br>4.37, d (15.1) |                                                                     | C-15, C-17, C-18, C-22                                            |
|             | 17  | 133.7                 |                                   |                                                                     |                                                                   |
|             | 18  | 130.5, CH             | 7.50, d (8.5)                     | H-19                                                                | C-15, C-16, C-19, C-20, C-22                                      |
|             | 19  | 122.6, CH             | 7.08, d (8.5)                     | H-18                                                                | C-17, C-20, C-21                                                  |
|             | 20  | 141.2                 |                                   |                                                                     |                                                                   |

|       |                       |               |    |                              |
|-------|-----------------------|---------------|----|------------------------------|
| 21    | 122.6, CH             | 7.08, d (8.5) | 22 | C-17, C-19, C-20             |
| 22    | 130.5, CH             | 7.50, d (8.5) | 21 | C-15, C-16, C-18, C-20, C-21 |
| 23    | 162.3, CH             | 8.37, s       |    | C-20, C-24                   |
| 24    | 32.1, CH <sub>3</sub> | 3.22, s       |    | C-20, C-23                   |
| 10-NH |                       | 11.94, s      |    | C-1, C-4a, C-5a, C-9, C-10a  |

<sup>a</sup>600 MHz for <sup>1</sup>H NMR and 150 MHz for <sup>13</sup>C NMR. <sup>b</sup>Numbers of attached protons were determined by analysis of 2D spectra.

**Table S4. NMR data for compound 4 in CDCl<sub>3</sub><sup>a</sup>**

| no. | $\delta_{\text{H}}$ mult ( <i>J</i> , Hz) | $\delta_{\text{C}}^{\text{b}}$ | HMBC                | COSY  |
|-----|-------------------------------------------|--------------------------------|---------------------|-------|
| 1   |                                           | 119.0, C                       |                     |       |
| 2   |                                           | 140.4, C                       |                     |       |
| 3   |                                           | 150.6, C                       |                     |       |
| 4   |                                           | 126.2, C                       |                     |       |
| 5   | 7.16, dd (7.9, 0.9)                       | 125.1, CH                      | 1, 3, 11            | 6, 11 |
| 6   | 7.90, d (7.9)                             | 126.9, CH                      | 2, 4                | 5     |
| 7   |                                           | 165.6, C                       | 6, 6a, 7a, 11a, 12a |       |
| 8   |                                           | 165.9, C                       |                     |       |
| 9   | 4.02, s                                   | 52.4, CH <sub>3</sub>          | 8                   |       |
| 10  | 2.73, s                                   | 14.9, CH <sub>3</sub>          | 2, 3, 7             |       |
| 11  | 2.56, s                                   | 15.5, CH <sub>3</sub>          | 3, 4, 5             | 5     |

<sup>a</sup>600 MHz for <sup>1</sup>H NMR and 150 MHz for <sup>13</sup>C NMR. <sup>b</sup>Numbers of attached protons were determined by analysis of 2D spectra.

**Fig. S1** Neighbour-joining tree based on 16S rRNA gene sequences of strain S22 and related strains in the family Streptomycete. Numbers at nodes refer to percentage bootstrap values (based on 1000 replicates; only values. 50 % are shown). Bar, 5 substitutions per 1000 nucleotide positions.

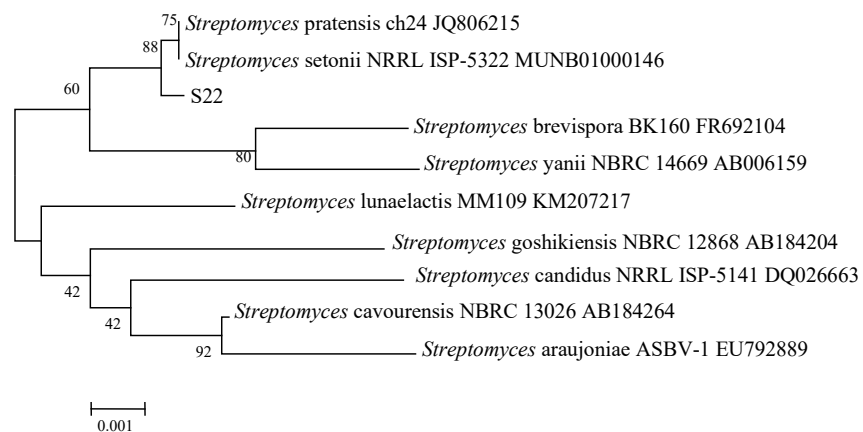

**Fig. S2** Chiral amino acid analysis of **1**.

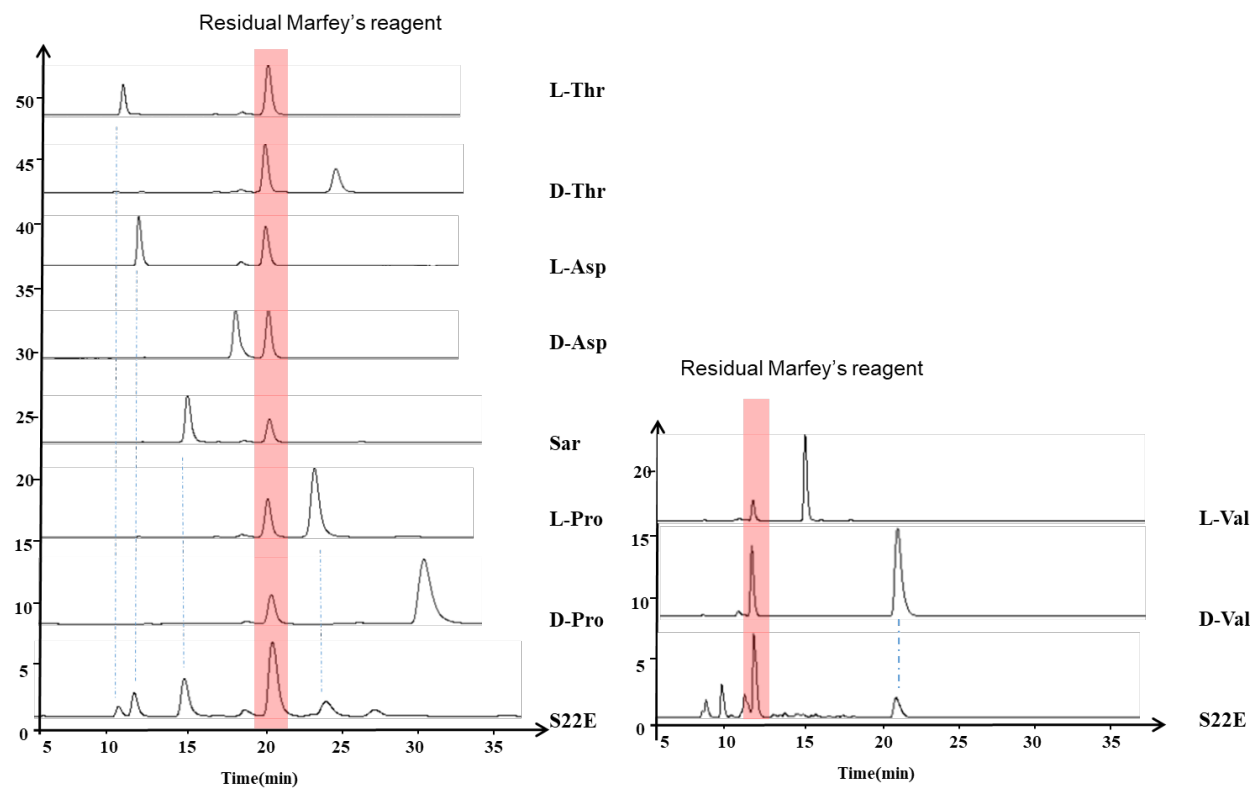

| Chromatographic condition |                                         |
|---------------------------|-----------------------------------------|
| Waters Symmetry           | C18 250mm × 4.6mm 5 $\mu$ m             |
| time                      | 40min                                   |
| wavelength                | 430nm                                   |
| Mobile phase              | H <sub>2</sub> O:MeOH:50 mM TEAP buffer |
| isocratic elution         | 50:25:25                                |
| flow velocity             | 1mL/min                                 |

| Chromatographic condition |                                         |
|---------------------------|-----------------------------------------|
| Waters Symmetry           | C18 250mm × 4.6mm 5 $\mu$ m             |
| time                      | 40min                                   |
| wavelength                | 430nm                                   |
| Mobile phase              | H <sub>2</sub> O:MeOH:50 mM TEAP buffer |
| gradient elution          | 0-10min, 50:30:20                       |
|                           | 10-30min, 20:50:30                      |
|                           | 30-40min, 0:10:90                       |
| flow velocity             | 1mL/min                                 |



**Fig. S3** UV spectrum of compound **1**.

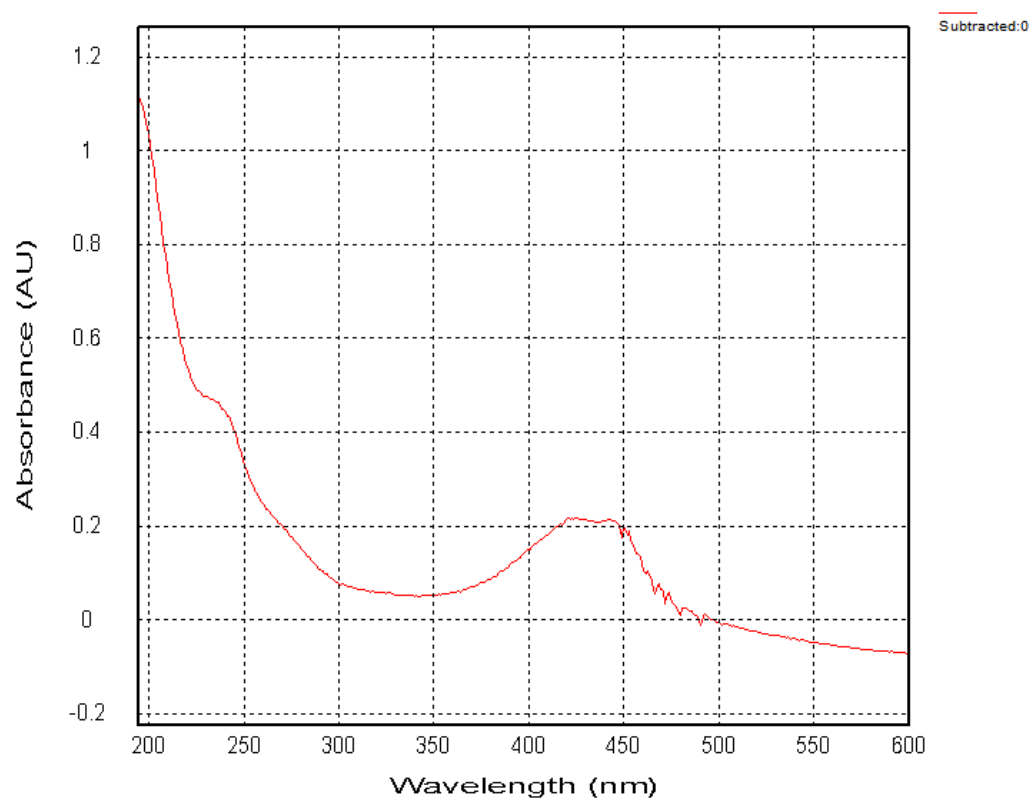

**Fig. S4** UV spectrum of compound **2**.

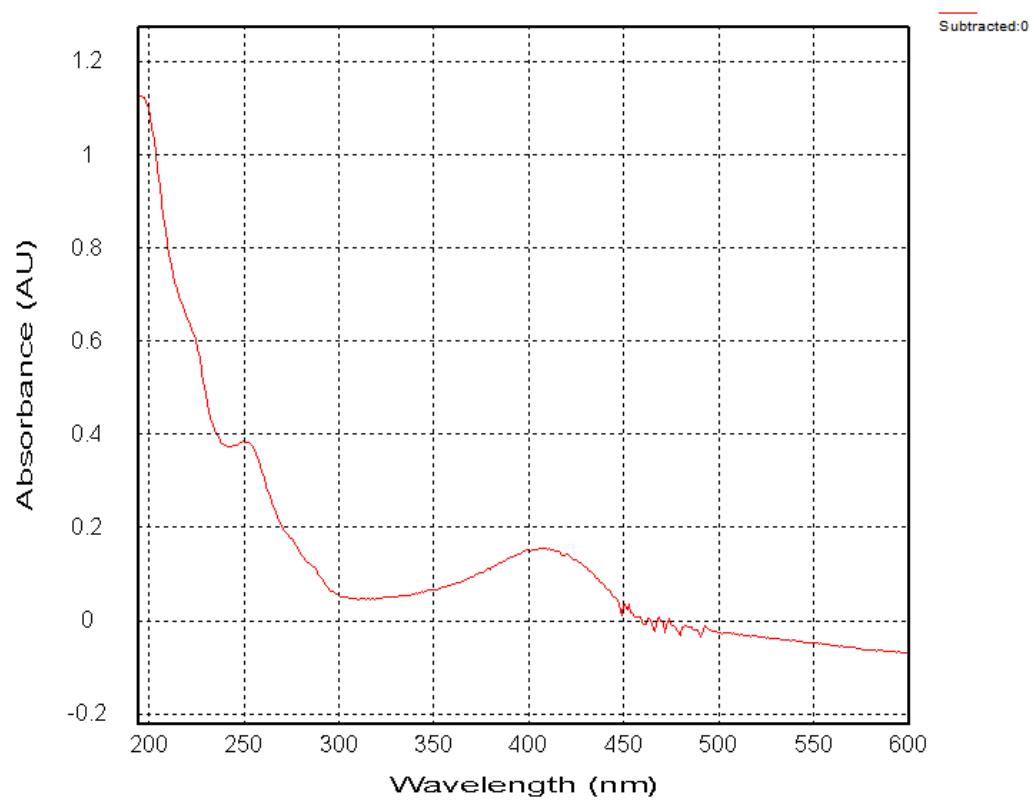

**Fig. S5** UV spectrum of compound **3**.

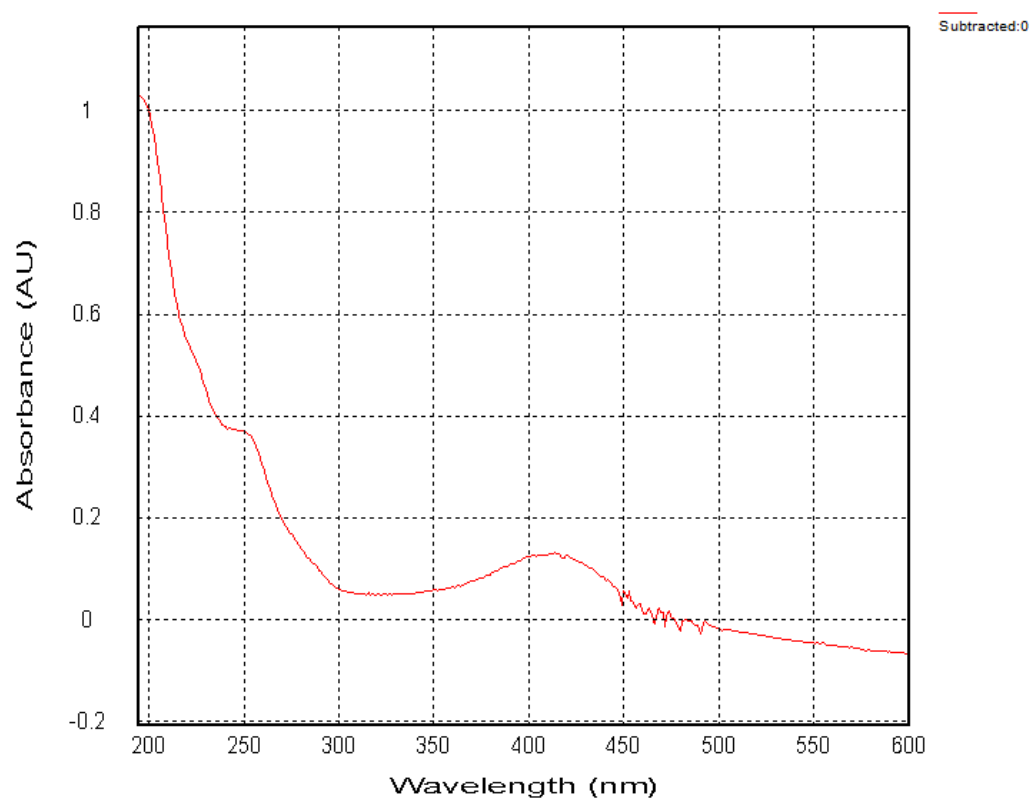

Fig. S6 CD spectrum of compound 1.

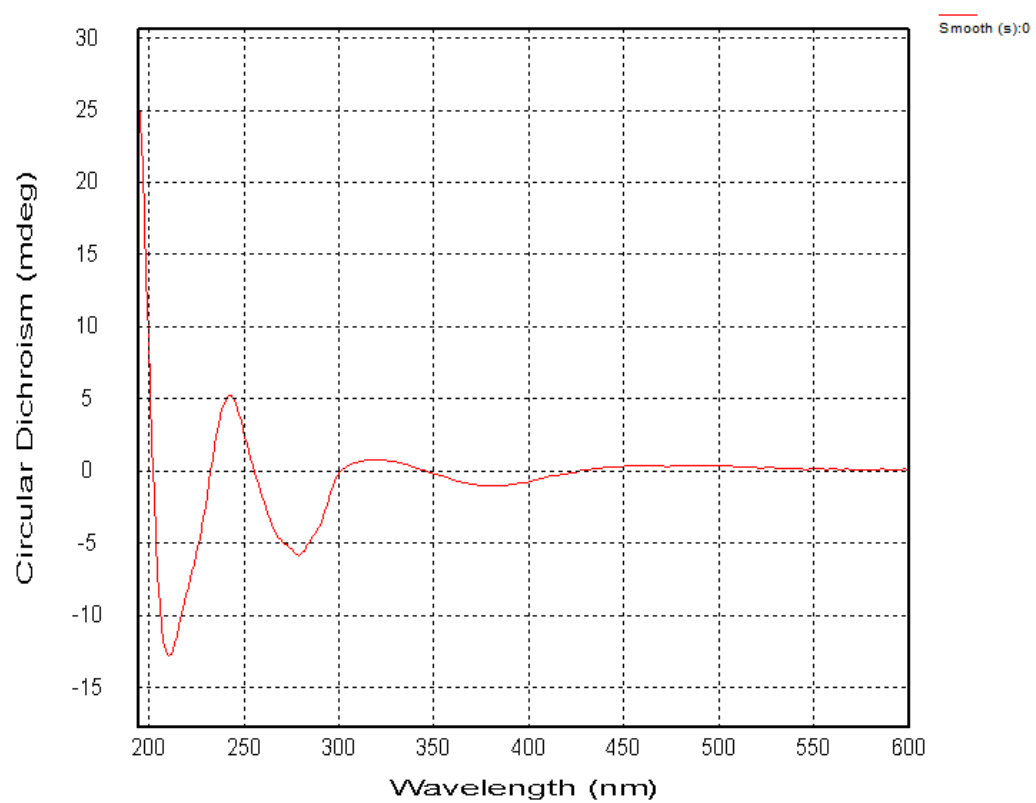

Fig. S7 CD spectrum of compound 2.

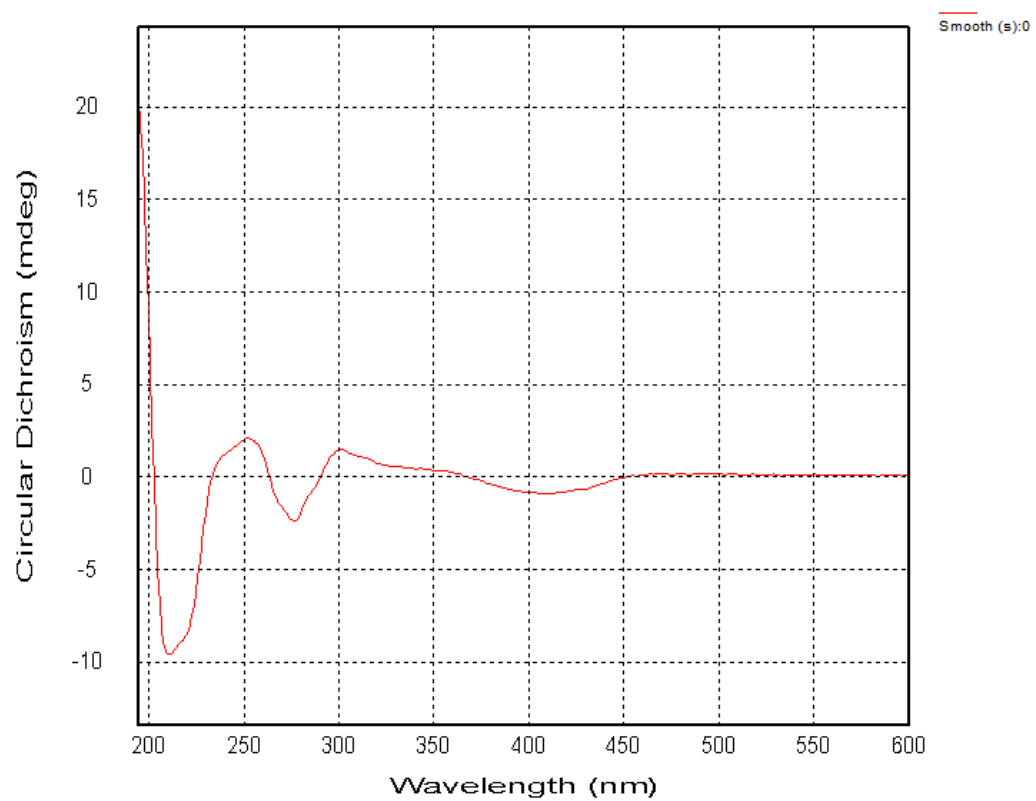

Fig. S8 CD spectrum of compound 3.

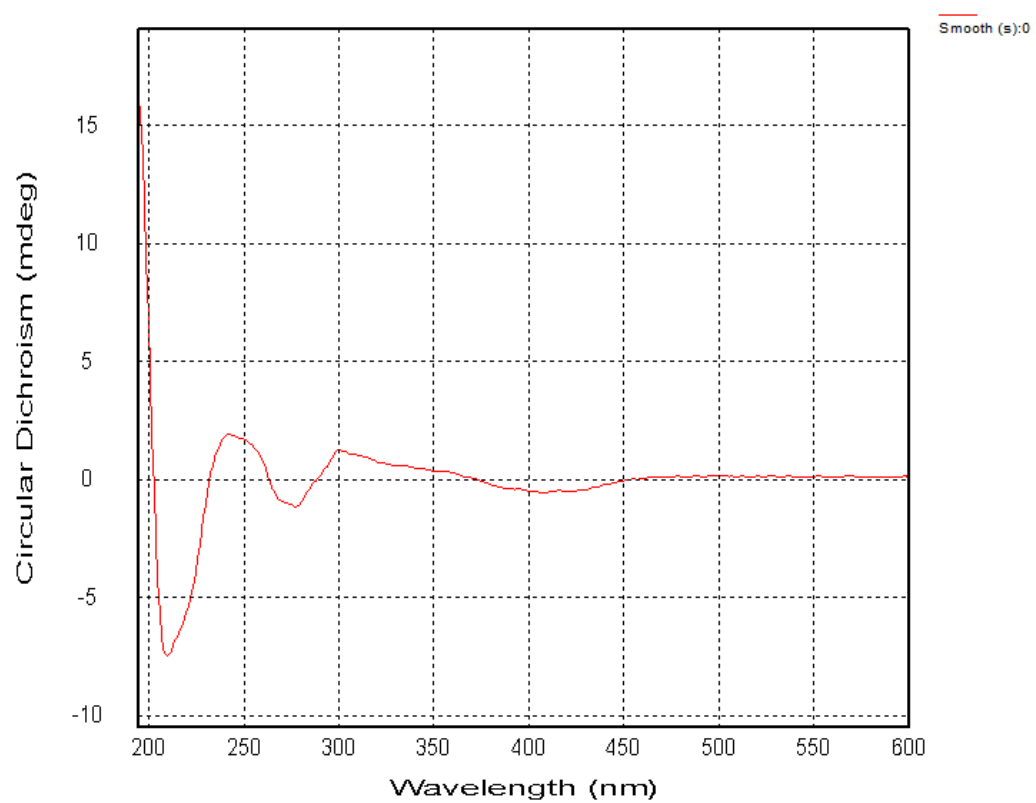

**Fig. S9** The dose-response curve of antibacterial activities for actinomycins 1–3.

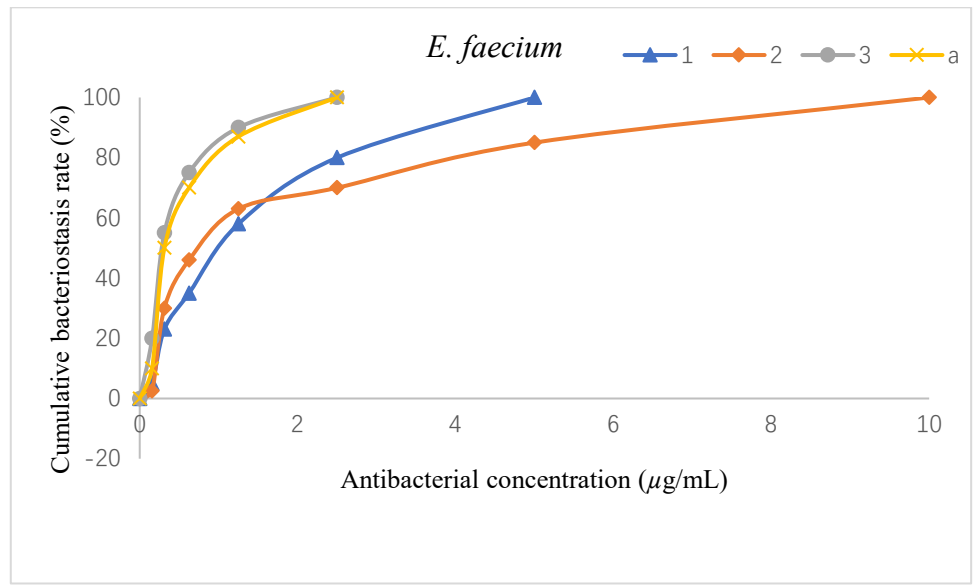

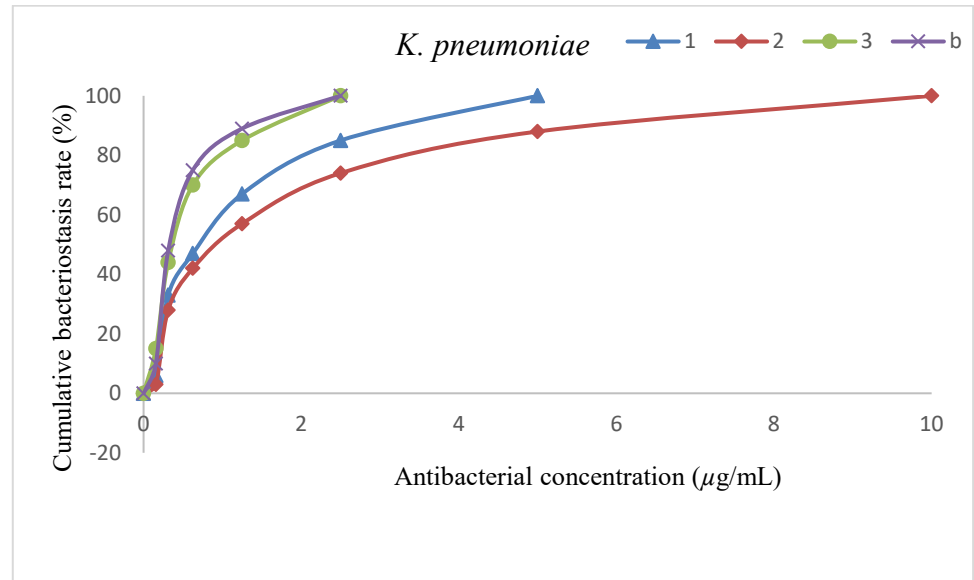



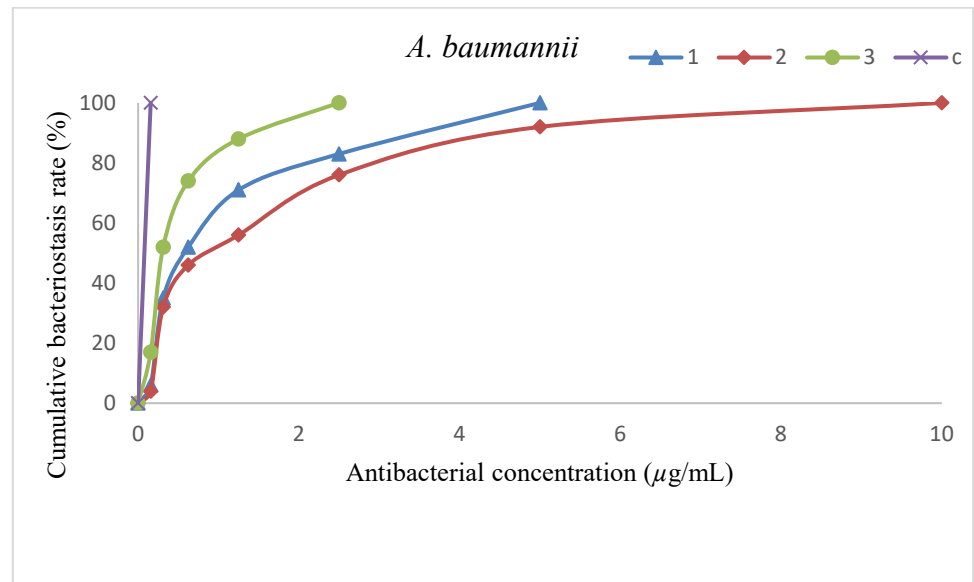

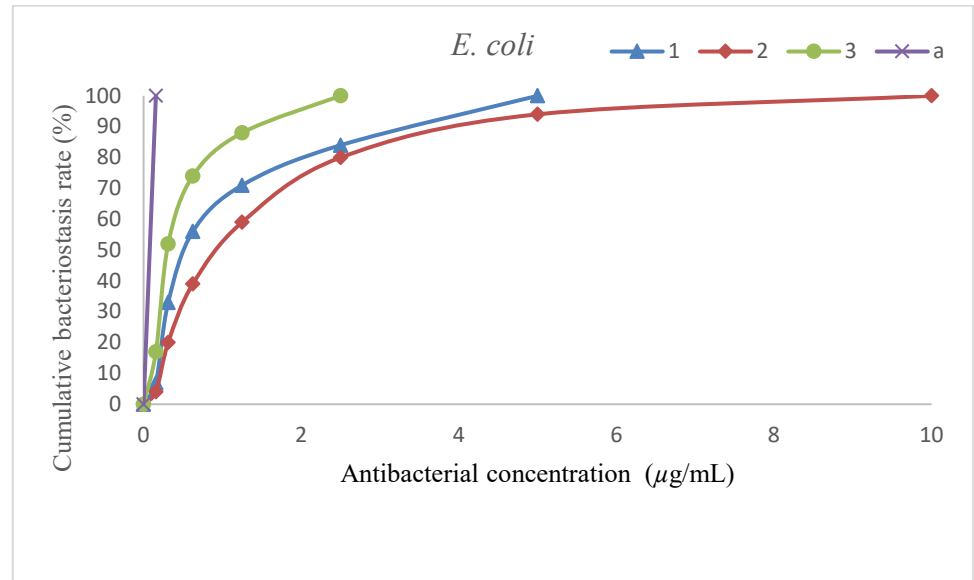

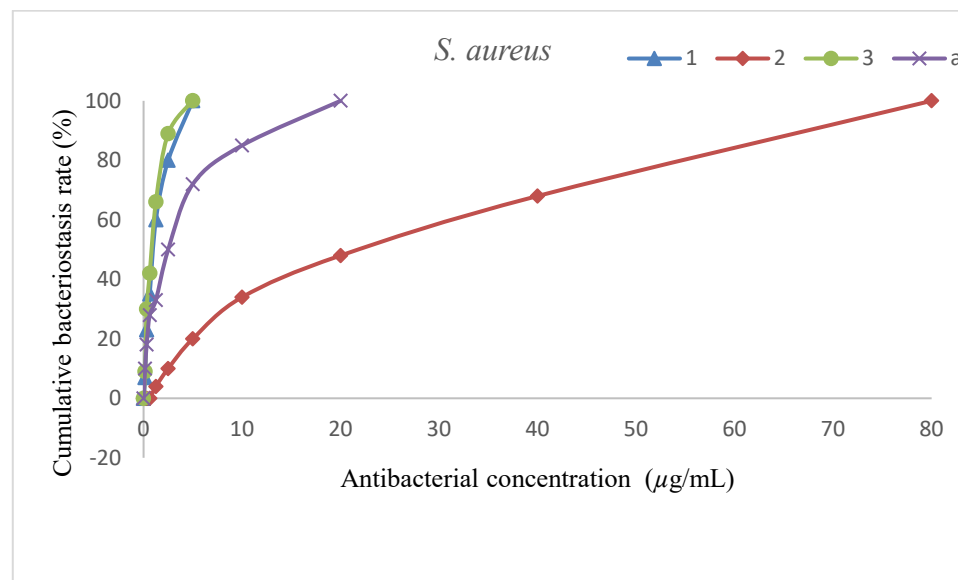

Fig. S10 <sup>1</sup>H NMR spectrum (600 MHz) of compound 1 in CDCl<sub>3</sub>.

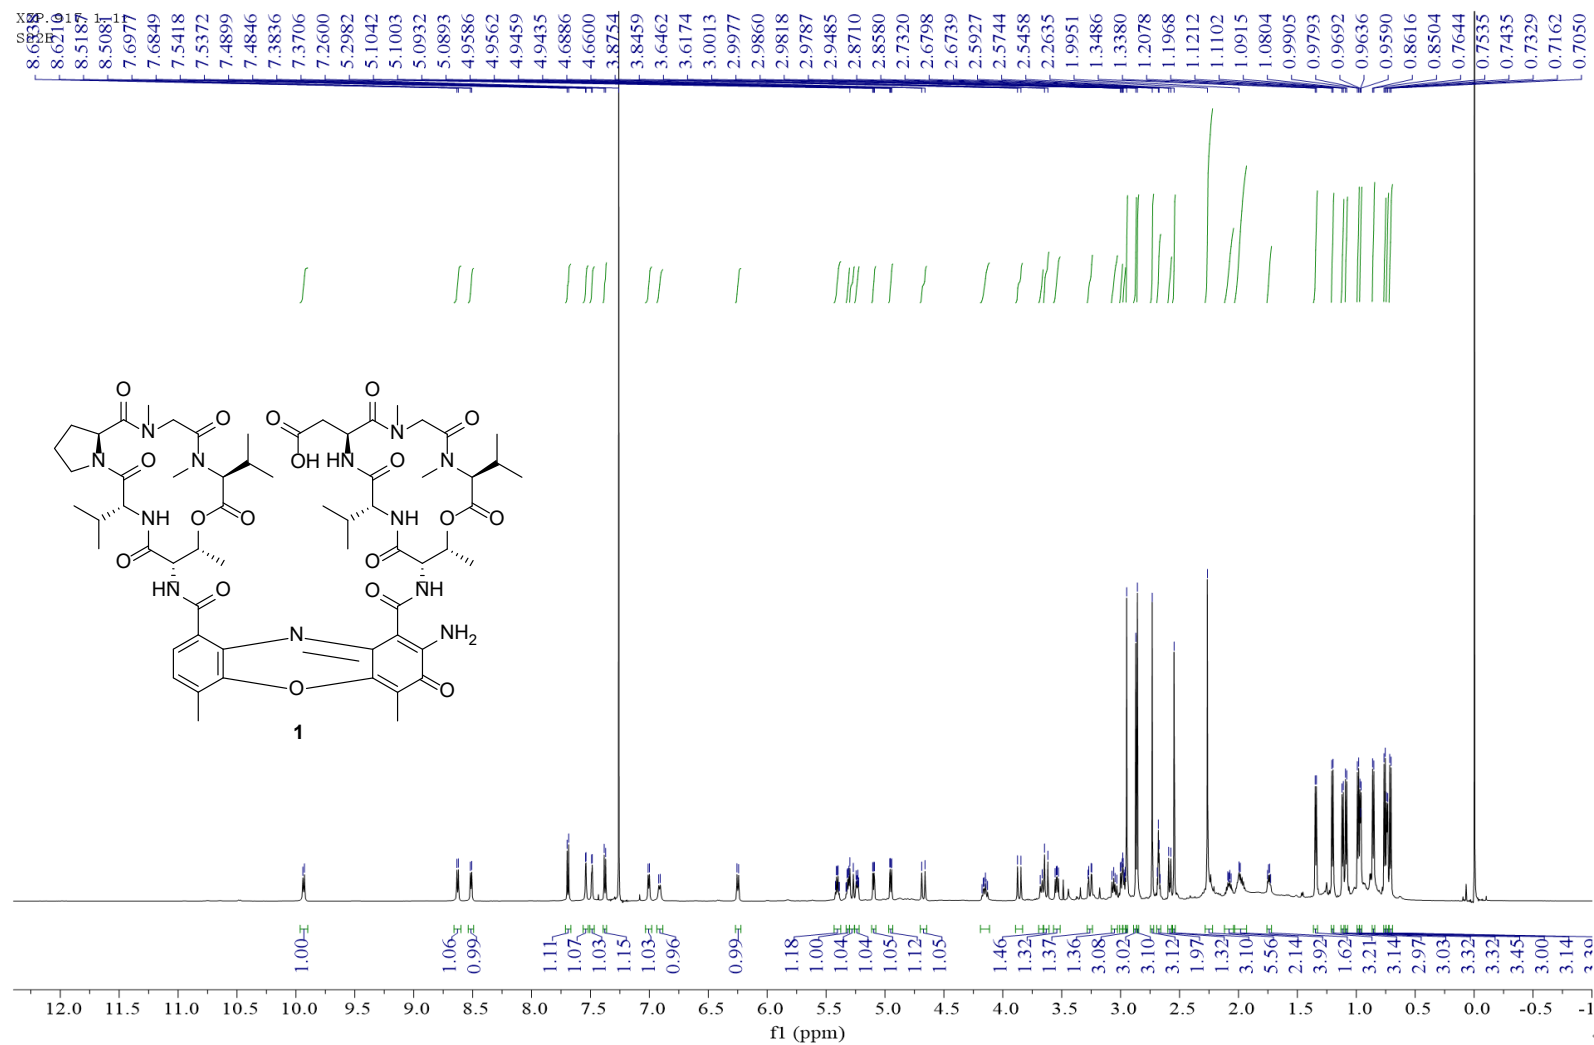

Fig. S11  $^{13}\text{C}\{^1\text{H}\}$  NMR spectrum (150 MHz) of compound **1** in  $\text{CDCl}_3$ .

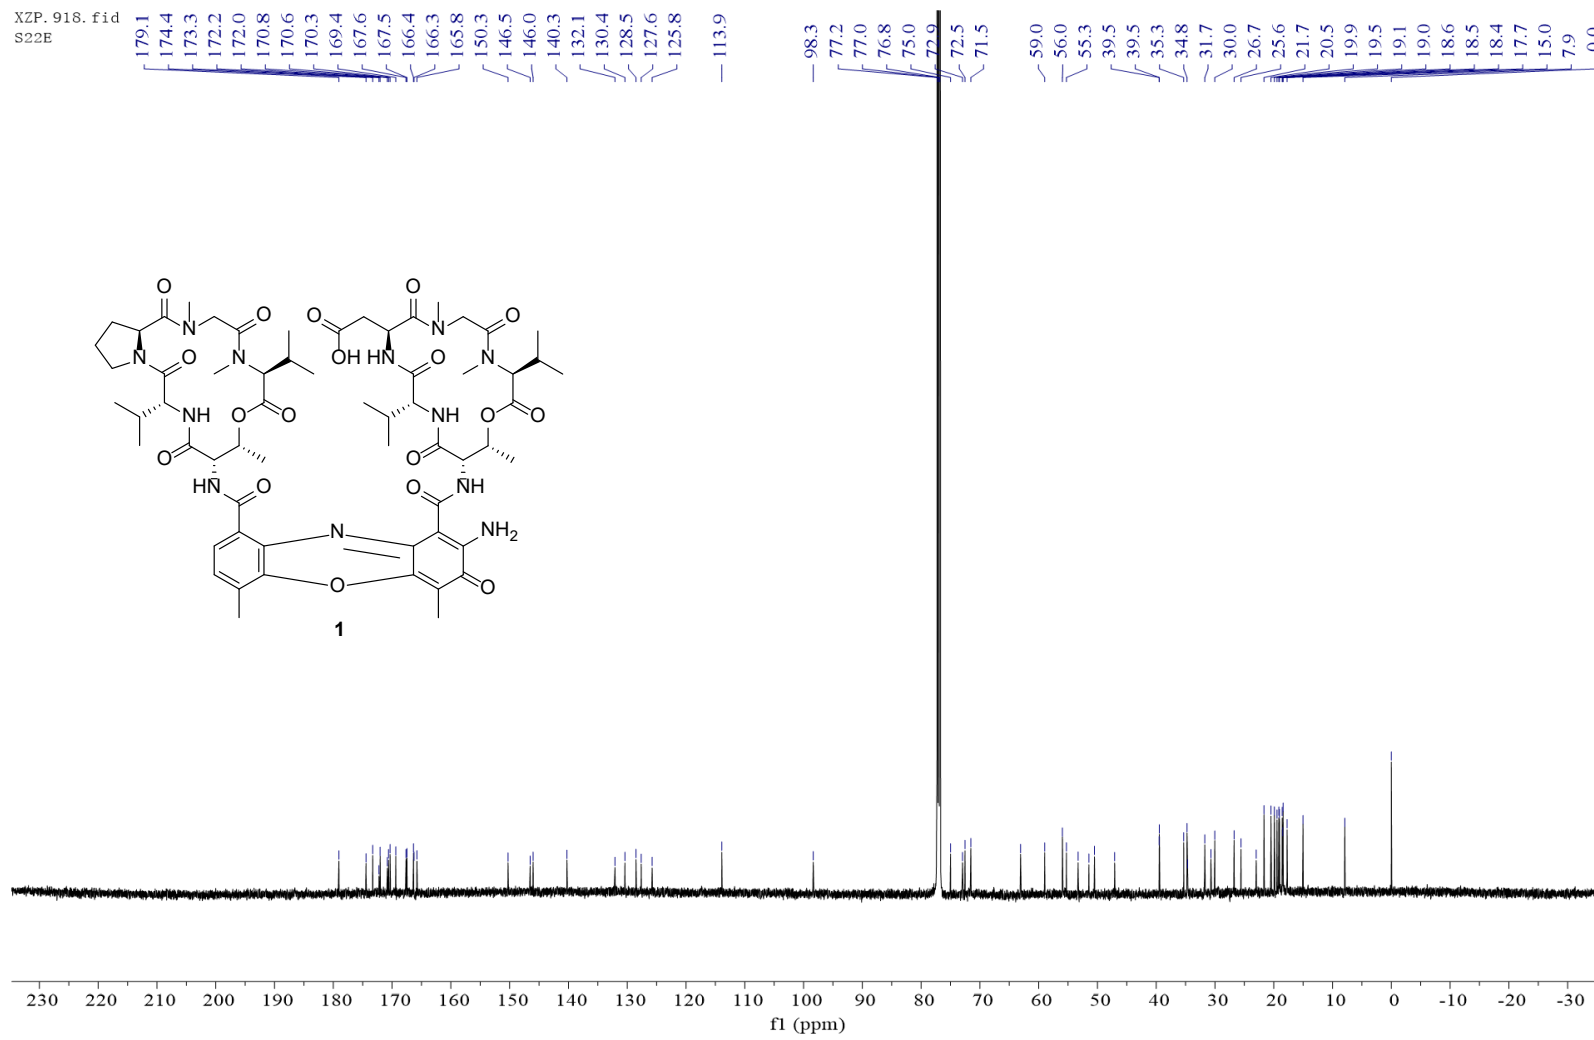

Fig. S12 DEPT-135 spectrum (150 MHz) of compound 1 in CDCl<sub>3</sub>.

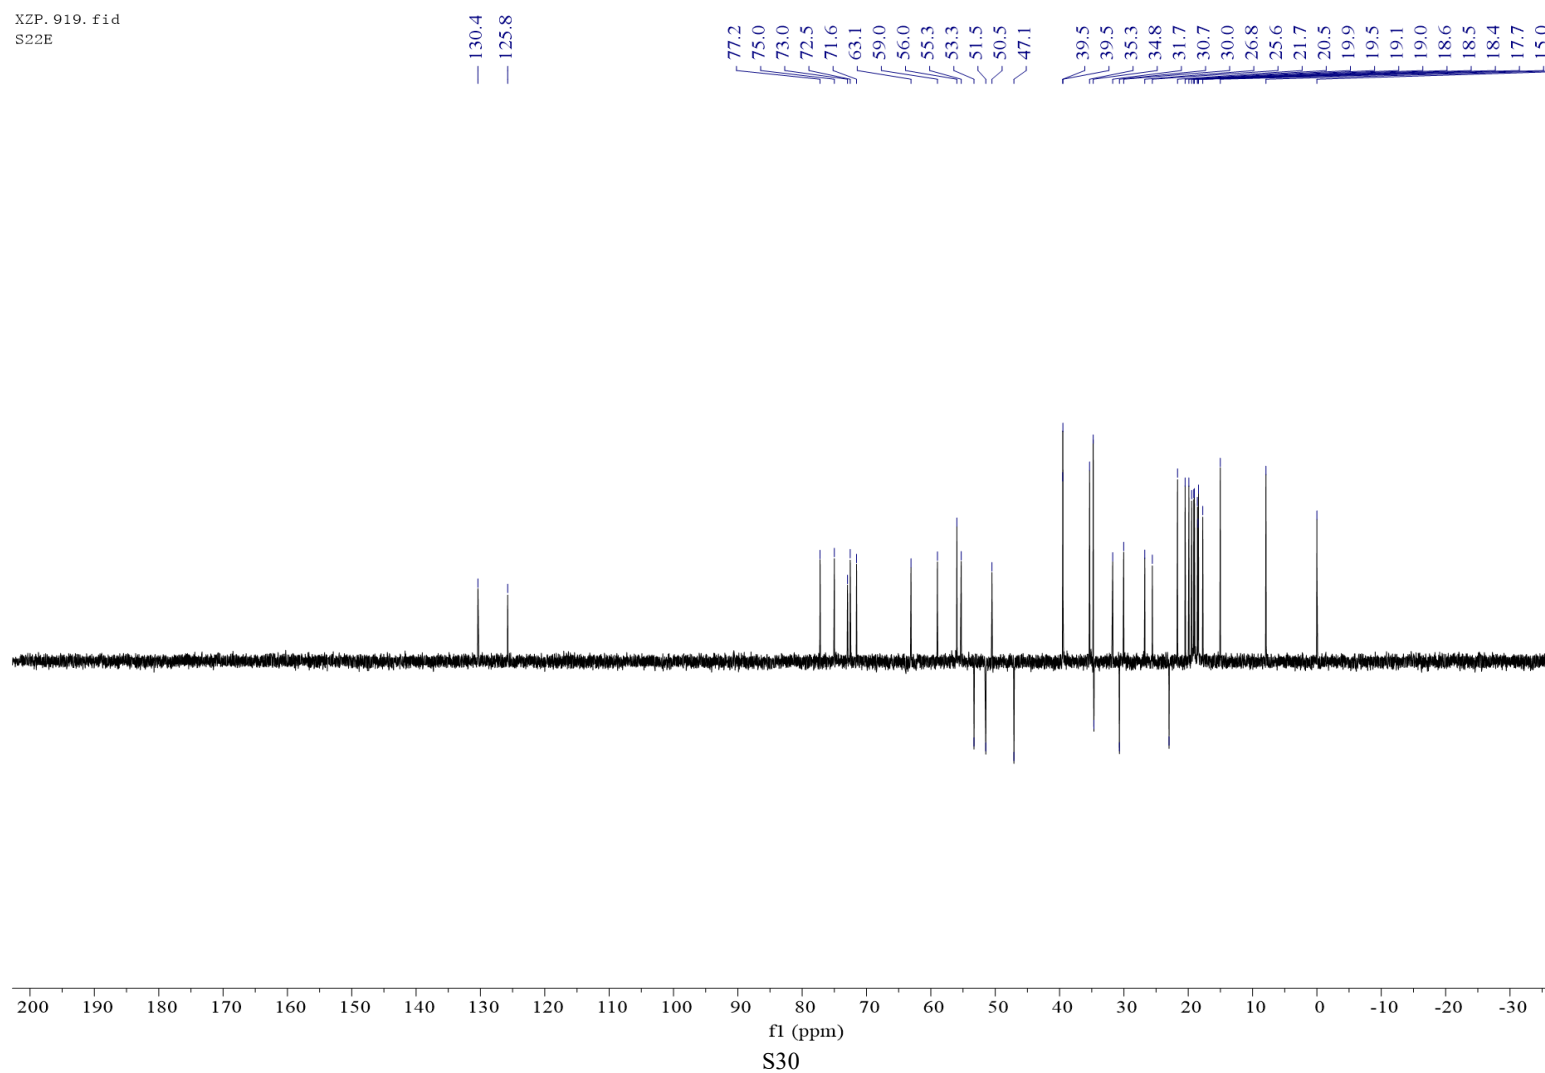

Fig. S13 COSY spectrum (600 MHz) of compound **1** in CDCl<sub>3</sub>.

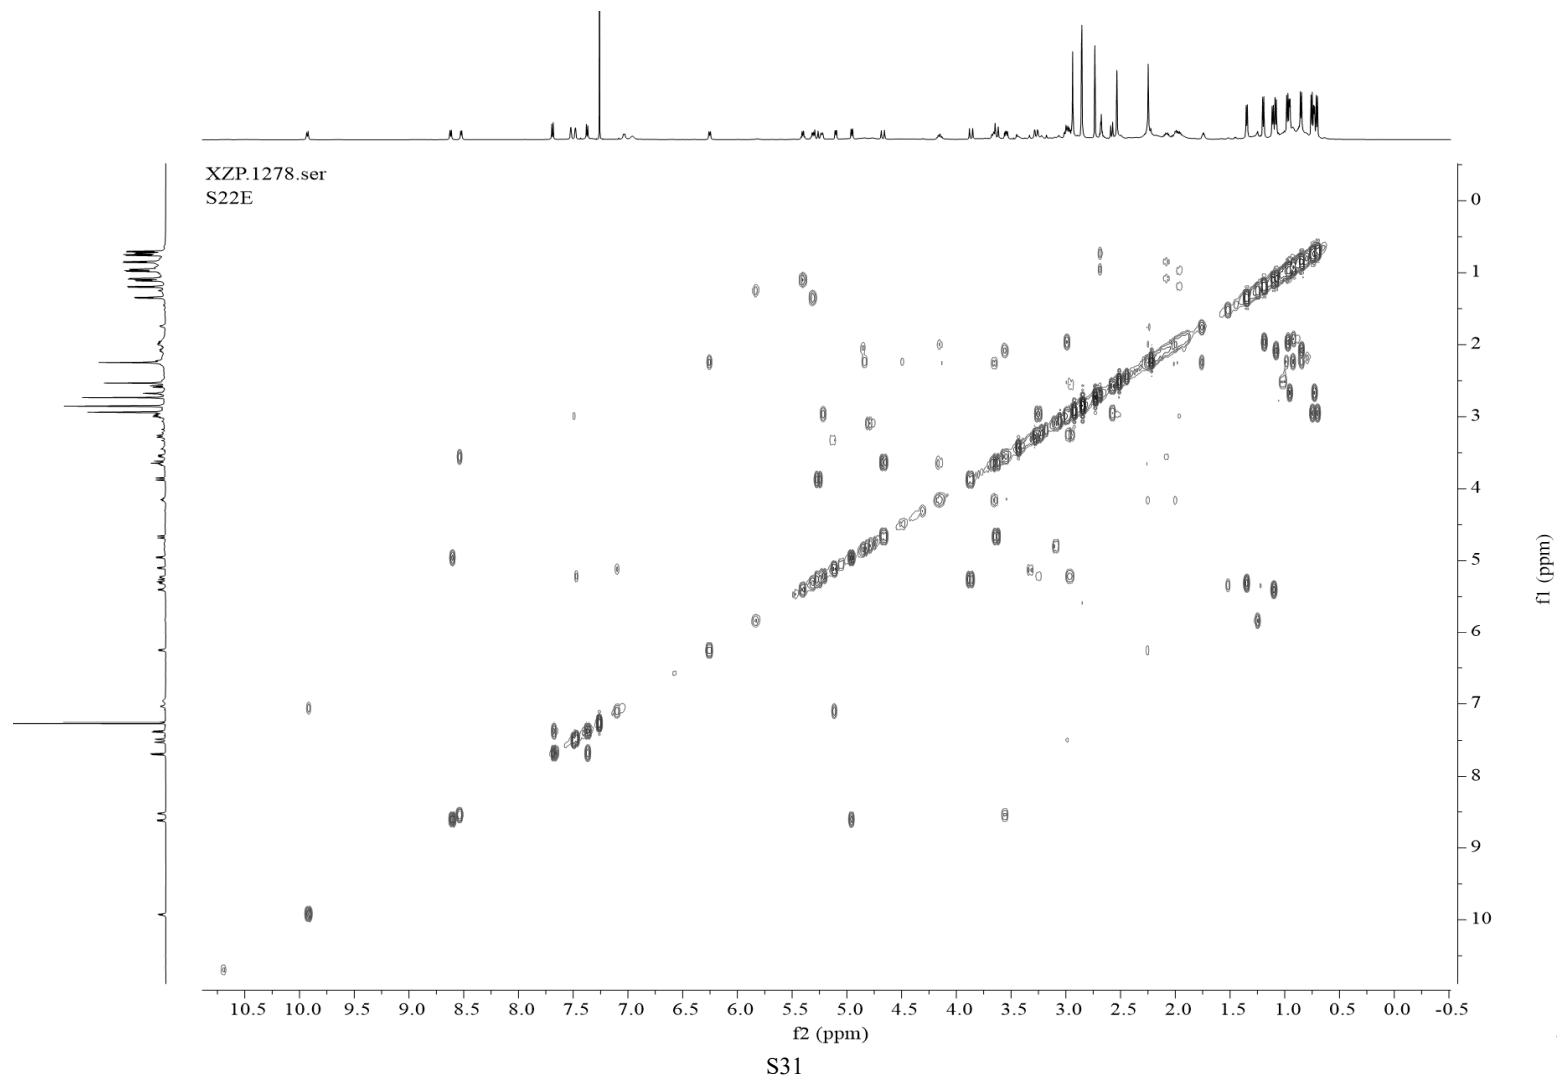

**Fig. S14** HSQC spectrum (600 MHz) of compound **1** in CDCl<sub>3</sub>.

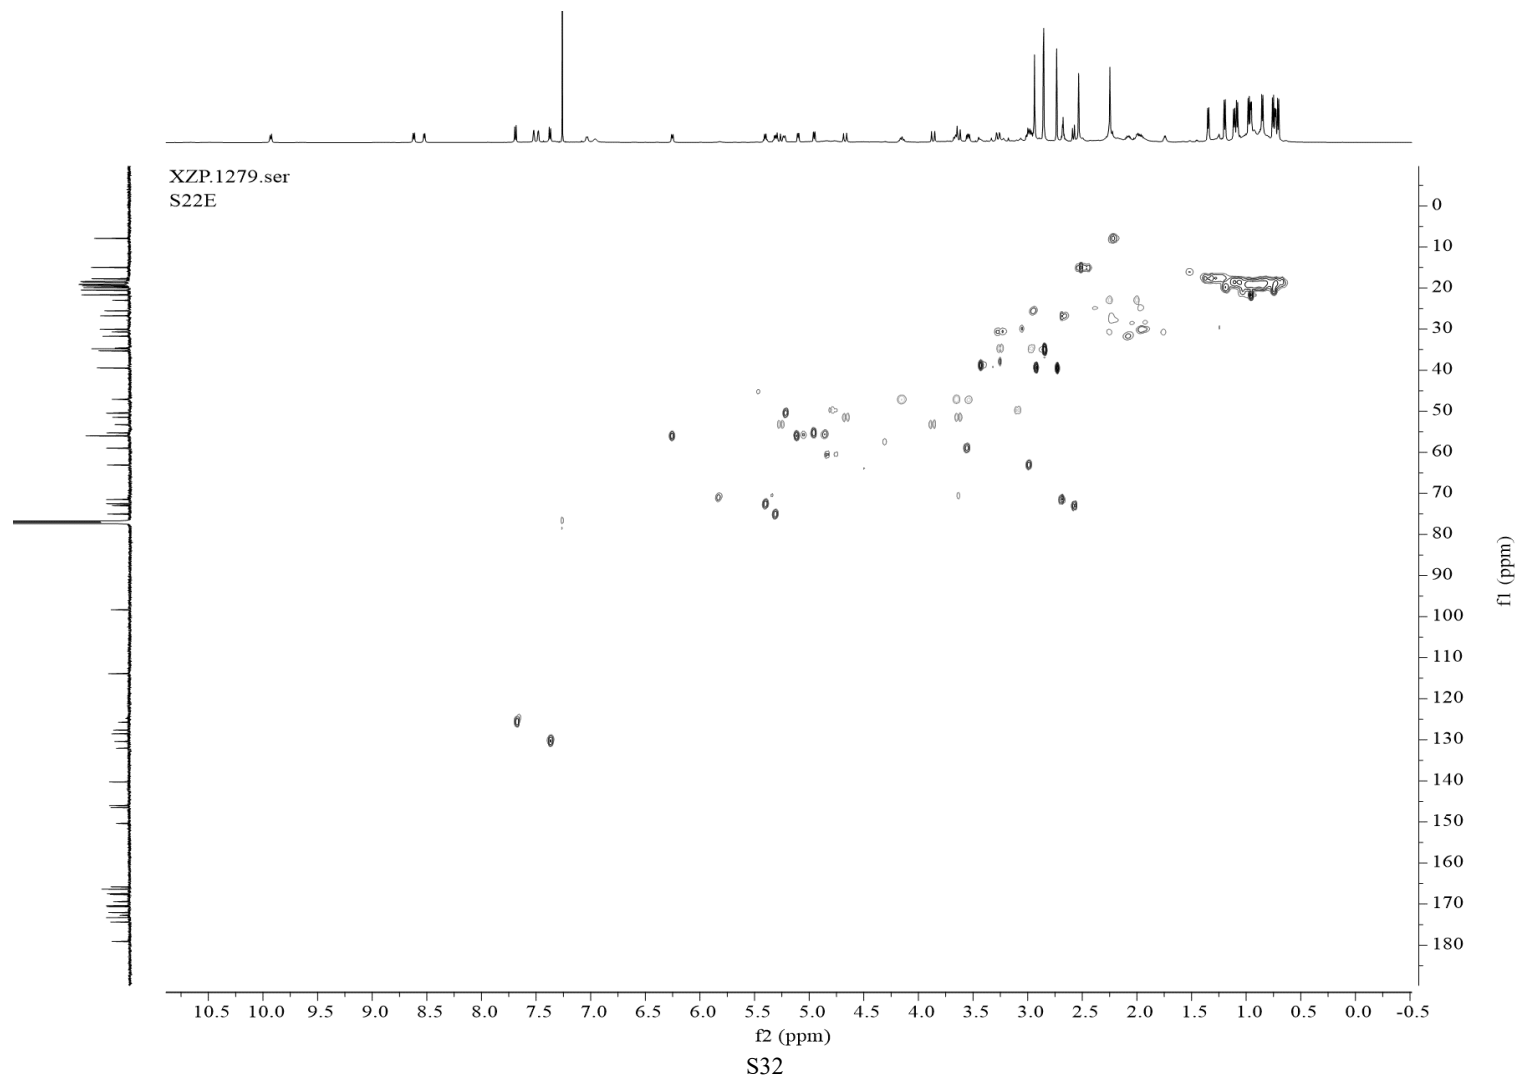



Fig. S15 HMBC spectrum (600 MHz) of compound **1** in CDCl<sub>3</sub>.

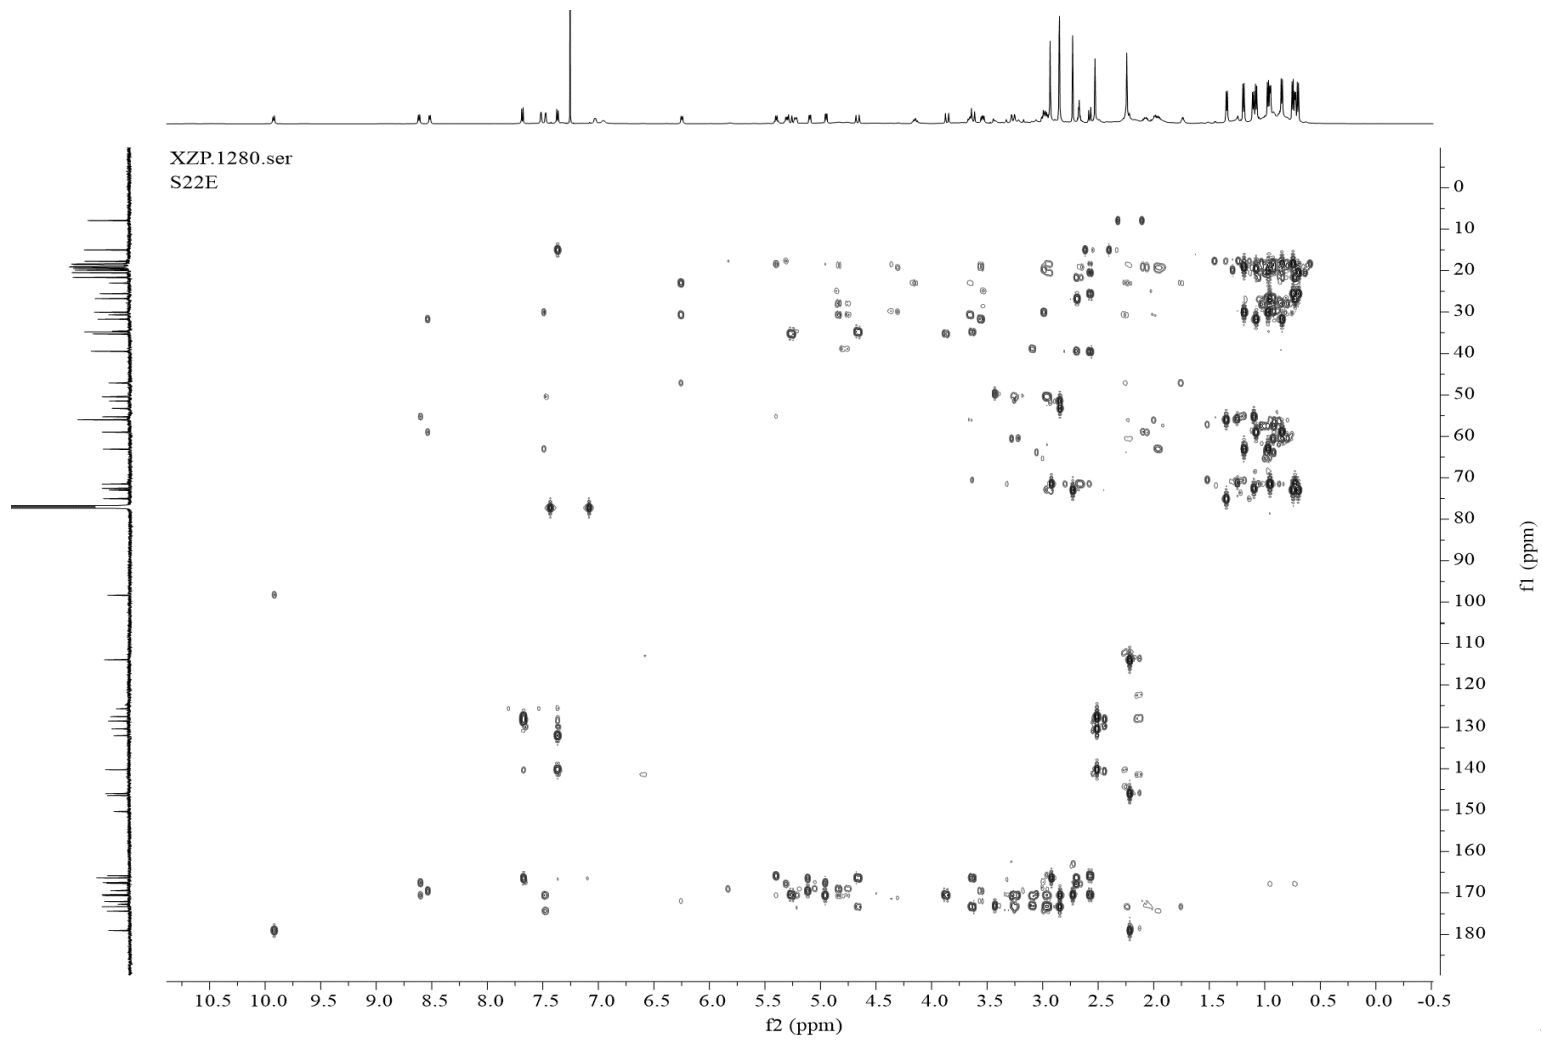

Fig. S16 NOESY spectrum (600 MHz) of compound **1** in CDCl<sub>3</sub>.

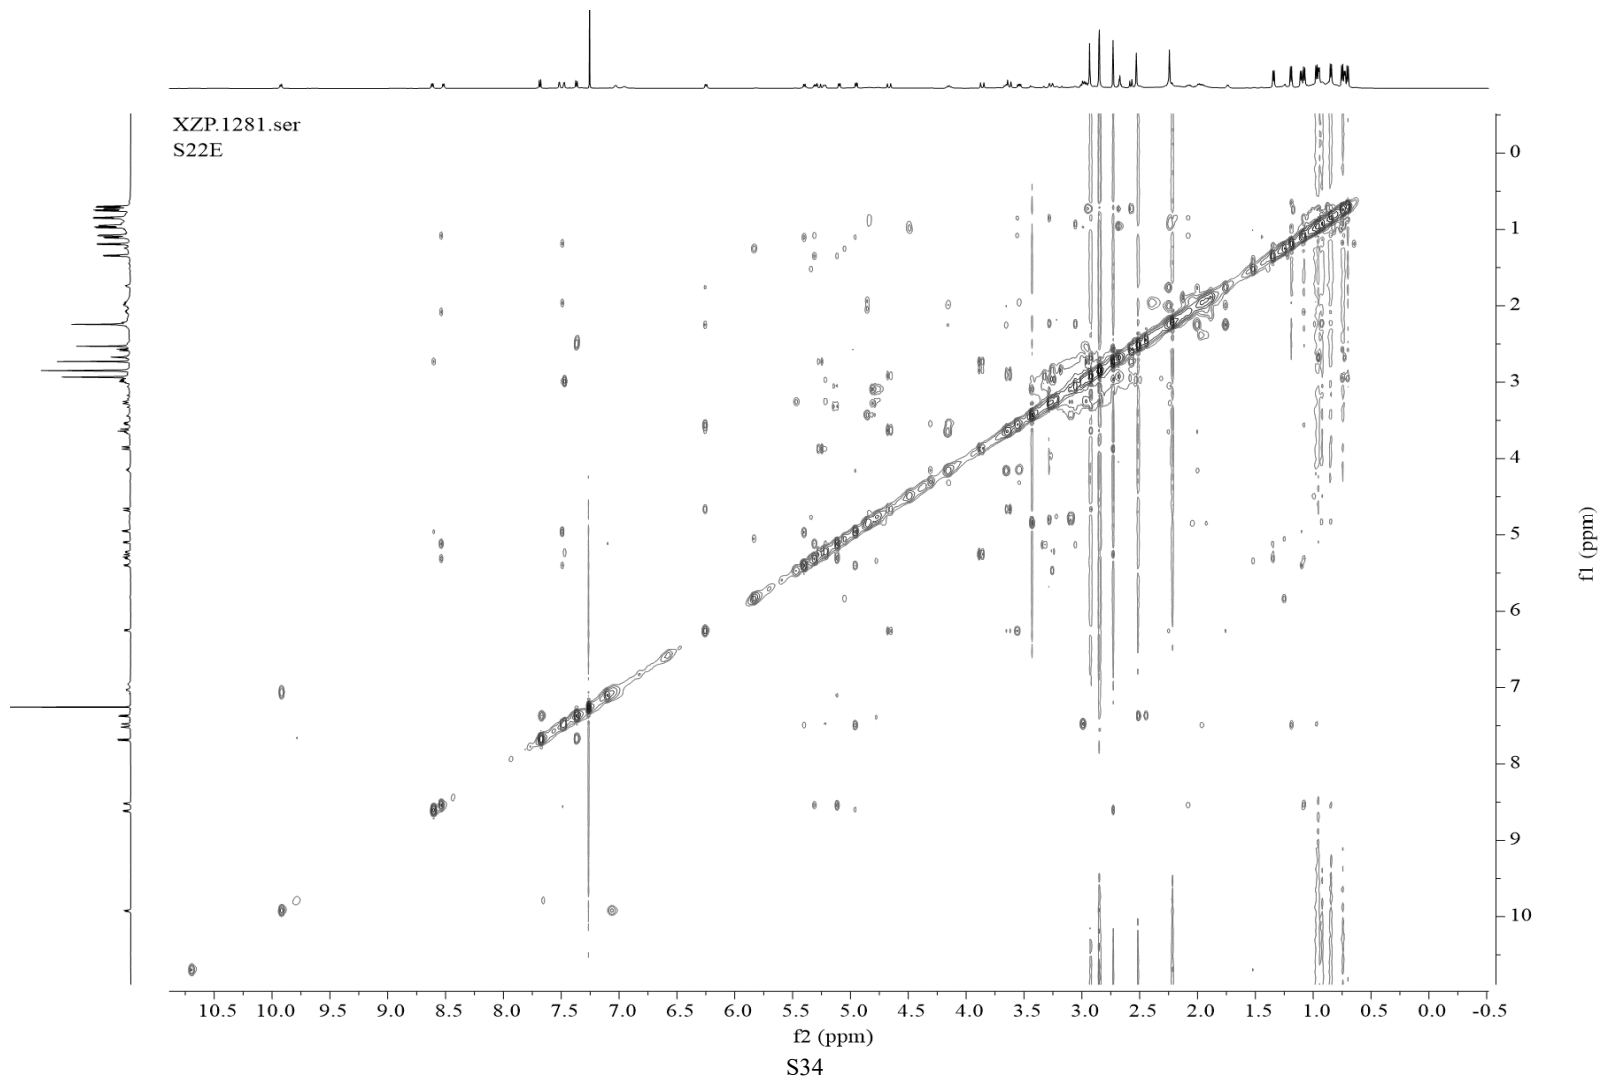

**Fig. S17** HRESIMS spectrum of compound **1**.

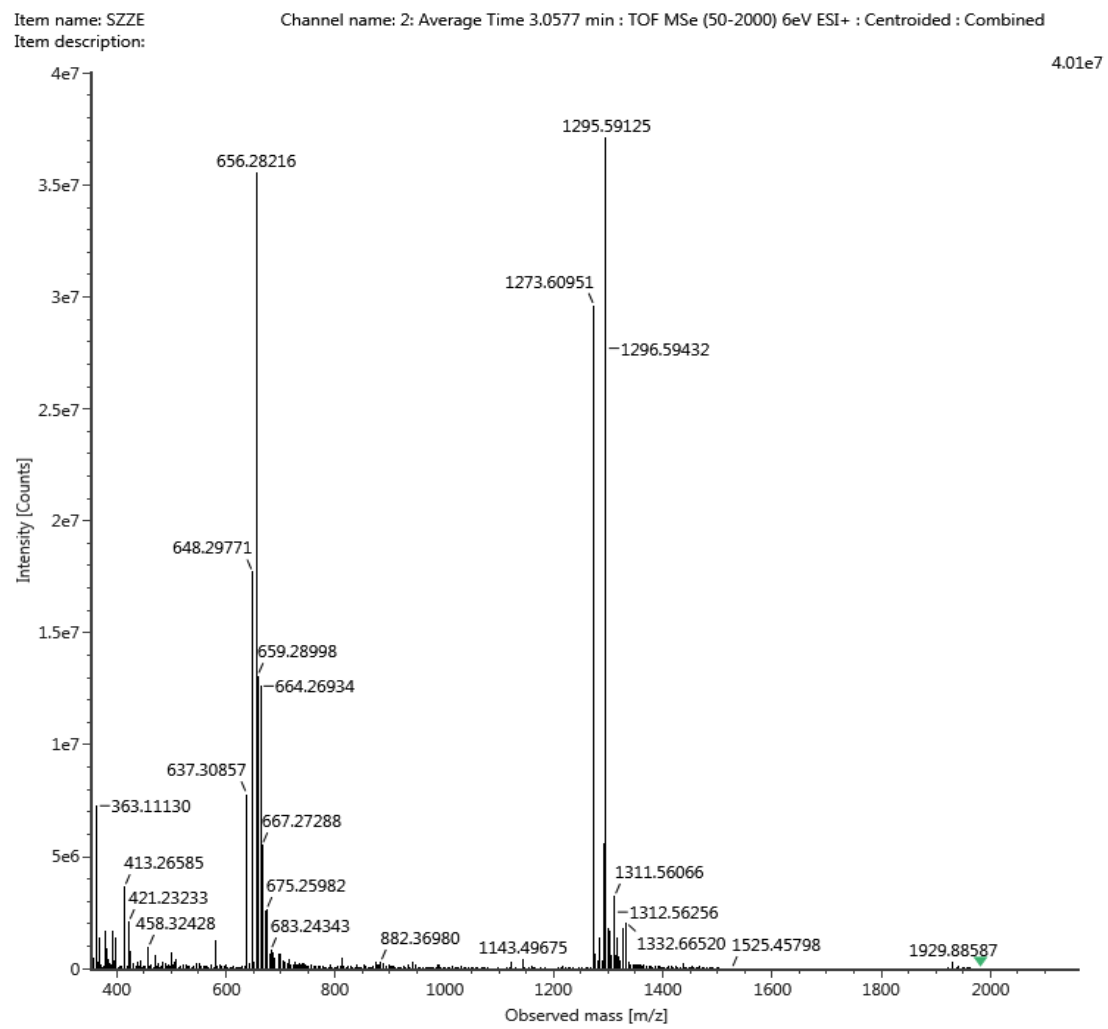



Fig. S19  $^{13}\text{C}\{^1\text{H}\}$  NMR spectrum (150 MHz) of compound **2** in  $\text{CDCl}_3$ .

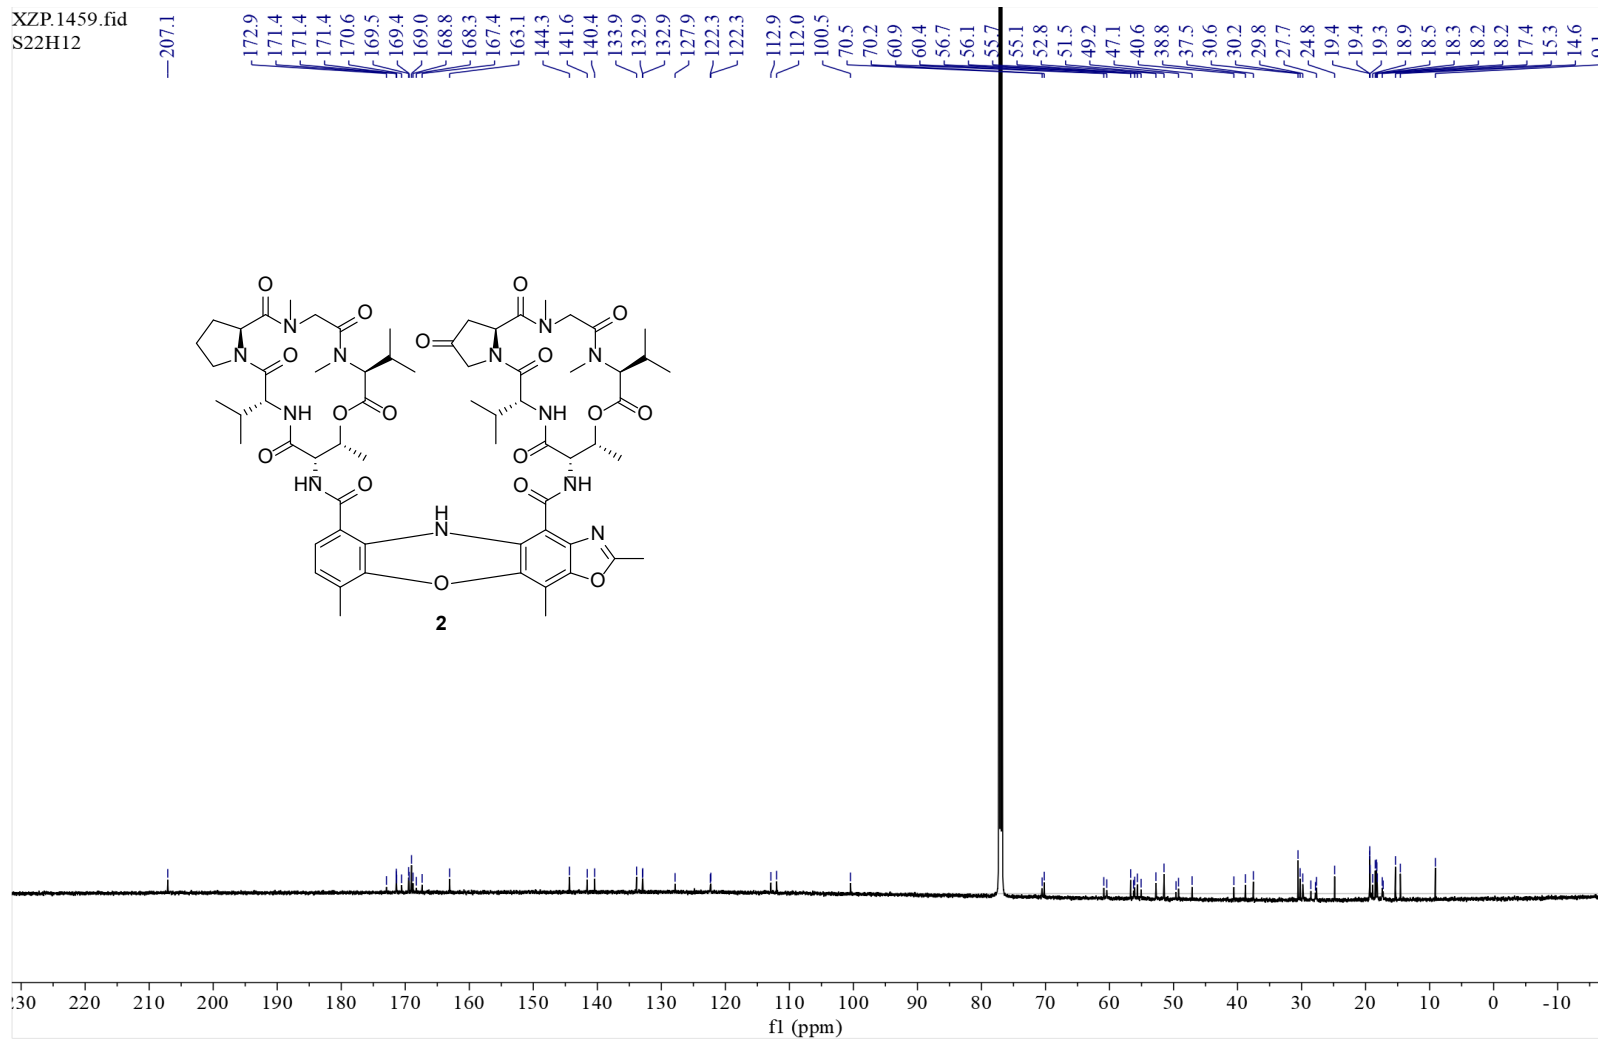

Fig. S20 DEPT-135 spectrum (150 MHz) of compound 2 in CDCl<sub>3</sub>.

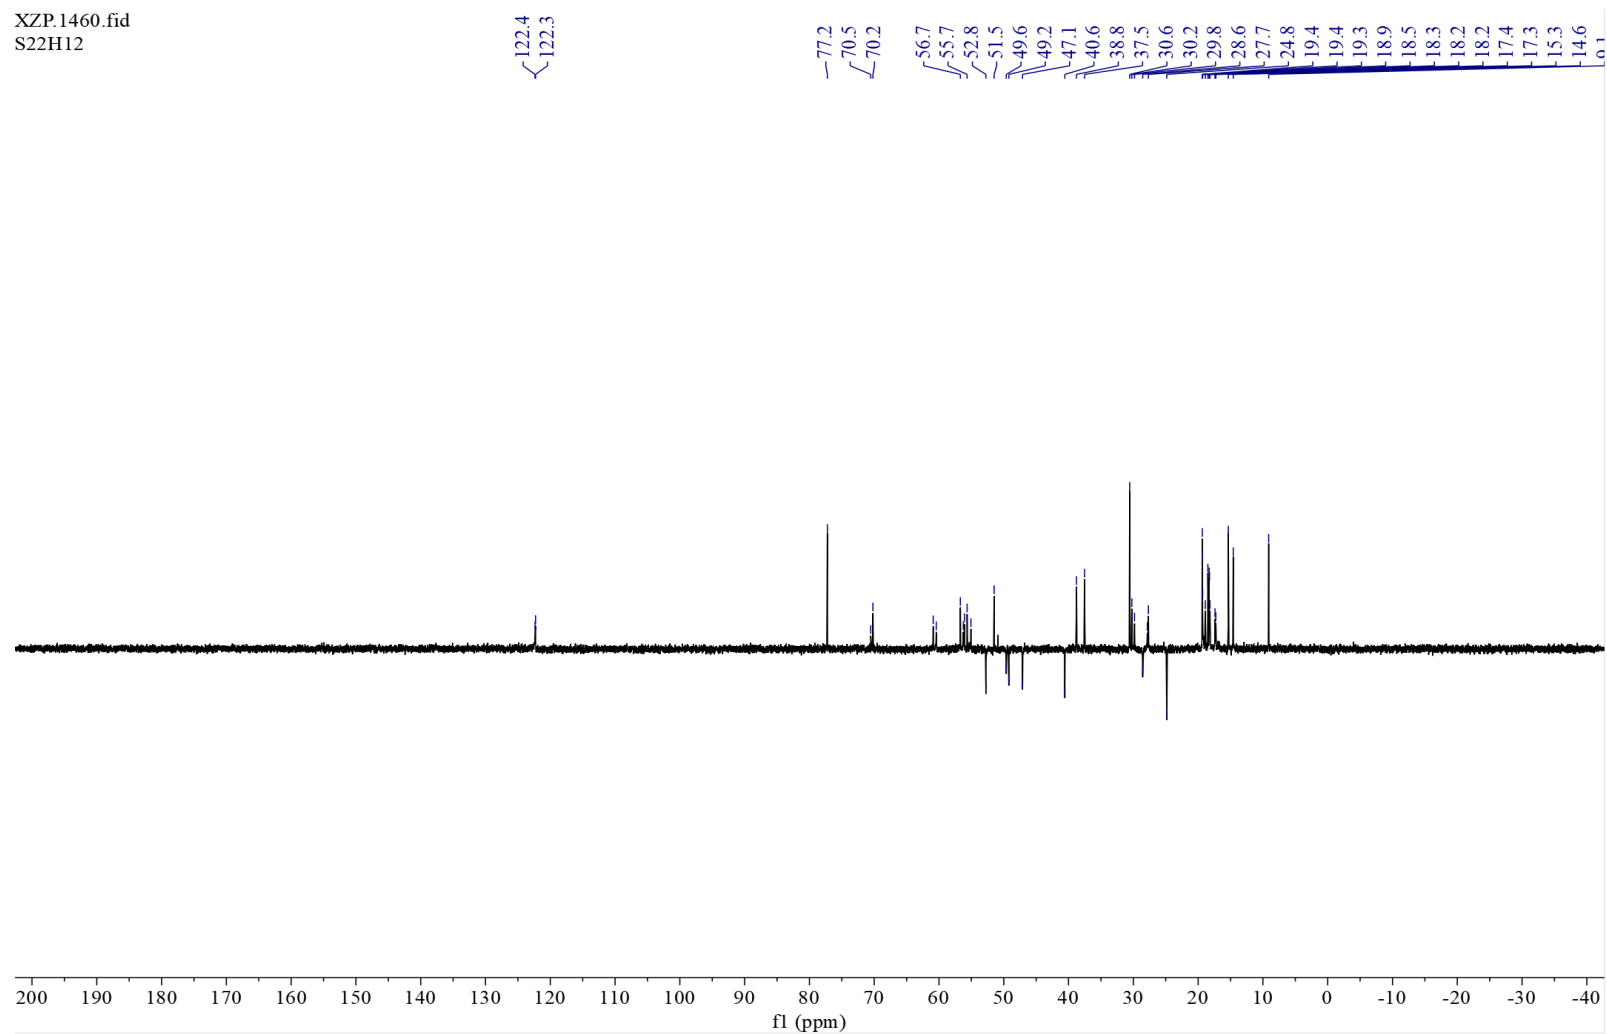

Fig. S21 COSY spectrum (600 MHz) of compound 2 in CDCl<sub>3</sub>.

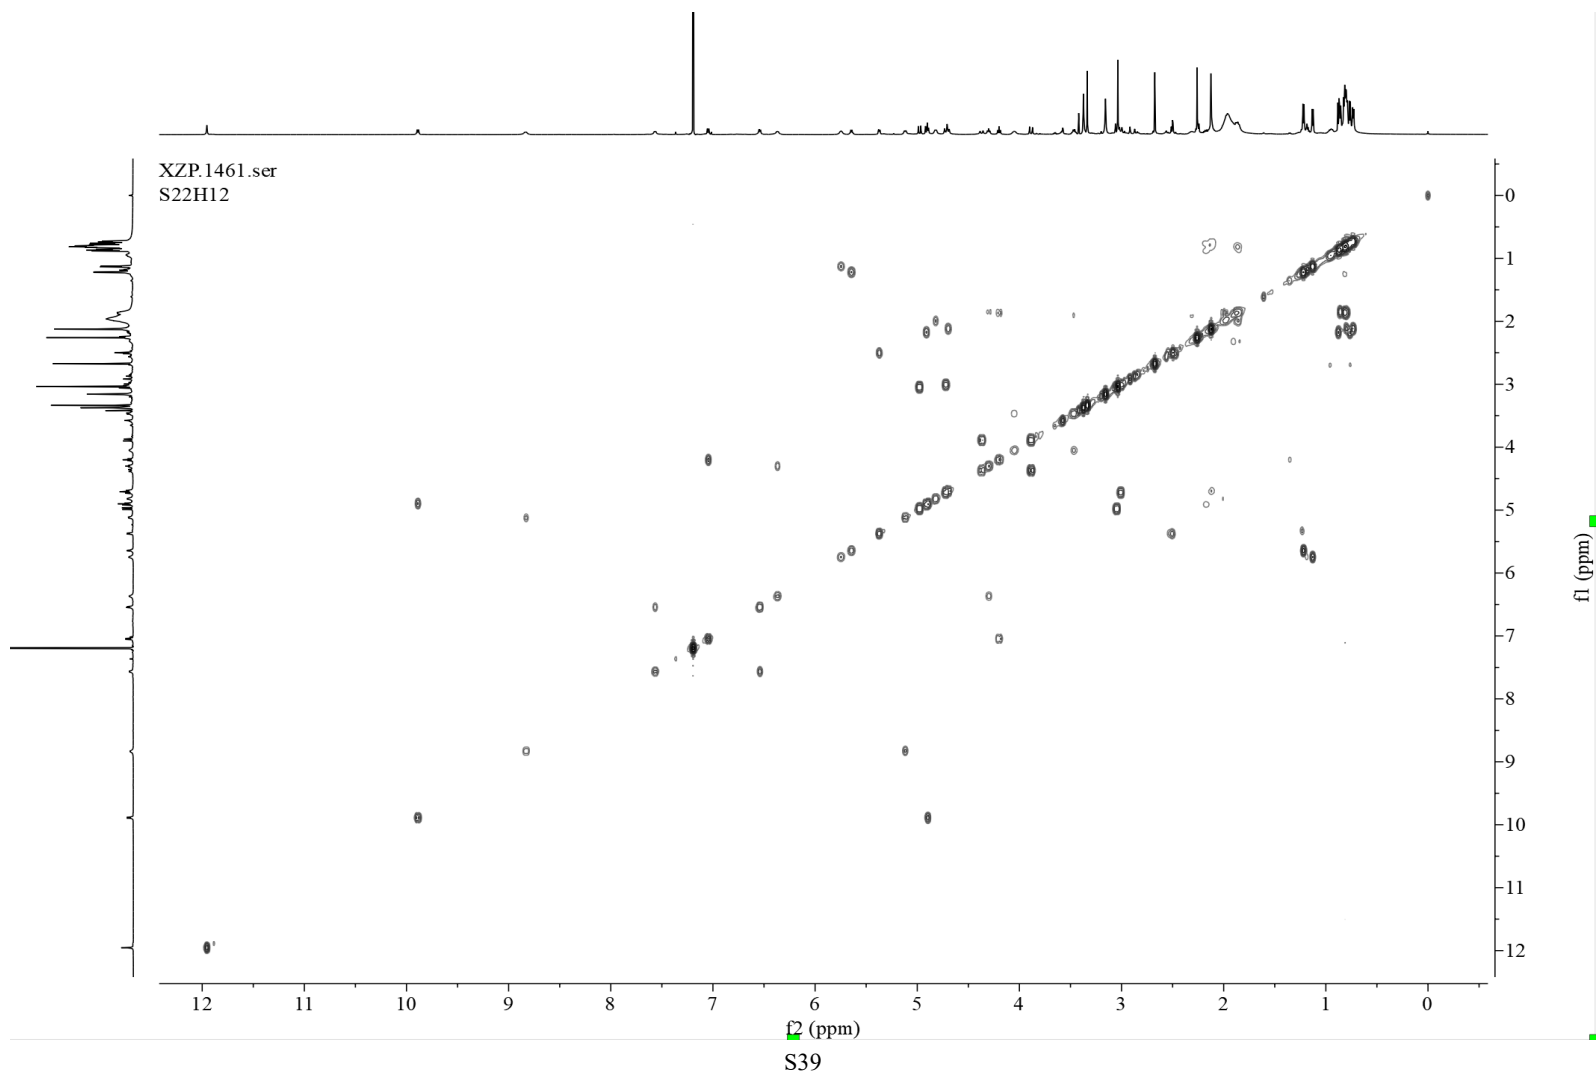

Fig. S22 HSQC spectrum (600 MHz) of compound 2 in CDCl<sub>3</sub>.

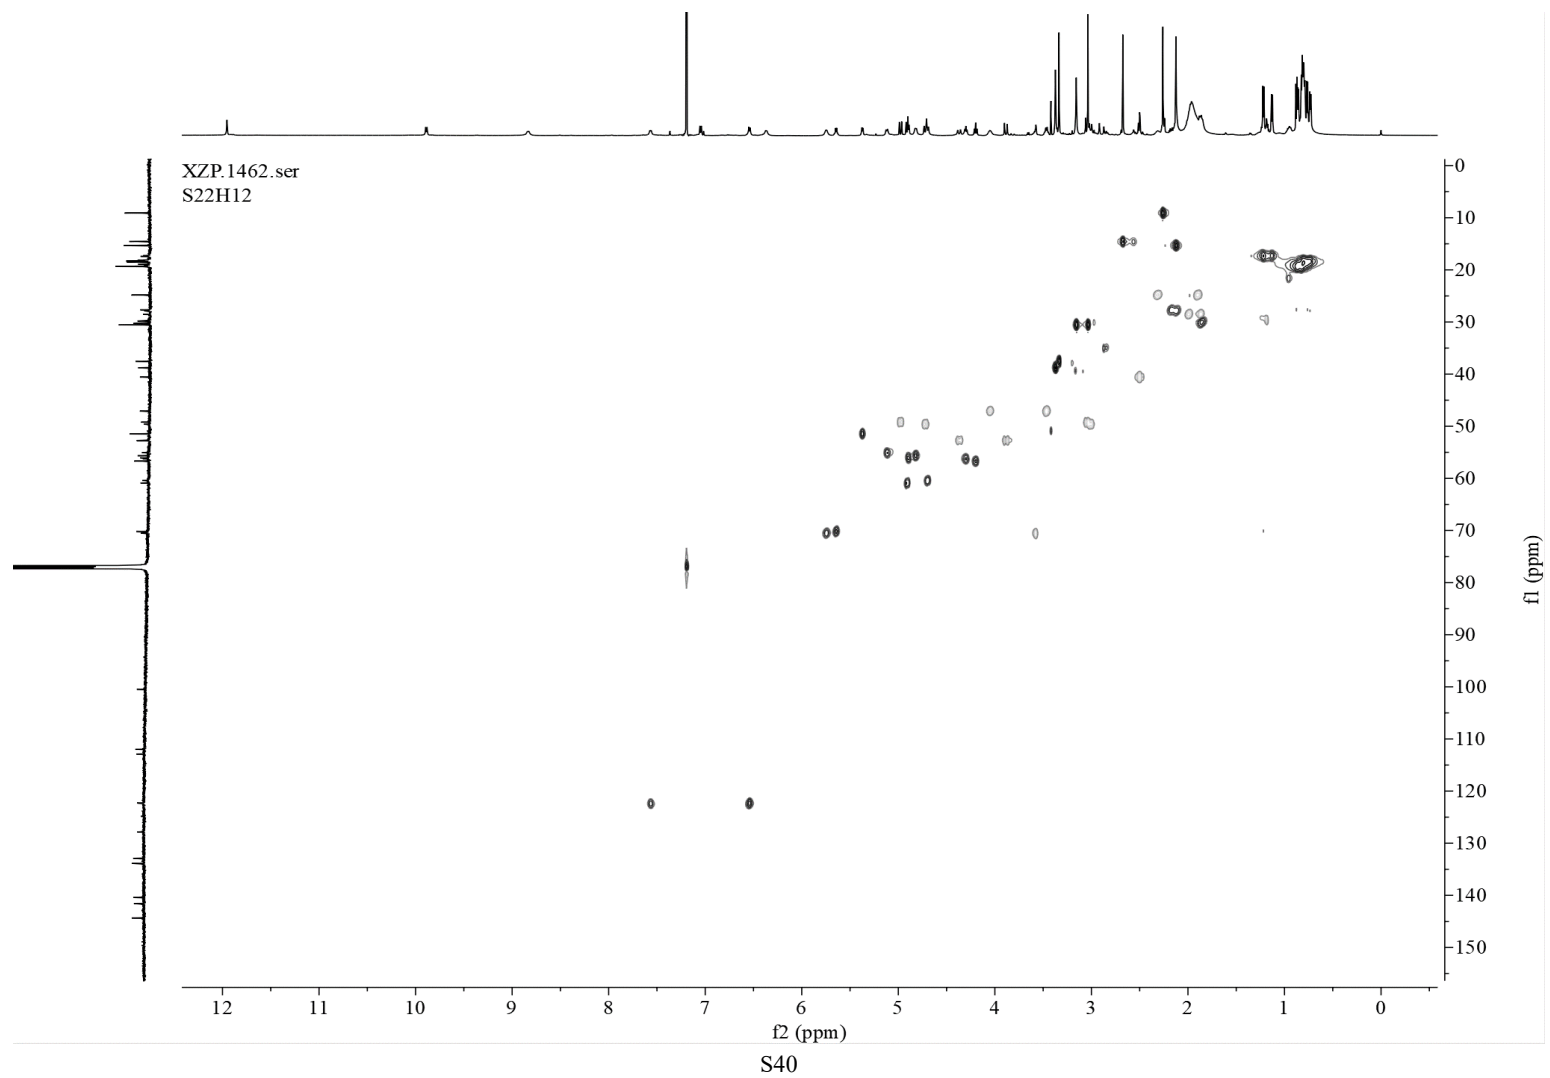



Fig. S23 HMBC spectrum (600 MHz) of compound **2** in CDCl<sub>3</sub>.

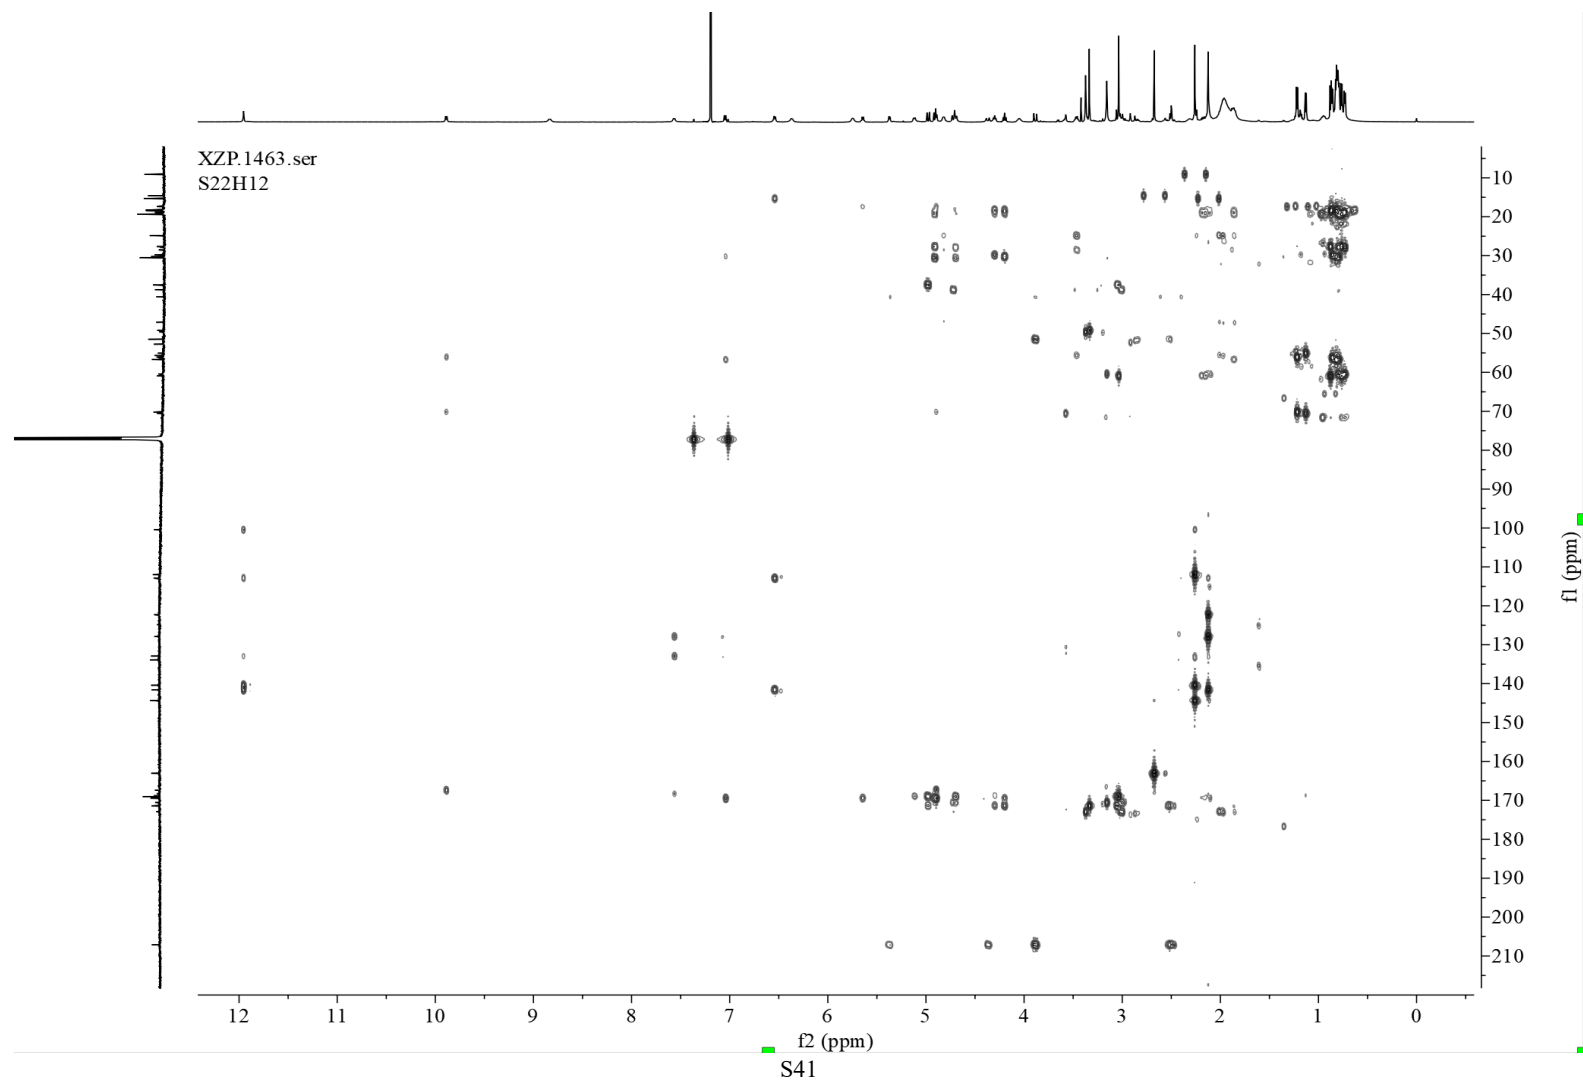

Fig. S24 NOESY spectrum (600 MHz) of compound 2 in CDCl<sub>3</sub>.

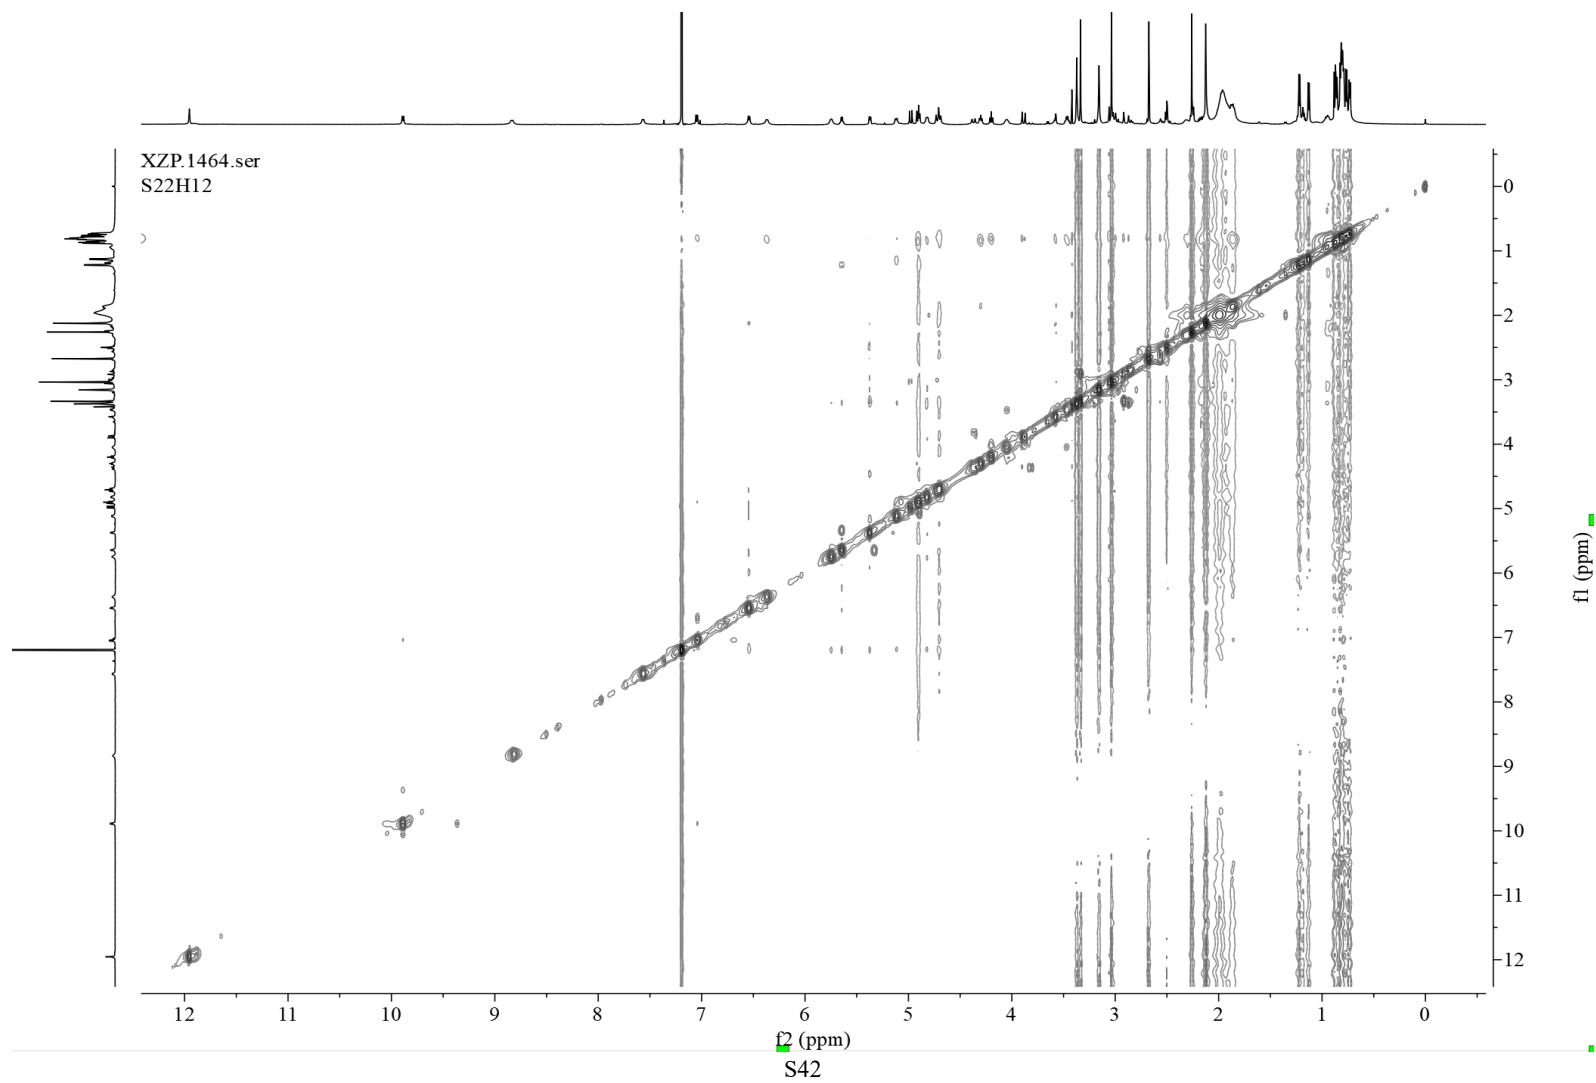

**Fig. S25** HRESIMS spectrum of compound **2**.

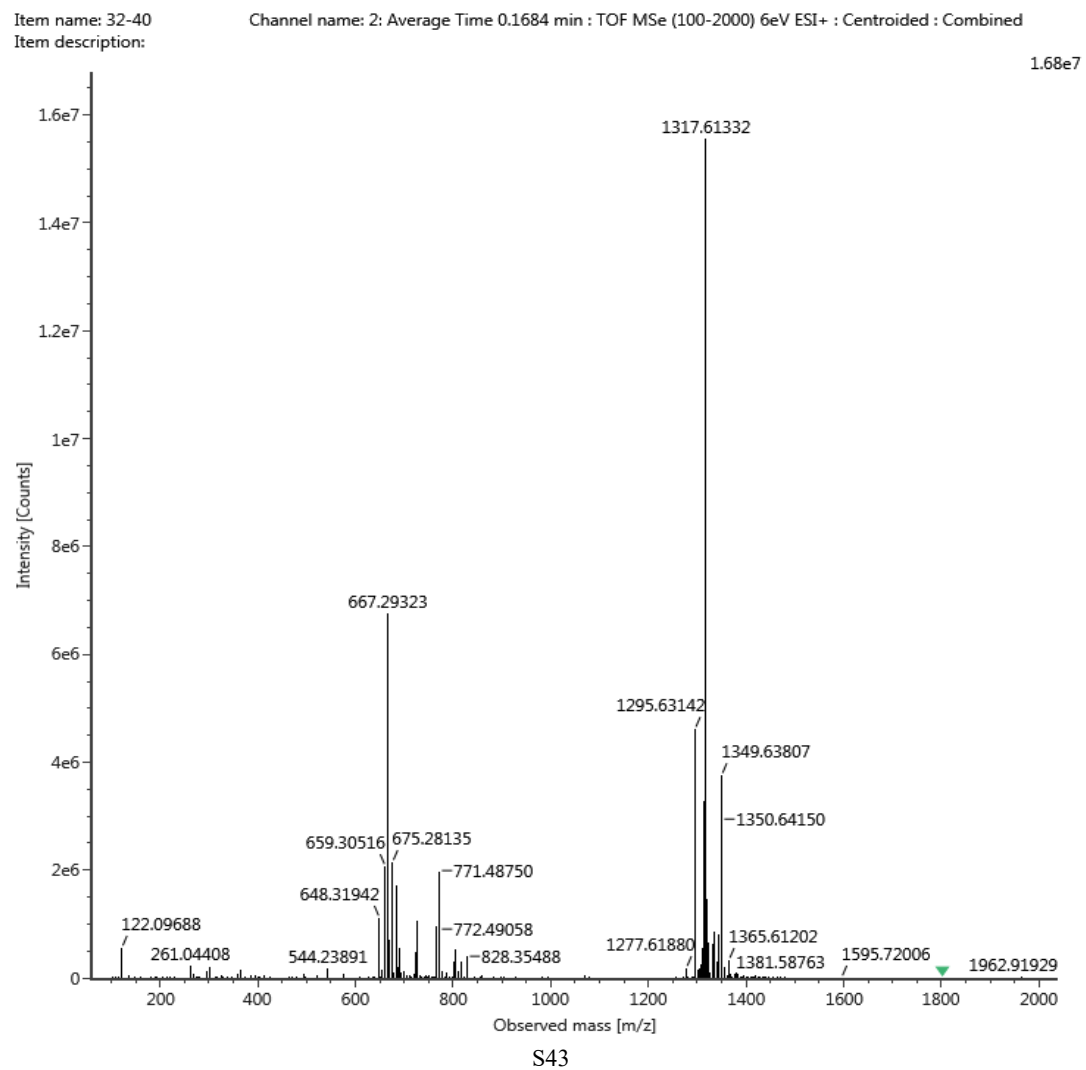

Fig. S26 <sup>1</sup>H NMR spectrum (600 MHz) of compound **3** in CDCl<sub>3</sub>.

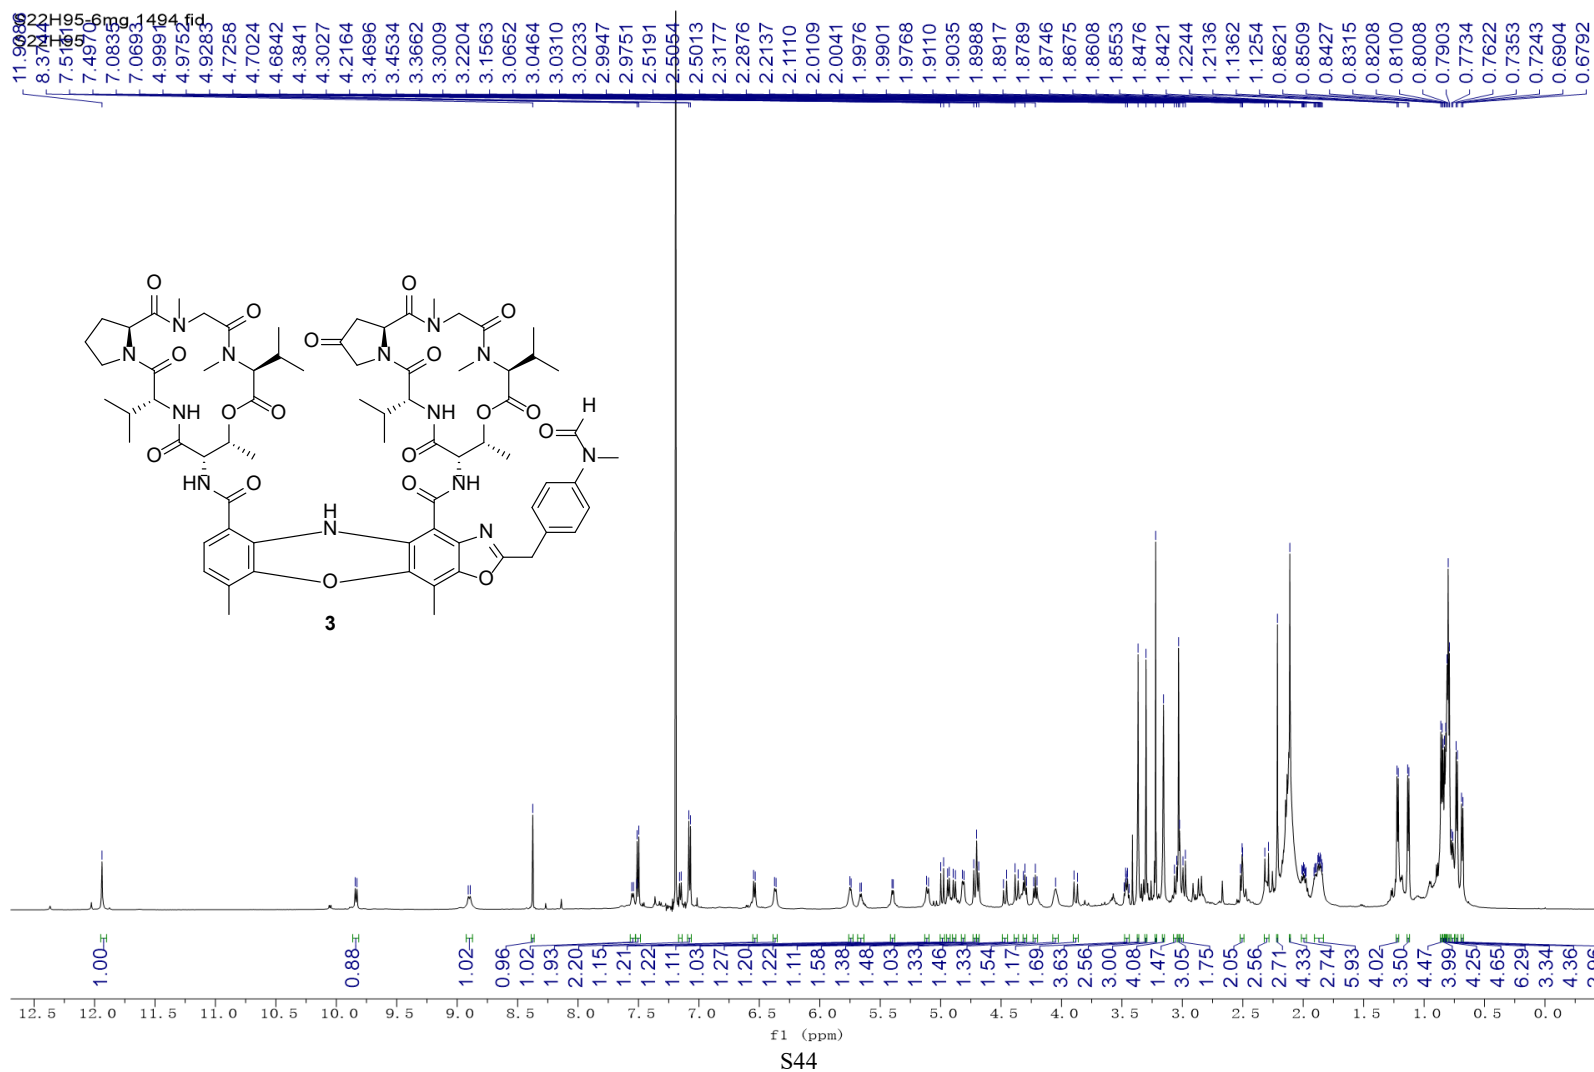

Fig. S27  $^{13}\text{C}\{^1\text{H}\}$  NMR spectrum (150 MHz) of compound **3** in  $\text{CDCl}_3$ .

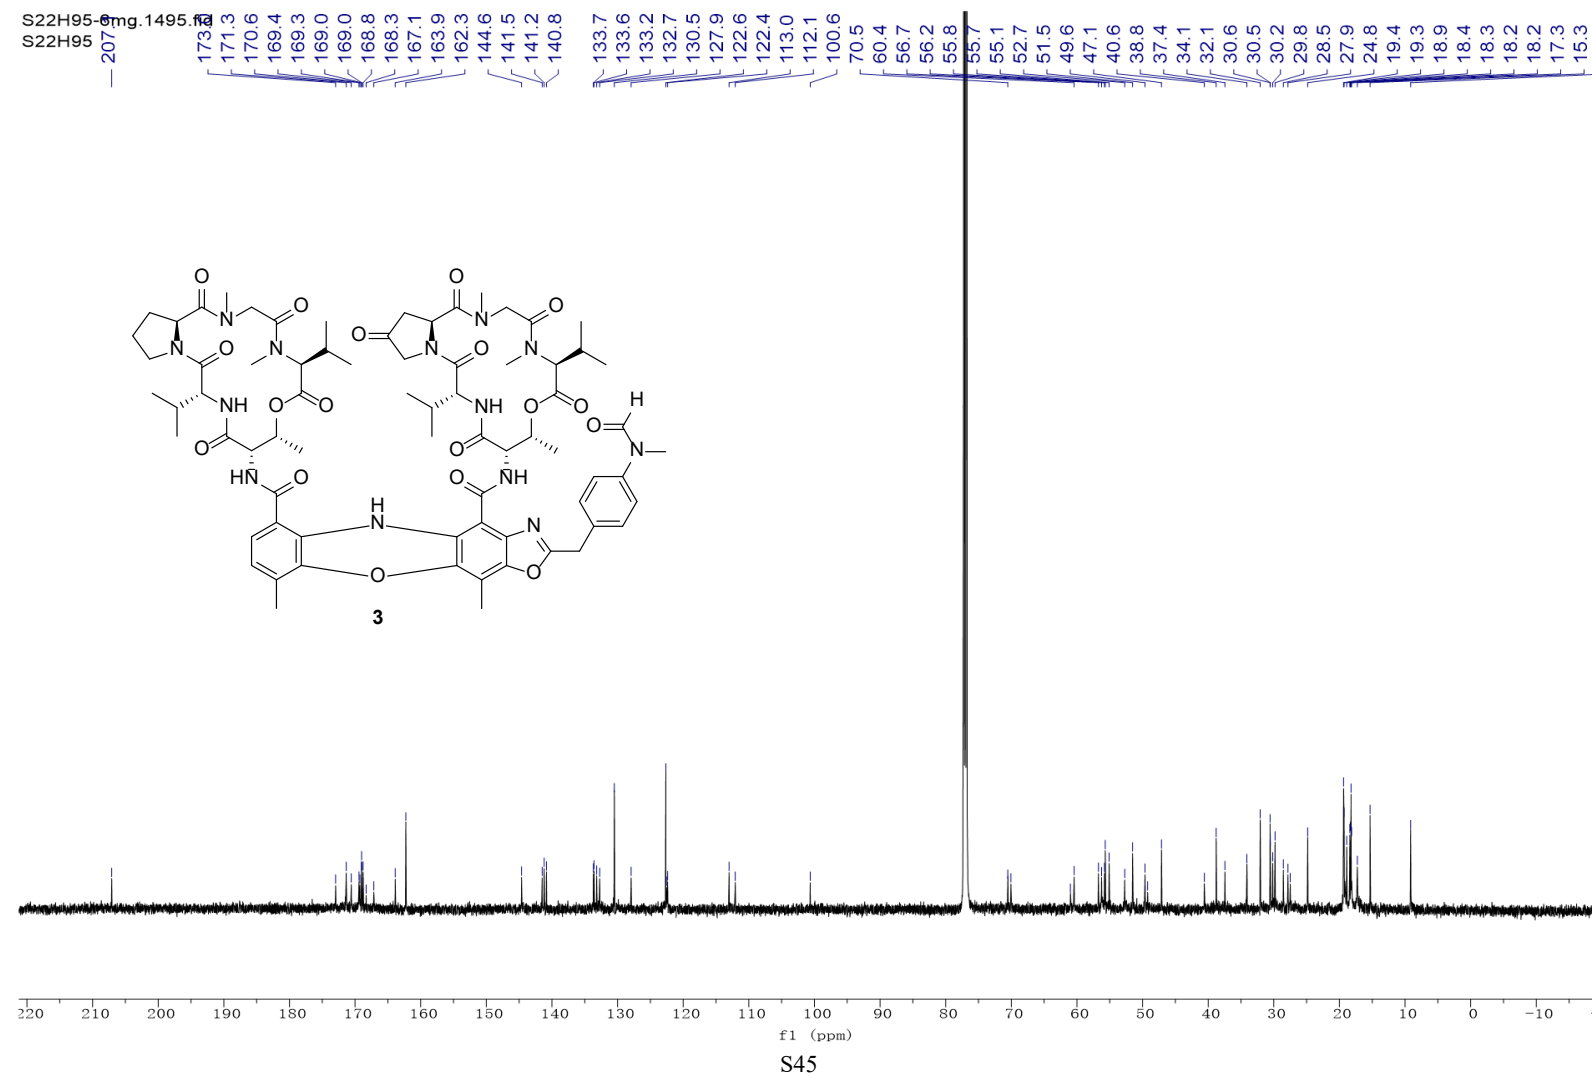

Fig. S28 DEPT-135 spectrum (150 MHz) of compound **3** in CDCl<sub>3</sub>.

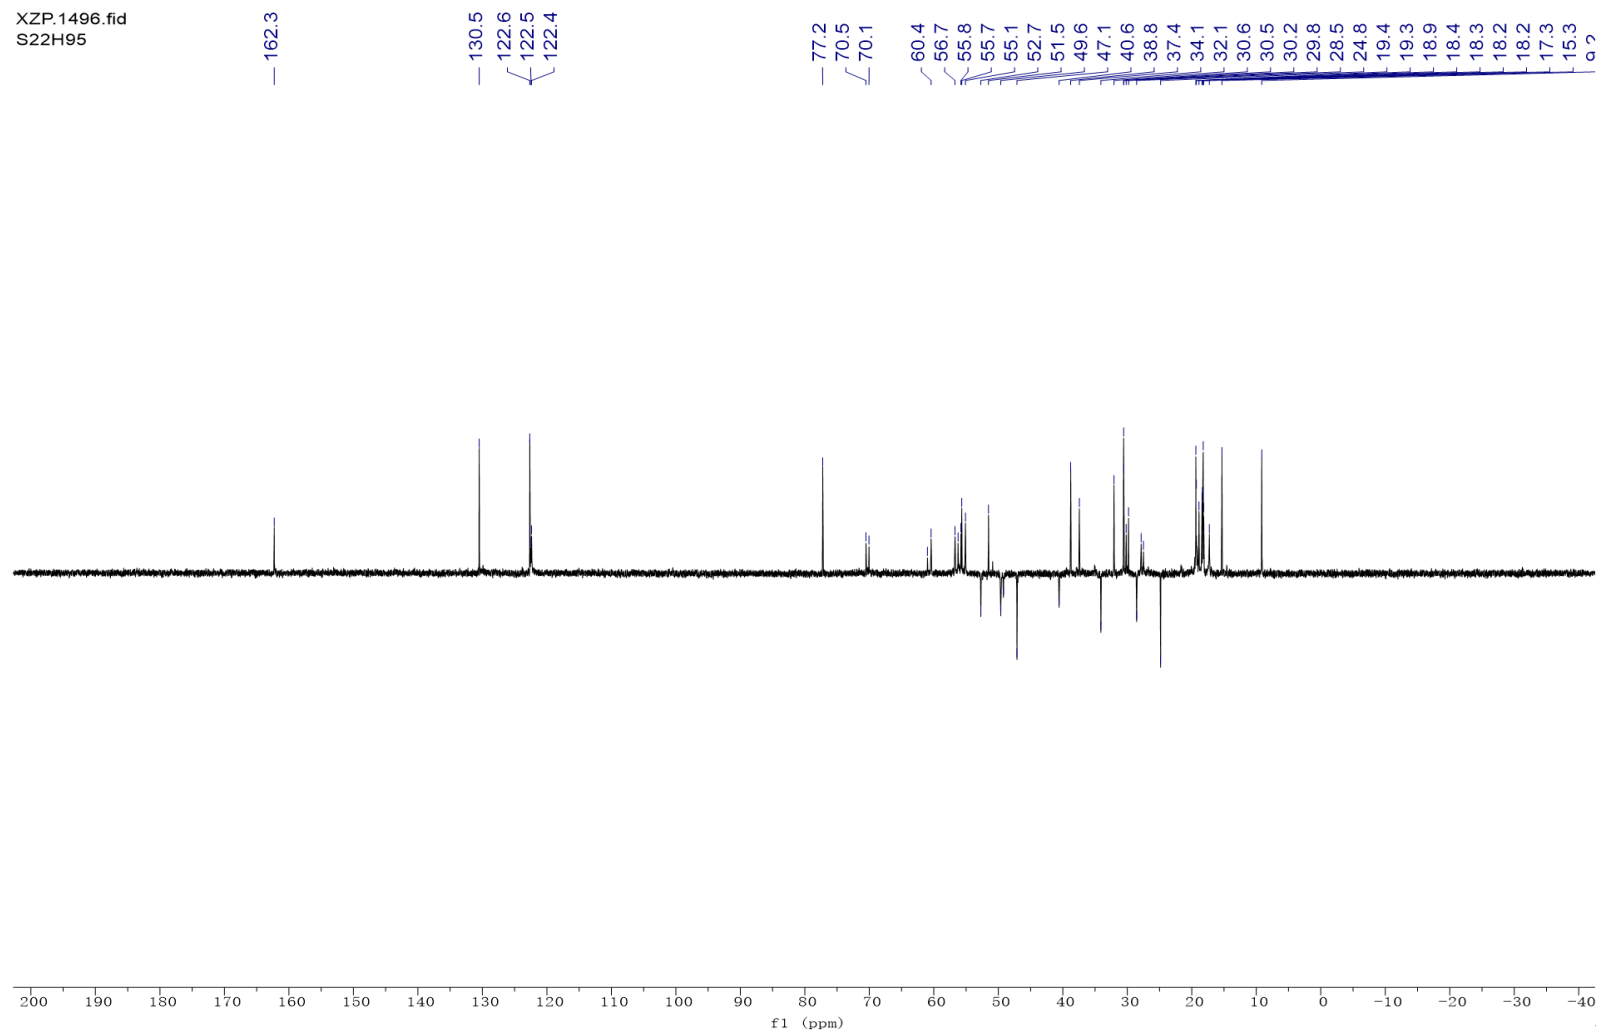

**Fig. S29** COSY spectrum (600 MHz) of compound **3** in CDCl<sub>3</sub>.

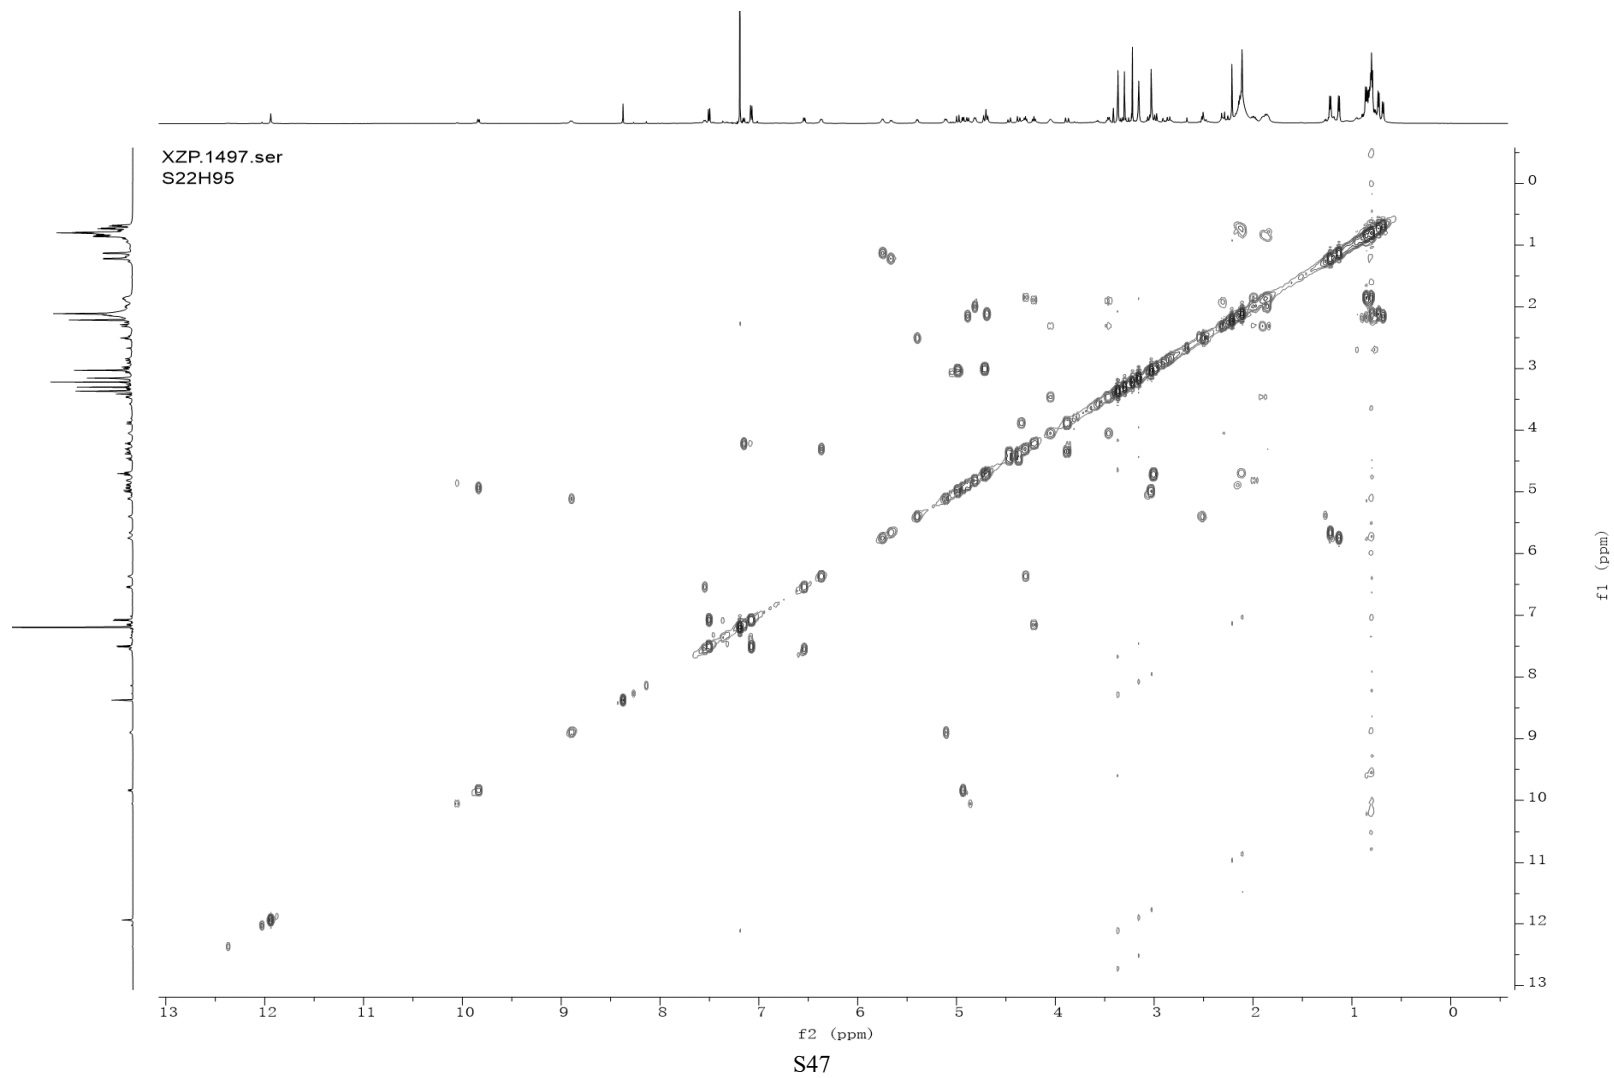

Fig. S30 HSQC spectrum (600 MHz) of compound **3** in CDCl<sub>3</sub>.

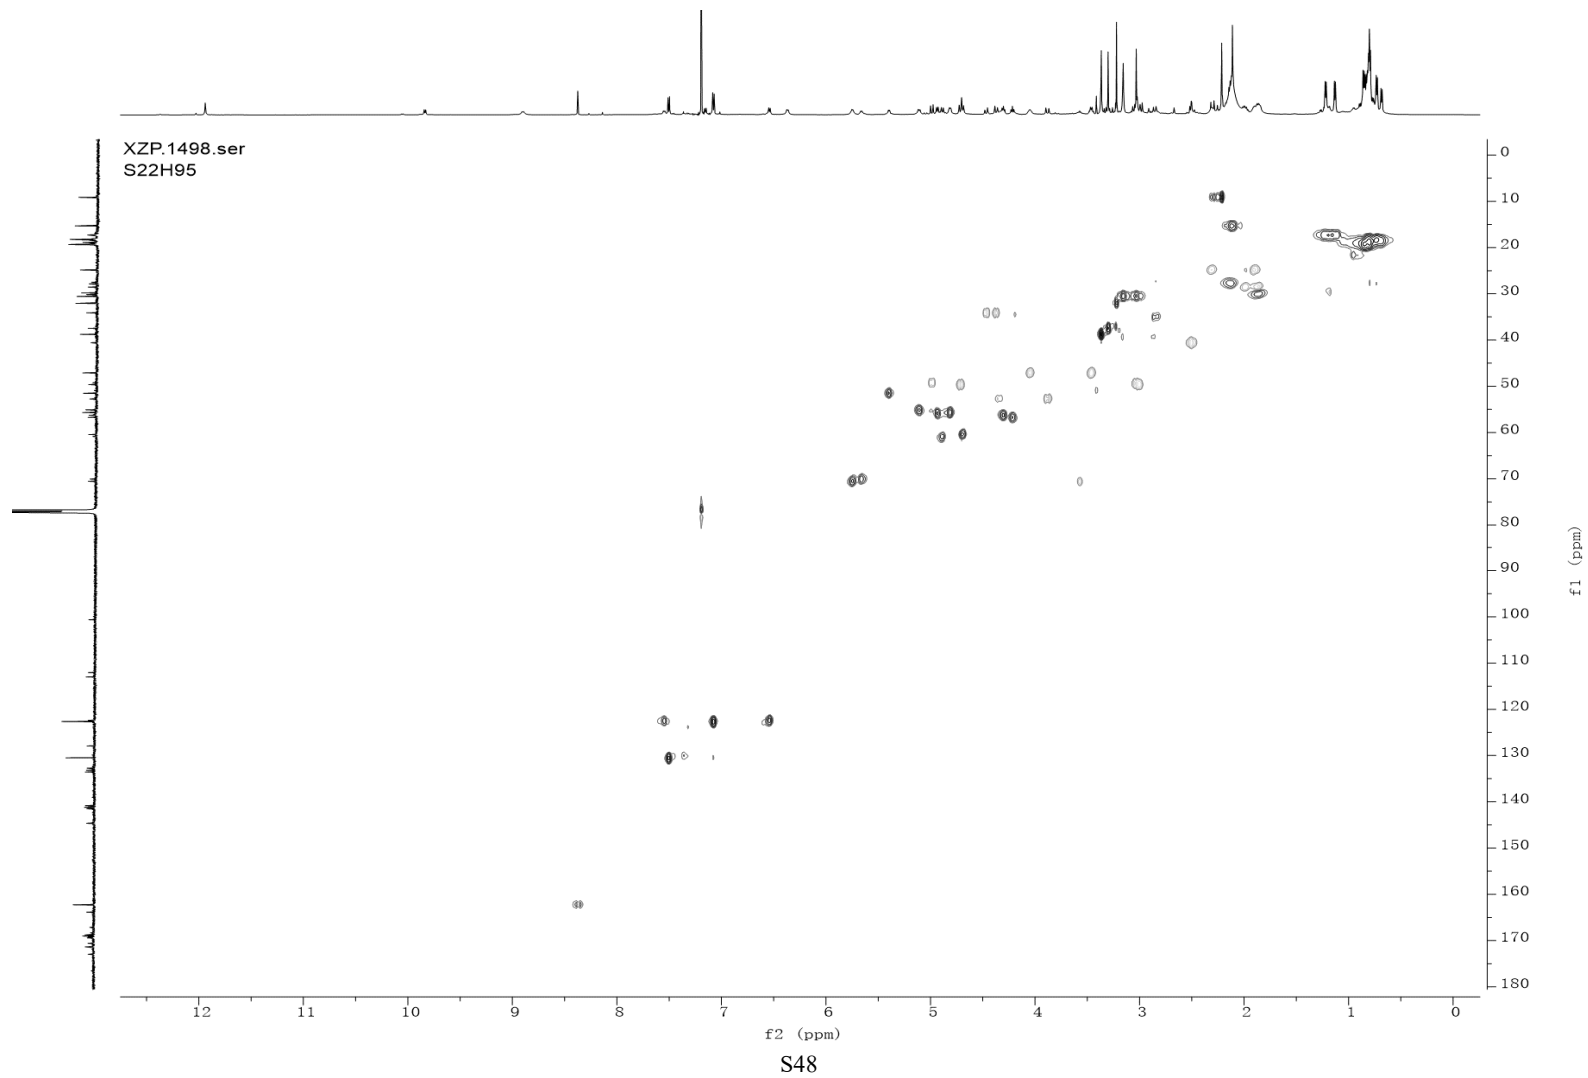



Fig. S31 HMBC spectrum (600 MHz) of compound 3 in CDCl<sub>3</sub>.

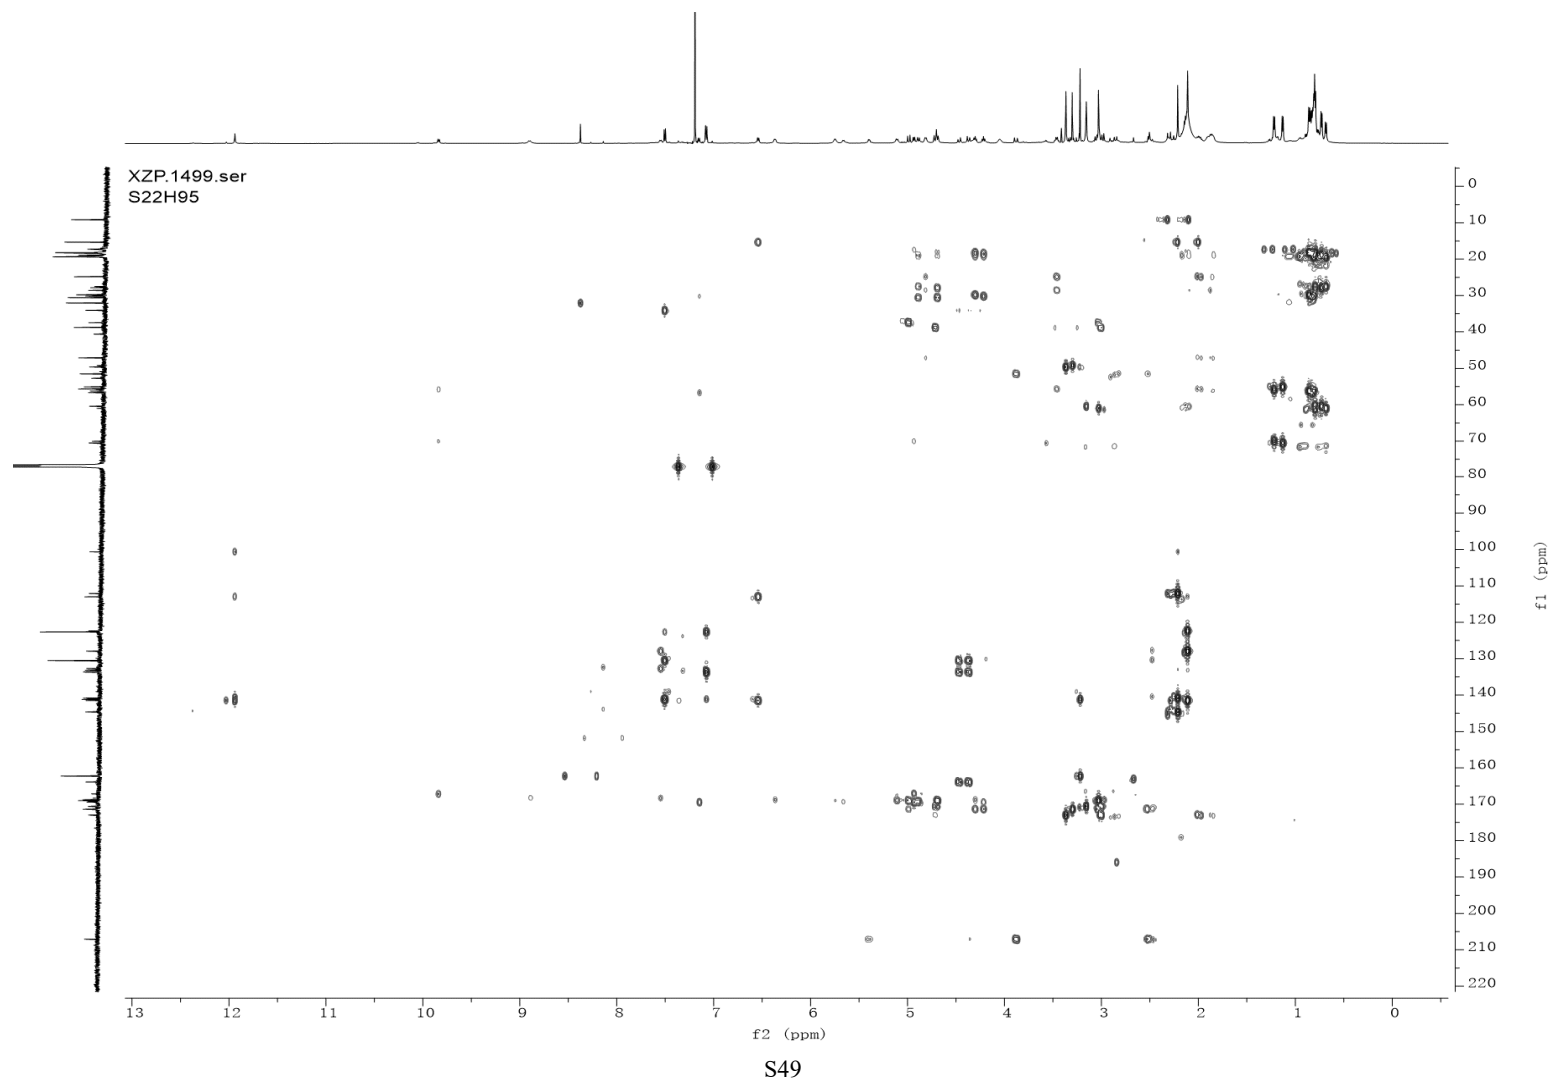

Fig. S32 NOESY spectrum (600 MHz) of compound **3** in CDCl<sub>3</sub>.

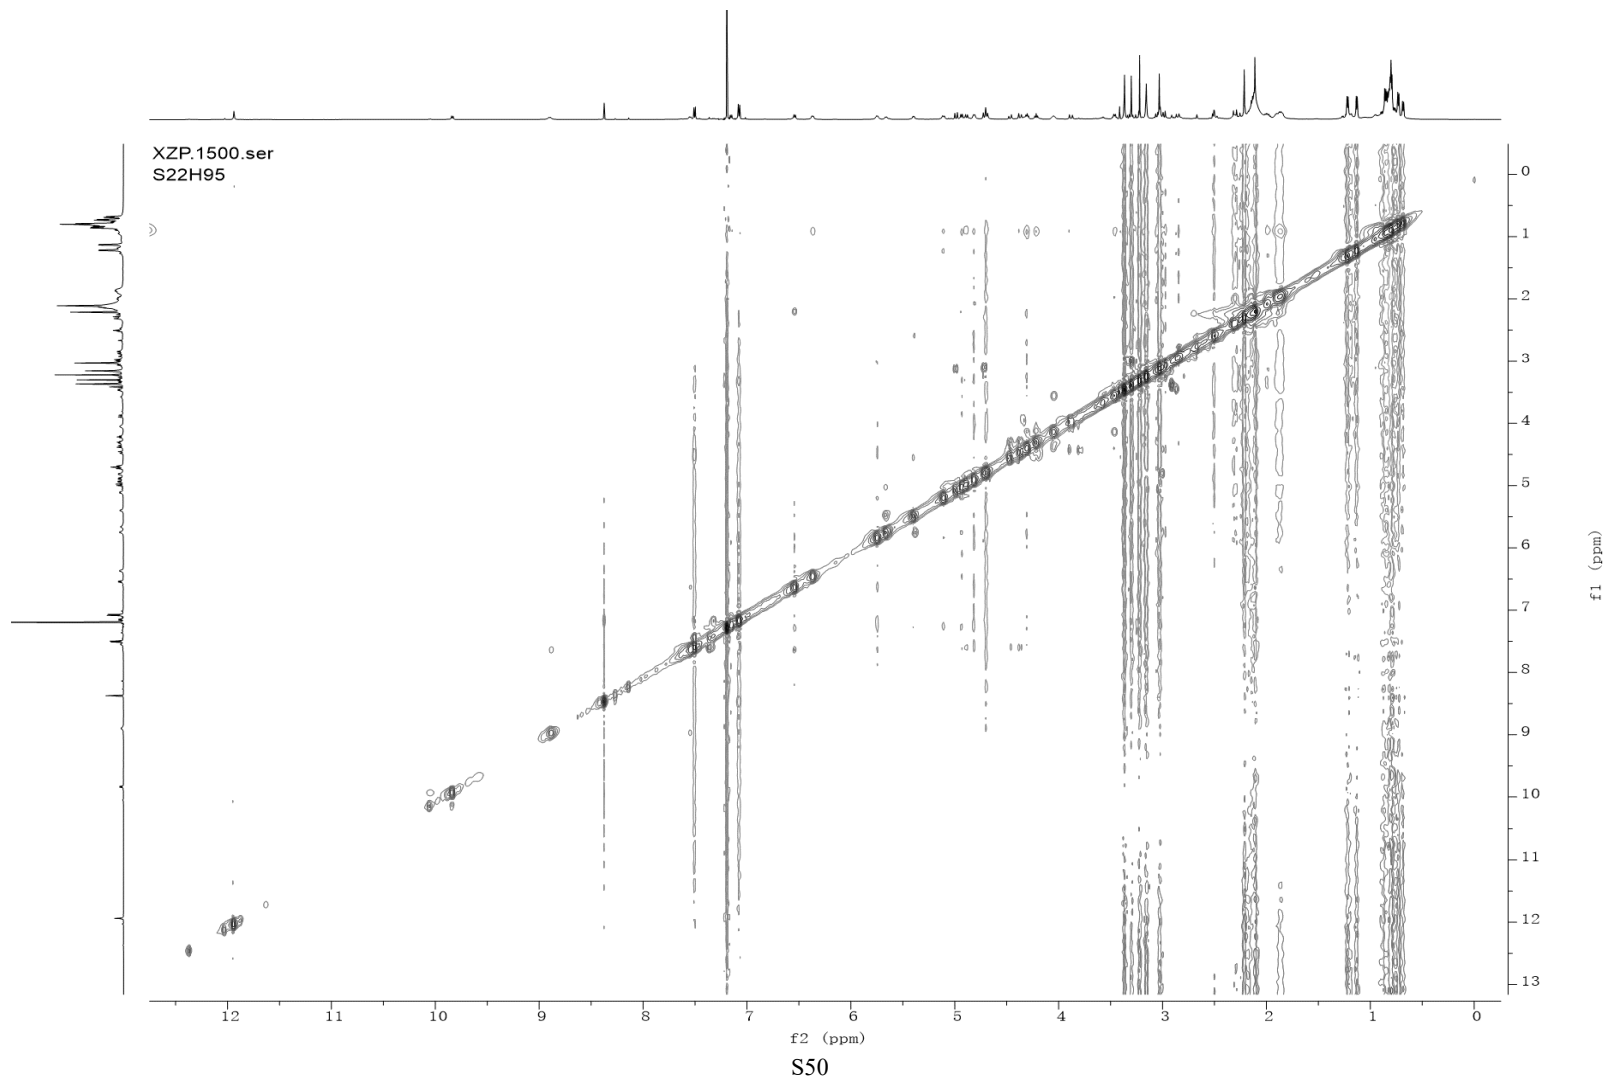

**Fig. S33** HRESIMS spectrum of compound **3**.

S22H95 #508 RT: 1.18 AV: 1 NL: 5.38E7  
T: FTMS + p ESI Full ms [200.0000-2000.0000]

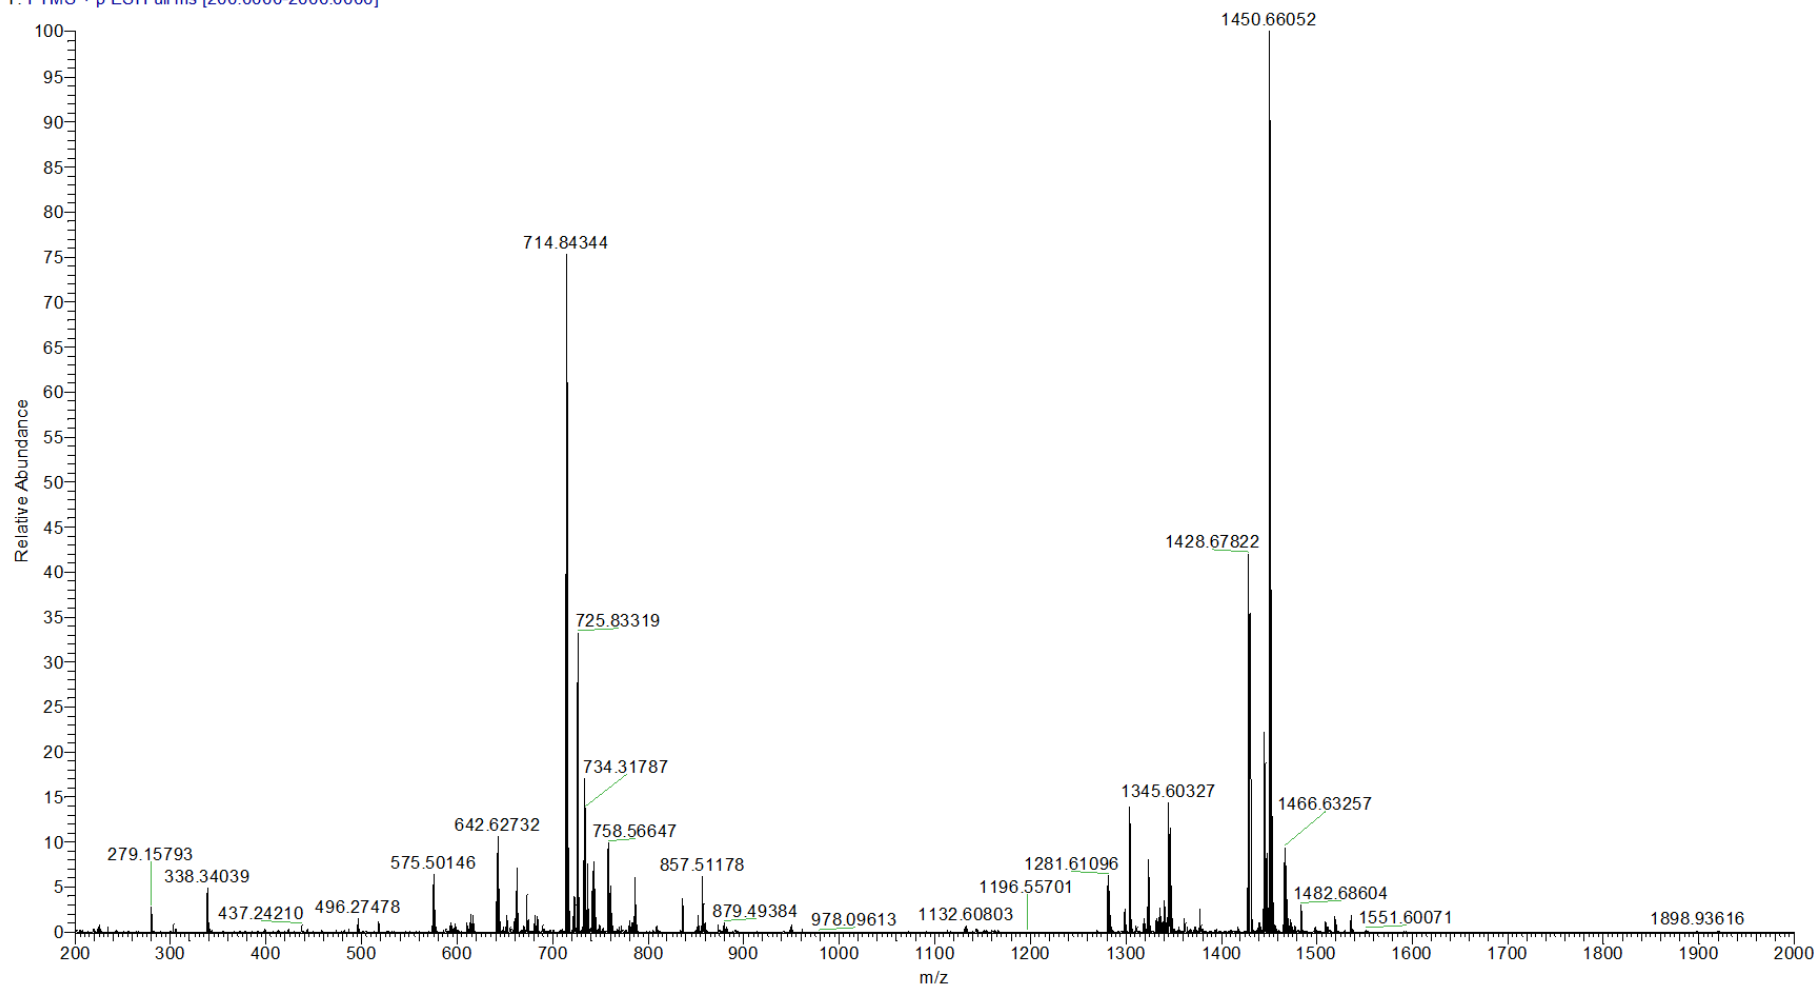

S51

**Fig. S34**  $^1\text{H}$  NMR spectrum (600 MHz) of compound **4** in  $\text{CDCl}_3$ .

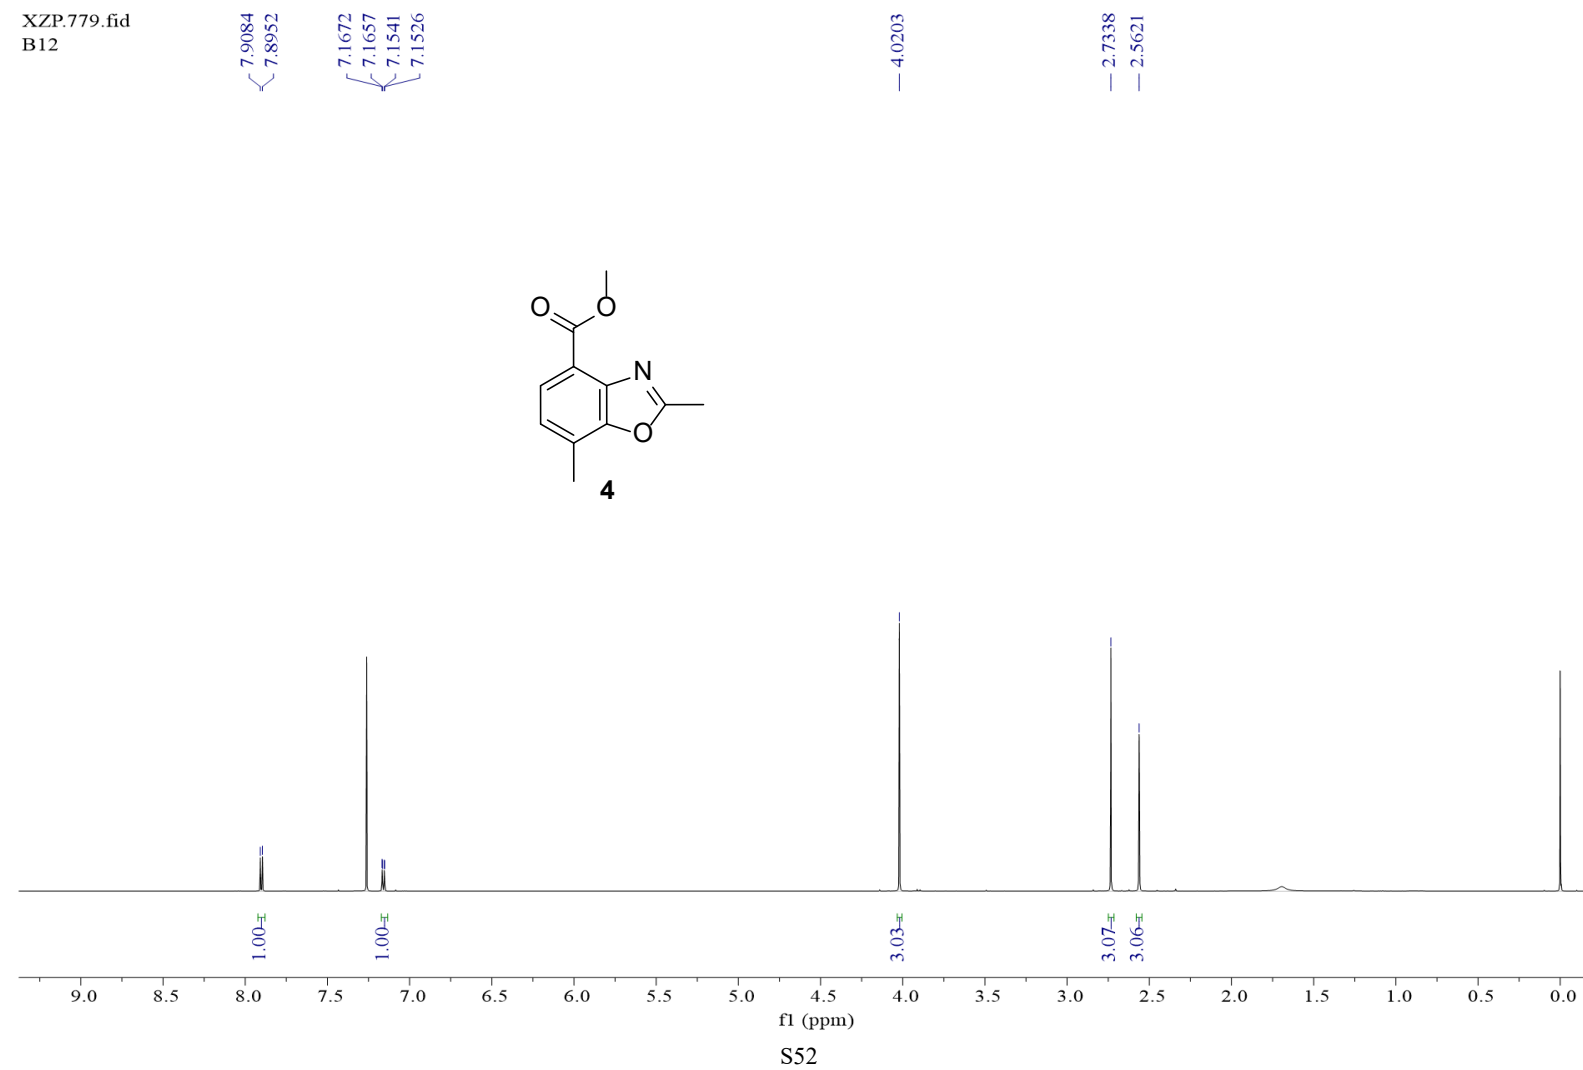

**Fig. S35**  $^{13}\text{C}\{^1\text{H}\}$  NMR spectrum (150 MHz) of compound **4** in  $\text{CDCl}_3$ .

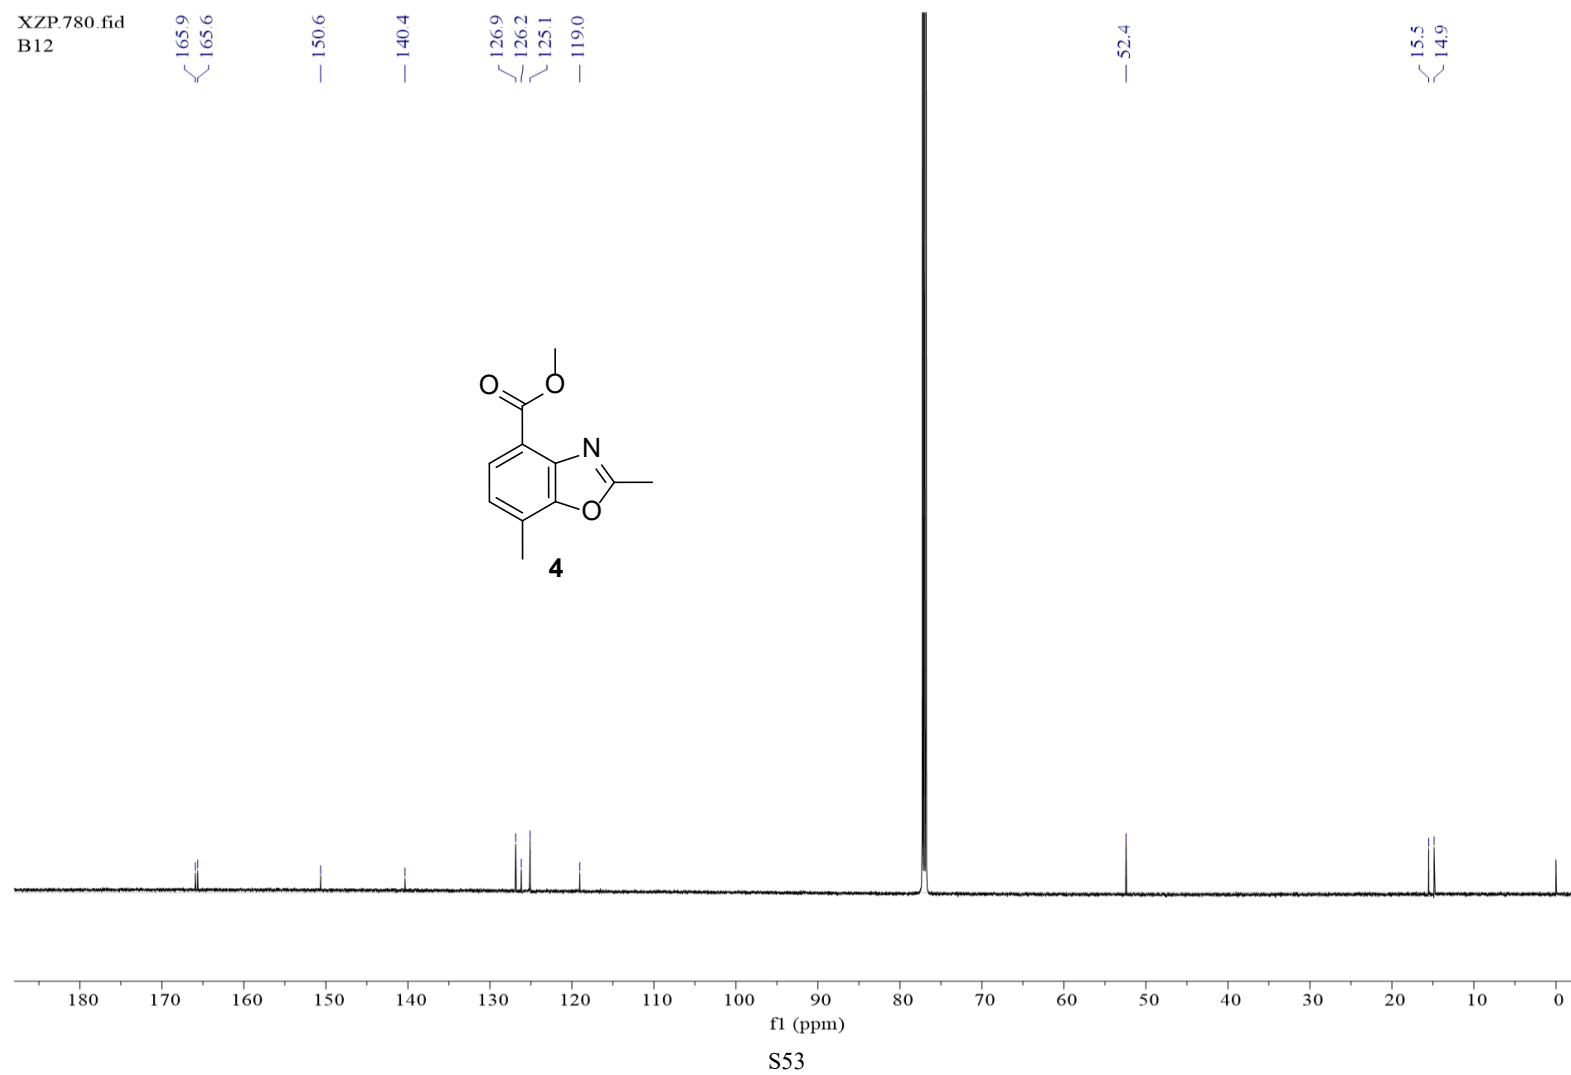

**Fig. S36** DEPT-135 spectrum (150 MHz) of compound **4** in CDCl<sub>3</sub>.

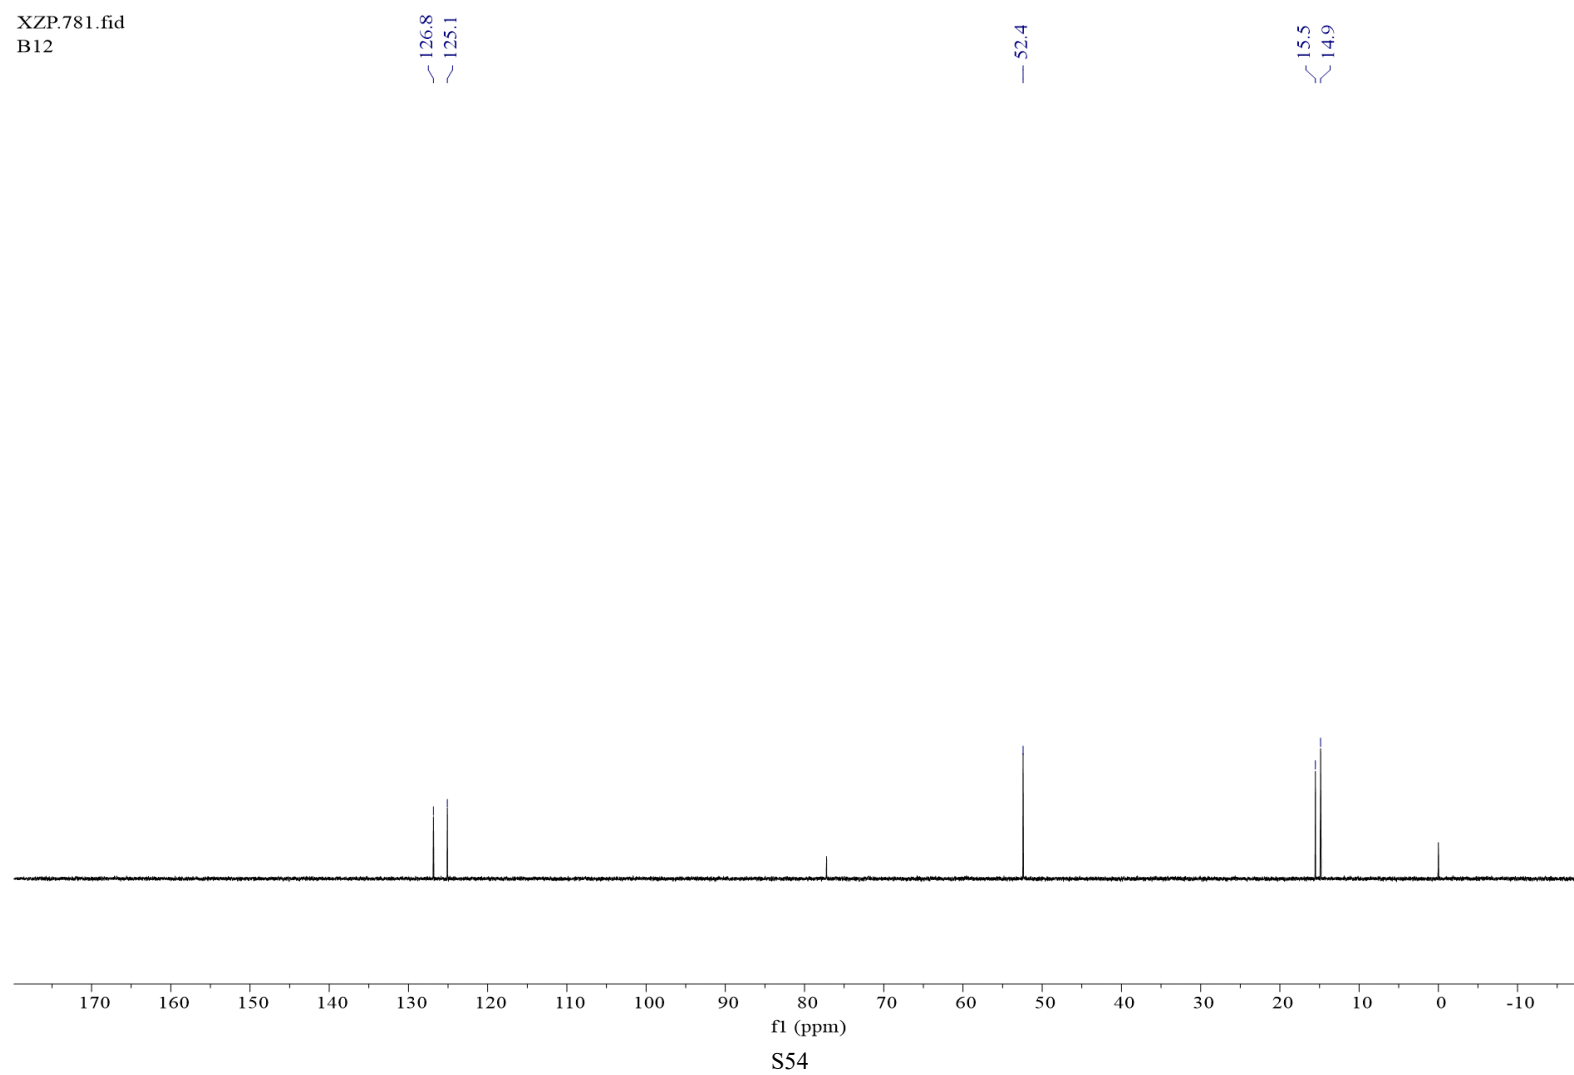

**Fig. S37** COSY spectrum (600 MHz) of compound **4** in CDCl<sub>3</sub>.

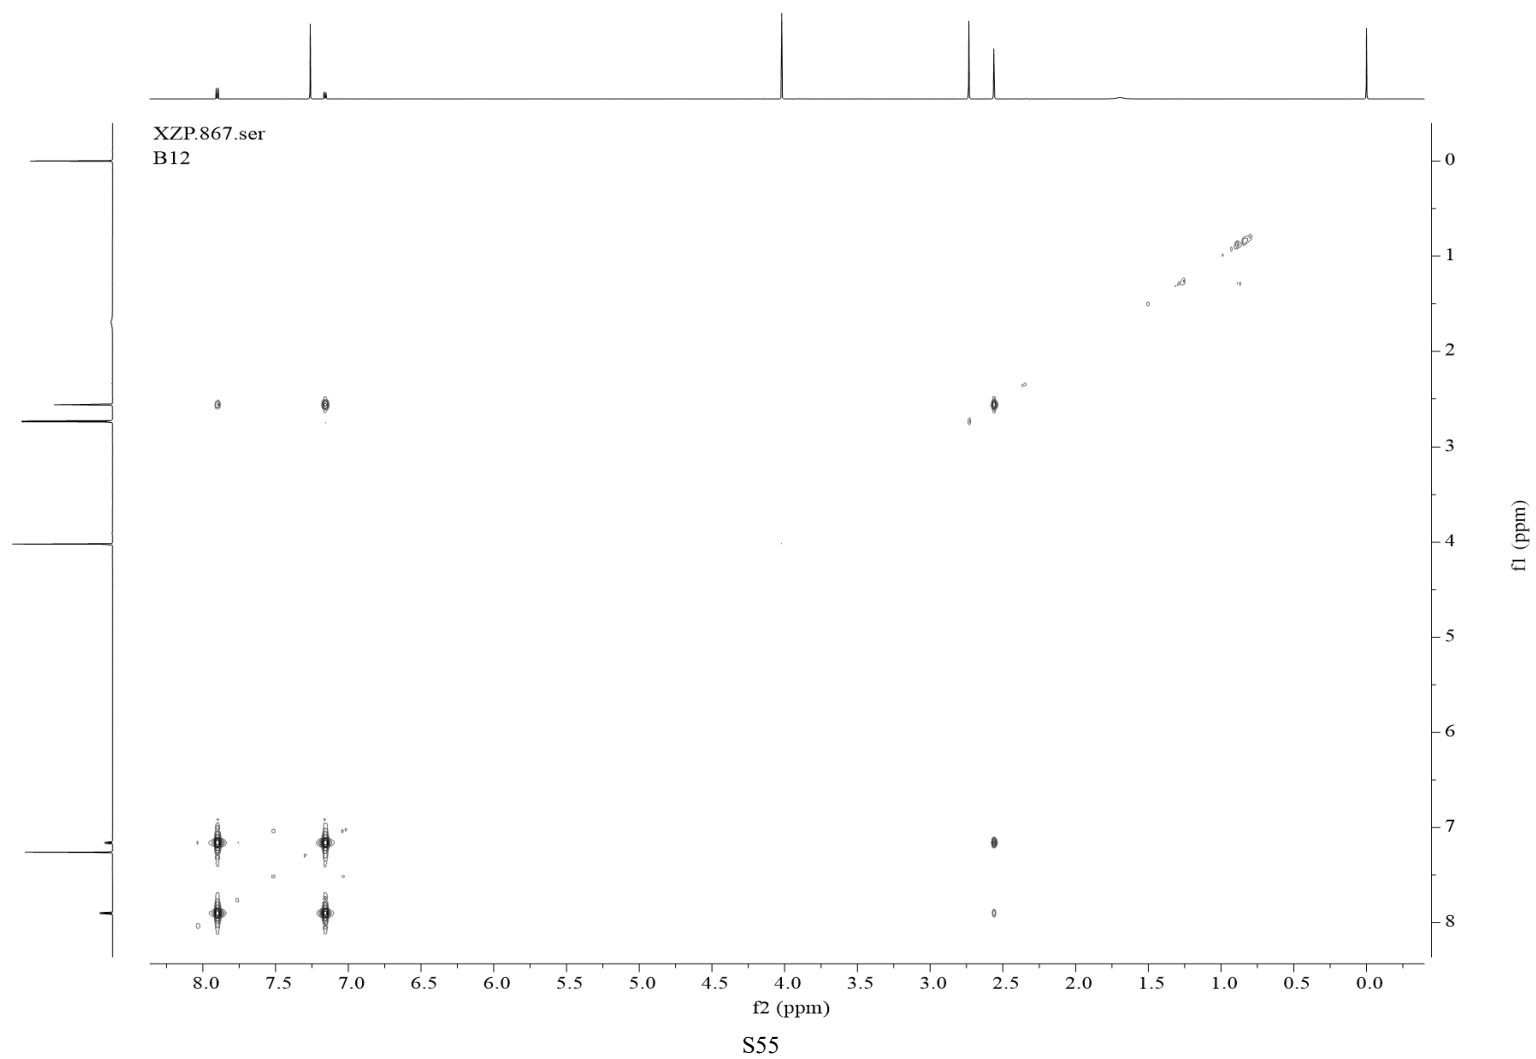

**Fig. S38** HSQC spectrum (600 MHz) of compound **4** in CDCl<sub>3</sub>.

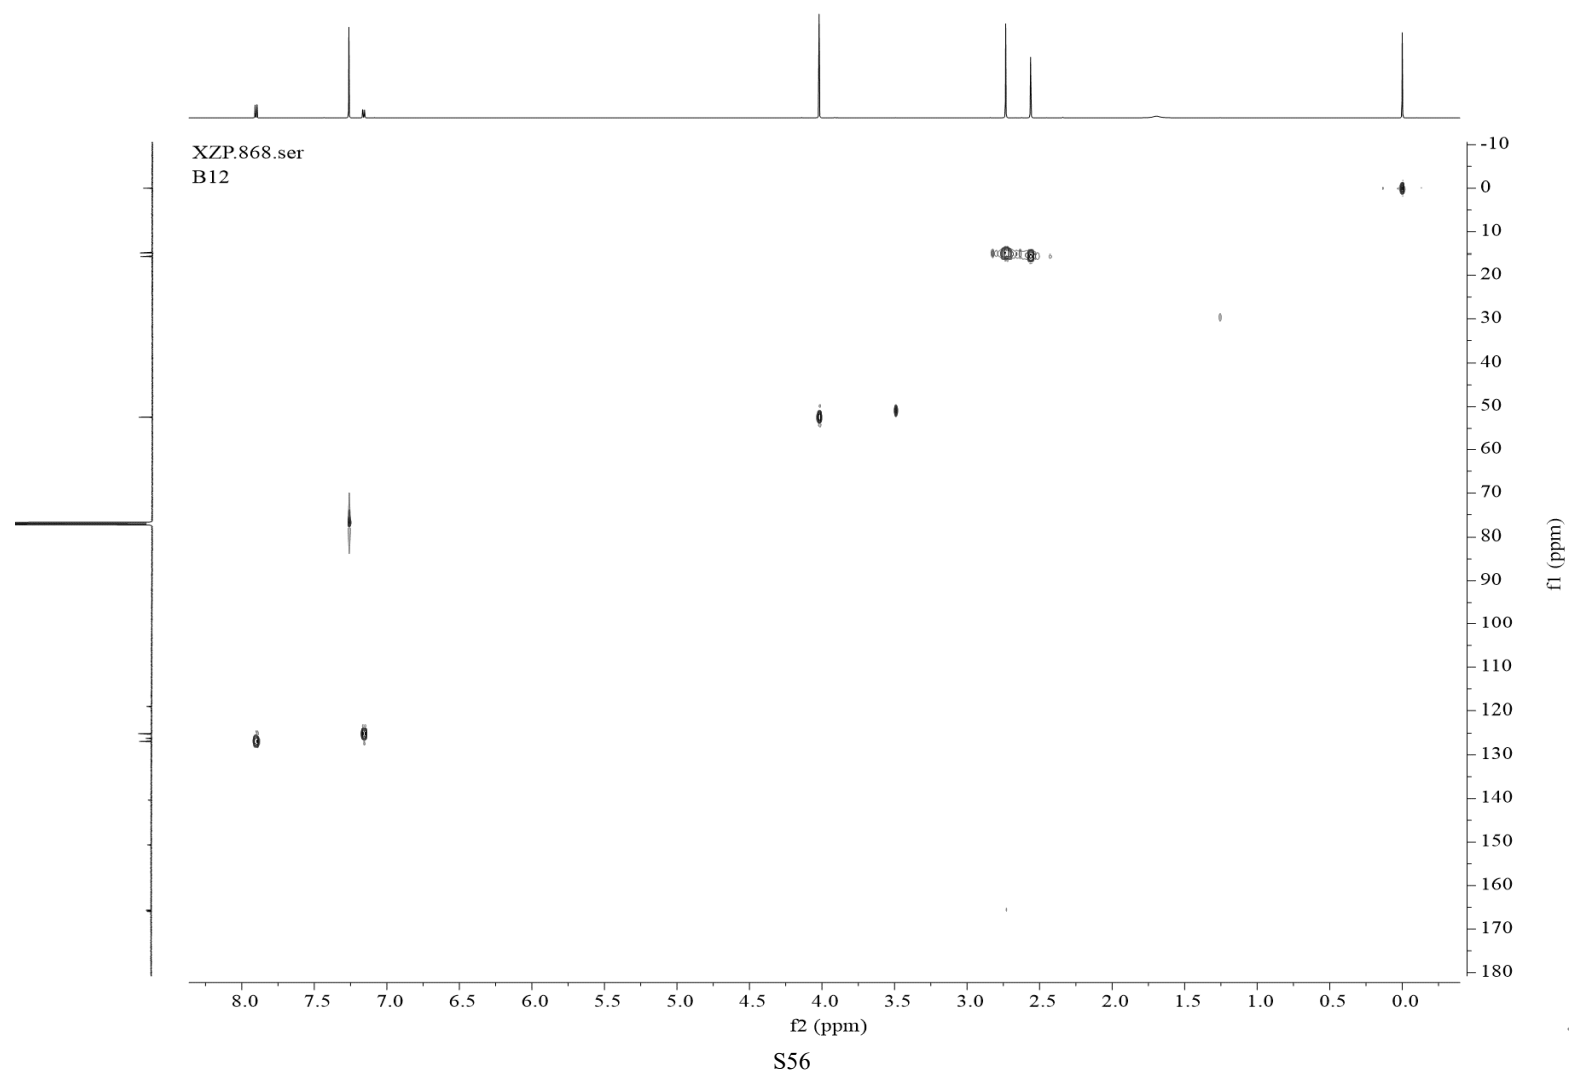





**Fig. S40** ESIMS spectrum of compound **4**.

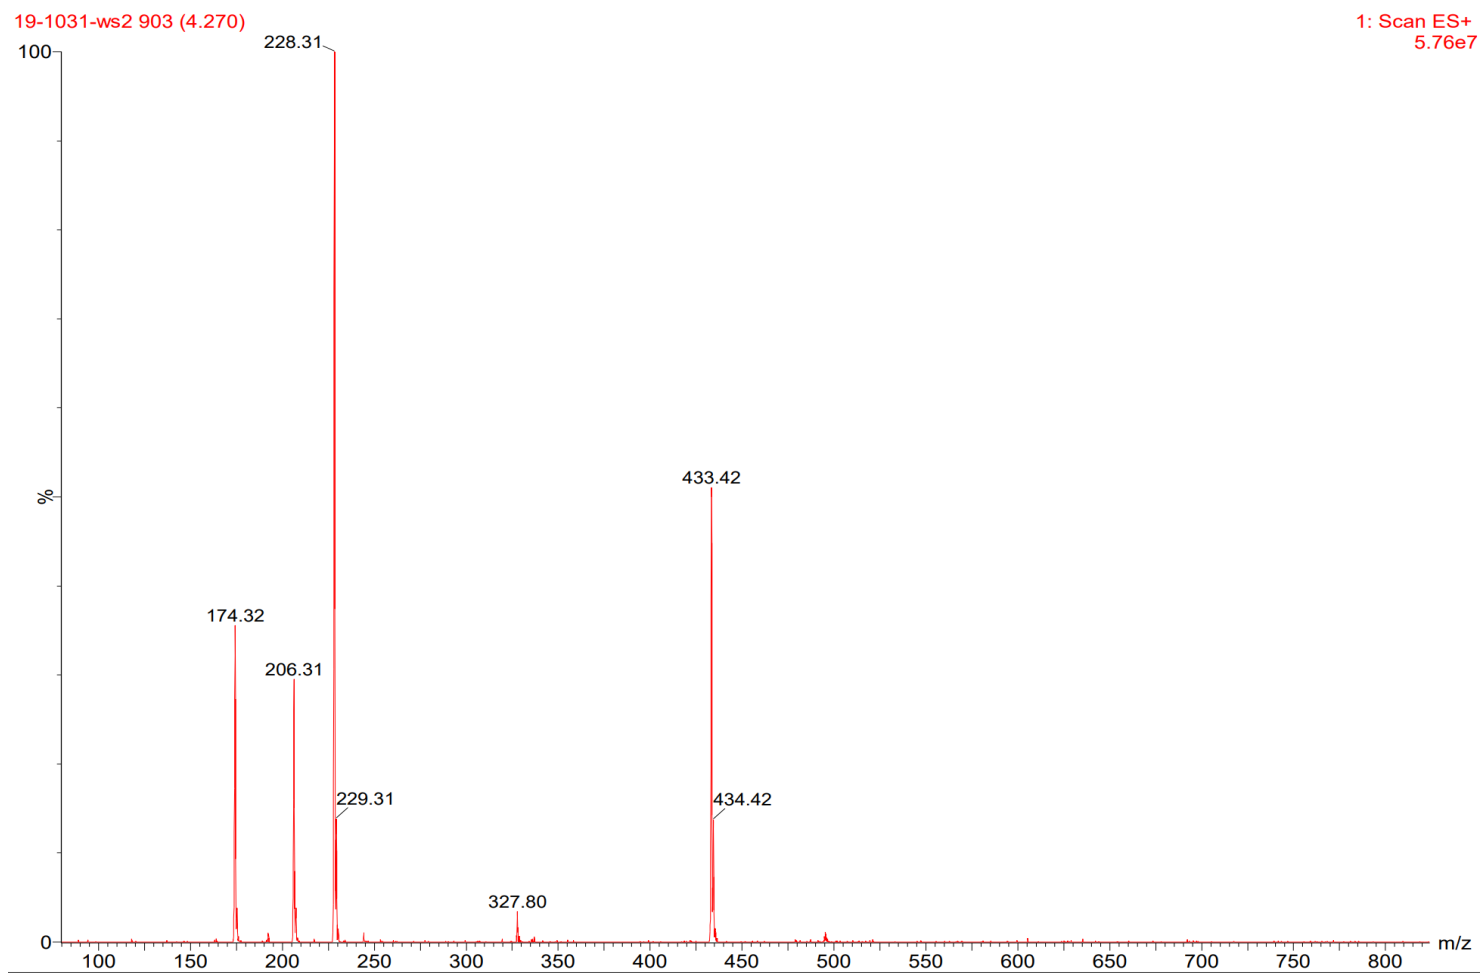

Supplement: d2ob02247h1.pdf [file d2ob02247h1.pdf]
